# Supplementary material for: De novo Transcriptome Assembly, Gene Annotation and SSR Marker Development in the Moon Seed Genus Menispermum (Menispermaceae)
Source: Front Genet. 2020 May 8;11:380. doi: 10.3389/fgene.2020.00380 (PMC7227793; doi:10.3389/fgene.2020.00380)
Supplement: TABLE S1 — Designed EST-SSR from CandiSSR. [file Table_1.XLSX]

## Sheet: Menispermum_est_Designed_Primer
Table S1:Designed EST-SSR from CandiSSR
CPSSRID	Forward primer1 (5'->3')	Tm (centigrade)	Size (bp)	Average identity (%)	Average coverage (%)	Reverse primer1 (5'->3')	Tm (centigrade)	Size (bp)	Average identity (%)	Average coverage (%)	Product1 size (bp)	Start	End	Forward primer2 (5'->3')	Tm (centigrade)	Size (bp)	Average identity (%)	Average coverage (%)	Reverse primer2 (5'->3')	Tm (centigrade)	Size (bp)	Average identity (%)	Average coverage (%)	Product2 size (bp)	Start	End	Forward primer3 (5'->3')	Tm (centigrade)	Size (bp)	Average identity (%)	Average coverage (%)	Reverse primer3 (5'->3')	Tm (centigrade)	Size (bp)	Average identity (%)	Average coverage (%)	Product3 size (bp)	Start	End
CPSSR_1|AAAAG	TGGTTCTTGAAACGGGCTTG	58.971	20	100	75	CCGTTGTCTCCCTGTTCCTC	60.037	20	100	100	180	92	271	GGTTCTTGAAACGGGCTTGT	58.97	20	100	80	CCGTTGTCTCCCTGTTCCTC	60.037	20	100	100	179	93	271	GTGGTTCTTGAAACGGGCTT	58.97	20	100	70	CCGTTGTCTCCCTGTTCCTC	60.037	20	100	100	181	91	271
CPSSR_2|AAAAG	TGGTTCTTGAAACGGGCTTG	58.971	20	100	75	CCGTTGTCTCCCTGTTCCTC	60.037	20	100	100	180	92	271	GGTTCTTGAAACGGGCTTGT	58.97	20	100	80	CCGTTGTCTCCCTGTTCCTC	60.037	20	100	100	179	93	271	GTGGTTCTTGAAACGGGCTT	58.97	20	100	70	CCGTTGTCTCCCTGTTCCTC	60.037	20	100	100	181	91	271
CPSSR_3|AAC	ACCTCACCAAGCCCAAACTT	59.738	20	100	100	GGCTGGTAGGCATGGGATTT	60.106	20	100	100	166	95	260	ACCTCACCAAGCCCAAACTT	59.738	20	100	100	TGATCGGTAGGGCTGGTAGG	60.469	20	100	100	176	95	270	CCTCACCAAGCCCAAACTTG	59.324	20	100	100	GGCTGGTAGGCATGGGATTT	60.106	20	100	100	165	96	260
CPSSR_4|AAC	ACCTCACCAAGCCCAAACTT	59.738	20	100	100	GGCTGGTAGGCATGGGATTT	60.106	20	100	100	166	95	260	ACCTCACCAAGCCCAAACTT	59.738	20	100	100	TGATCGGTAGGGCTGGTAGG	60.469	20	100	100	176	95	270	CCTCACCAAGCCCAAACTTG	59.324	20	100	100	GGCTGGTAGGCATGGGATTT	60.106	20	100	100	165	96	260
CPSSR_5|AAC	GATATTGGCGCGGCTCAATC	59.833	20	100	100	AGGATTGGGGAGGATTCGGA	60.03	20	100	100	195	106	300	GATATTGGCGCGGCTCAATC	59.833	20	100	100	TCGGAGAAGGCCTTGTAGGA	59.959	20	100	100	180	106	285	CCTTCACAGGGCTGCTTTCT	60.251	20	100	100	AGGATTGGGGAGGATTCGGA	60.03	20	100	100	150	151	300
CPSSR_6|AAC	GATATTGGCGCGGCTCAATC	59.833	20	100	100	AGGATTGGGGAGGATTCGGA	60.03	20	100	100	195	106	300	GATATTGGCGCGGCTCAATC	59.833	20	100	100	TCGGAGAAGGCCTTGTAGGA	59.959	20	100	100	180	106	285	CCTTCACAGGGCTGCTTTCT	60.251	20	100	100	AGGATTGGGGAGGATTCGGA	60.03	20	100	100	150	151	300
CPSSR_7|AAC	TCACGCCTTTCTTTAGTGTCCA	59.897	22	100	100	TGCGTGAGATAAGCACTTCA	57.258	20	N/A	N/A	147	89	235	ACGCCTTTCTTTAGTGTCCACT	59.896	22	100	100	TGCGTGAGATAAGCACTTCA	57.258	20	N/A	N/A	145	91	235	CACGCCTTTCTTTAGTGTCCAC	59.777	22	100	100	TGCGTGAGATAAGCACTTCA	57.258	20	N/A	N/A	146	90	235
CPSSR_8|AAC	CGTAGAGCAACGAGATCGCT	59.972	20	100	100	ACGAAGATGCGGCTGATGAT	59.894	20	100	100	136	145	280	TCGAATTCGGAGCGTAGAGC	59.971	20	100	100	ACGAAGATGCGGCTGATGAT	59.894	20	100	100	148	133	280	TACAGGAGCAGAGCAACAGC	60.037	20	100	85	ACGAAGATGCGGCTGATGAT	59.894	20	100	100	200	81	280
CPSSR_9|AAC	GTCGTGTACGTGGCATTTGG	59.835	20	100	100	TCACTCGCTCCTCAAAACCC	59.965	20	N/A	N/A	181	89	269	GGTCGTGTACGTGGCATTTG	59.835	20	100	100	TCACTCGCTCCTCAAAACCC	59.965	20	N/A	N/A	182	88	269	GTCGTGTACGTGGCATTTGG	59.835	20	100	100	CACTCGCTCCTCAAAACCCT	59.965	20	N/A	N/A	180	89	268
CPSSR_10|AAC	ATGCTGCAGAGTCACCCATC	60.107	20	100	100	GCAGTTTGAGTGGCAGTTGG	59.969	20	95	100	146	103	248	ATGCTGCAGAGTCACCCATC	60.107	20	100	100	GGCAGTTTGAGTGGCAGTTG	59.969	20	95	100	147	103	249	AAATGCTGCAGAGTCACCCA	59.889	20	100	100	GCAGTTTGAGTGGCAGTTGG	59.969	20	95	100	148	101	248
CPSSR_11|AAC	CGAAGATGGAGATGCAGCCA	60.179	20	100	100	CTACGGATGATCGCGCTCTT	60.04	20	100	100	199	145	343	AGATGGAGATGCAGCCACTG	59.819	20	100	100	CTACGGATGATCGCGCTCTT	60.04	20	100	100	196	148	343	CGAAGATGGAGATGCAGCCA	60.179	20	100	100	AATCGCATCCAAAGCTTCGC	59.901	20	100	100	142	145	286
CPSSR_12|AAG	GTCGAGTAAGGCCTGGCATT	60.108	20	100	100	TTGGGTGTCTTGCAACTGCT	60.396	20	100	100	175	73	247	GCCTGGCATTTGGAGAAAGC	60.108	20	100	100	TTGGGTGTCTTGCAACTGCT	60.396	20	100	100	165	83	247	AGGCCTGGCATTTGGAGAAA	59.885	20	100	100	TTGGGTGTCTTGCAACTGCT	60.396	20	100	100	167	81	247
CPSSR_13|AAG	GTCGAGTAAGGCCTGGCATT	60.108	20	100	100	TTGGGTGTCTTGCAACTGCT	60.396	20	100	100	175	73	247	GCCTGGCATTTGGAGAAAGC	60.108	20	100	100	TTGGGTGTCTTGCAACTGCT	60.396	20	100	100	165	83	247	AGGCCTGGCATTTGGAGAAA	59.885	20	100	100	TTGGGTGTCTTGCAACTGCT	60.396	20	100	100	167	81	247
CPSSR_14|AAG	GTCGAGTAAGGCCTGGCATT	60.108	20	100	100	TTGGGTGTCTTGCAACTGCT	60.396	20	100	100	175	73	247	GCCTGGCATTTGGAGAAAGC	60.108	20	100	100	TTGGGTGTCTTGCAACTGCT	60.396	20	100	100	165	83	247	AGGCCTGGCATTTGGAGAAA	59.885	20	100	100	TTGGGTGTCTTGCAACTGCT	60.396	20	100	100	167	81	247
CPSSR_15|AAG	GTCGAGTAAGGCCTGGCATT	60.108	20	100	100	TTGGGTGTCTTGCAACTGCT	60.396	20	100	100	175	73	247	GCCTGGCATTTGGAGAAAGC	60.108	20	100	100	TTGGGTGTCTTGCAACTGCT	60.396	20	100	100	165	83	247	AGGCCTGGCATTTGGAGAAA	59.885	20	100	100	TTGGGTGTCTTGCAACTGCT	60.396	20	100	100	167	81	247
CPSSR_16|AAG	CATTTAGAAACCACACAAGC	53.071	20	100	100	ACTTGAAGATTGGTGCCAGA	57.043	20	100	100	148	38	185	CATTTAGAAACCACACAAGC	53.071	20	100	100	ACTTGAAGATTGGTGCCAGAA	57.772	21	100	100	148	38	185	CATTTAGAAACCACACAAGC	53.071	20	100	100	CTTGAAGATTGGTGCCAGAA	55.938	20	100	100	147	38	184
CPSSR_17|AAG	AGTTCAACGACAGGCAGAGG	59.966	20	100	100	TGAACTGGCTGACCGTCTTC	59.966	20	90	100	184	136	319	AGTTCAACGACAGGCAGAGG	59.966	20	100	100	CTTTCATCGGCGTCAGACCT	60.109	20	100	100	109	136	244	ACCACCACCAGCAGAAGAAG	59.891	20	100	60	TGAACTGGCTGACCGTCTTC	59.966	20	90	100	143	177	319
CPSSR_18|AAG	GTCTGCAGTGAGAAGGGCTT	59.964	20	100	100	AAAGGCGCTTACATGCTGTT	58.752	20	100	100	185	64	248	GTCTGCAGTGAGAAGGGCTT	59.964	20	100	100	AAAAGGCGCTTACATGCTGT	58.752	20	100	100	186	64	249	GGCACTCTCTTCTCCCACTG	59.751	20	95	100	AAAGGCGCTTACATGCTGTT	58.752	20	100	100	101	148	248
CPSSR_19|AAG	GCGTGTTGCATGCAAGTCAA	60.595	20	N/A	N/A	TGCACAAGAAGCTTTGTTGCA	59.796	21	100	100	158	100	257	TGTTGCATGCAAGTCAAGCA	59.255	20	95	100	TGCACAAGAAGCTTTGTTGCA	59.796	21	100	100	155	103	257	GCGTGTTGCATGCAAGTCA	60.009	19	N/A	N/A	TGCACAAGAAGCTTTGTTGCA	59.796	21	100	100	158	100	257
CPSSR_20|AAG	AGTTCAACGACAGGCAGAGG	59.966	20	100	100	TGAACTGGCTGACCGTCTTC	59.966	20	90	100	184	136	319	AGTTCAACGACAGGCAGAGG	59.966	20	100	100	CTTTCATCGGCGTCAGACCT	60.109	20	100	100	109	136	244	ACCACCACCAGCAGAAGAAG	59.891	20	100	60	TGAACTGGCTGACCGTCTTC	59.966	20	90	100	143	177	319
CPSSR_21|AAG	CCTCCCATTTCCGCAACTGA	60.322	20	N/A	N/A	TGGTCTCTGGCGTCTCAAAC	59.966	20	100	100	126	145	270	CCTCCCATTTCCGCAACTGA	60.322	20	N/A	N/A	TTTTCTGGGGAACGGAGAGC	59.964	20	100	100	187	145	331	CCTCCCATTTCCGCAACTGA	60.322	20	N/A	N/A	CTCTGGCGTCTCAAACTCGT	60.039	20	100	100	122	145	266
CPSSR_22|AAG	CTCGGGCAAGCTTATCGACT	59.897	20	100	100	TGGACCCCTGATTCGTCTTC	59.097	20	100	100	196	131	326	CTCGGGCAAGCTTATCGACT	59.897	20	100	100	GACCCCTGATTCGTCTTCTCC	59.863	21	100	100	194	131	324	CTCGGGCAAGCTTATCGACT	59.897	20	100	100	GGACCCCTGATTCGTCTTCTC	59.863	21	100	100	195	131	325
CPSSR_23|AAG	CTCGGGCAAGCTTATCGACT	59.897	20	100	100	TCCTCTCTGGATTTTCAGCCA	58.731	21	100	100	199	53	251	CTCGGGCAAGCTTATCGACT	59.897	20	100	100	GGATTTTCAGCCAATTCTGCCT	59.501	22	100	100	191	53	243	CTCGGGCAAGCTTATCGACT	59.897	20	100	100	TTCAGCCAATTCTGCCTCTT	57.408	20	100	100	186	53	238
CPSSR_24|AAG	ATCTCCAACGCCCACTTTCG	60.674	20	100	100	AGAGATTCTCCATGTGTGCACA	59.696	22	100	100	166	124	289	ACGCCCACTTTCGCTATTTG	59.198	20	100	95	TCCTTTGCATCCTCTTCGTTCT	59.697	22	100	100	196	131	326	ACGCCCACTTTCGCTATTTG	59.198	20	100	95	TCTTCCTTTGCATCCTCTTCGT	59.697	22	100	100	199	131	329
CPSSR_25|AAG	AGCGCCATGGATCATCAGAG	59.965	20	100	100	AAAACTCCCACCGTCCATCG	60.321	20	100	100	177	108	284	AGCGCCATGGATCATCAGAG	59.965	20	100	100	CCCACCGTCCATCGACAATT	60.392	20	100	100	171	108	278	CATCCGGTGAGGTTCGTGAA	60.038	20	100	65	CCCACCGTCCATCGACAATT	60.392	20	100	100	196	83	278
CPSSR_26|AAG	CGTCAGACCCAACTTCACGA	59.968	20	95	100	GCTCGAGAGAAGTGGCTGAG	60.179	20	100	100	199	85	283	CTCTCTGCCTCGTCACTTCC	59.828	20	100	100	GCTCGAGAGAAGTGGCTGAG	60.179	20	100	100	150	134	283	CCTCTCTGCCTCGTCACTTC	59.828	20	100	100	GCTCGAGAGAAGTGGCTGAG	60.179	20	100	100	151	133	283
CPSSR_27|AAG	CGTCAGACCCAACTTCACGA	59.968	20	95	100	GCTCGAGAGAAGTGGCTGAG	60.179	20	100	100	199	85	283	CTCTCTGCCTCGTCACTTCC	59.828	20	100	100	GCTCGAGAGAAGTGGCTGAG	60.179	20	100	100	150	134	283	CCTCTCTGCCTCGTCACTTC	59.828	20	100	100	GCTCGAGAGAAGTGGCTGAG	60.179	20	100	100	151	133	283
CPSSR_28|AAG	AAGCATCCATCCCAGGCAAT	59.736	20	100	100	TCGGCCGTCATTGTCTTCAA	59.966	20	100	100	196	38	233	GAAGCATCCATCCCAGGCAA	60.396	20	100	100	TCGGCCGTCATTGTCTTCAA	59.966	20	100	100	197	37	233	AAGCATCCATCCCAGGCAAT	59.736	20	100	100	ATCGGCCGTCATTGTCTTCA	59.751	20	100	100	197	38	234
CPSSR_29|AAG	AAGCATCCATCCCAGGCAAT	59.736	20	100	100	TCGCTGGCTTCAATGTACAGT	59.998	21	100	100	186	38	223	GAAGCATCCATCCCAGGCAA	60.396	20	100	100	TCGCTGGCTTCAATGTACAGT	59.998	21	100	100	187	37	223	AAGCATCCATCCCAGGCAAT	59.736	20	100	100	CCATCGCTGGCTTCAATGTAC	59.668	21	100	100	189	38	226
CPSSR_30|AAG	TCAAGAAACCGCGAGAACCA	59.895	20	100	100	AGTGCTGCAATGCTCATCCT	60.034	20	100	100	152	148	299	GCGAGAACCACCTCCCTAAC	60.108	20	100	100	AGTGCTGCAATGCTCATCCT	60.034	20	100	100	142	158	299	AACCACCTCCCTAACCCTGA	59.805	20	100	100	AGTGCTGCAATGCTCATCCT	60.034	20	100	100	137	163	299
CPSSR_31|AAG	CGGCCATTAAGGTTGTGCTG	59.829	20	N/A	N/A	GGAGACAACGACCAACTGCT	60.25	20	N/A	N/A	143	165	307	CAGTGTTTGATGCGGCCATT	59.756	20	100	80	GGAGACAACGACCAACTGCT	60.25	20	N/A	N/A	155	153	307	CGGCCATTAAGGTTGTGCTG	59.829	20	N/A	N/A	AGGGAGACAACGACCAACTG	59.607	20	95	100	145	165	309
CPSSR_32|AAG	TTCACCGTGCTAGCCTTGAG	60.037	20	100	100	AGCTTCAGGGTGGGAACTTT	59.146	20	100	100	195	154	348	TGTTTTCACCGTGCTAGCCT	59.892	20	100	100	AGCTTCAGGGTGGGAACTTT	59.146	20	100	100	199	150	348	GTGTTTTCACCGTGCTAGCC	59.763	20	100	100	AGCTTCAGGGTGGGAACTTT	59.146	20	100	100	200	149	348
CPSSR_33|AC	TAGGTGGGCCGGATTACAGA	60.032	20	100	100	GGCCATGAGAAGAGGAACCT	59.085	20	100	100	190	135	324	TAGGTGGGCCGGATTACAGA	60.032	20	100	100	AGGCCATGAGAAGAGGAACC	59.085	20	100	100	191	135	325	TAGGTGGGCCGGATTACAGA	60.032	20	100	100	GGCCATGAGAAGAGGAACCTC	60.134	21	100	100	190	135	324
CPSSR_34|AC	TAGGTGGGCCGGATTACAGA	60.032	20	100	100	GGCCATGAGAAGAGGAACCT	59.085	20	100	100	190	135	324	TAGGTGGGCCGGATTACAGA	60.032	20	100	100	AGGCCATGAGAAGAGGAACC	59.085	20	100	100	191	135	325	TAGGTGGGCCGGATTACAGA	60.032	20	100	100	GGCCATGAGAAGAGGAACCTC	60.134	21	100	100	190	135	324
CPSSR_35|AC	TGGGGTTGTACATGTGAGTT	56.663	20	N/A	N/A	ACACACTTCAATGTAGGCCTGT	59.893	22	100	100	167	74	240	TGGGGTTGTACATGTGAGTT	56.663	20	N/A	N/A	TGCACATCGAAACACACTTCA	58.716	21	100	100	178	74	251	ATGGGGTTGTACATGTGAGT	56.429	20	N/A	N/A	ACACACTTCAATGTAGGCCTGT	59.893	22	100	100	168	73	240
CPSSR_36|AC	GTTCTCACCCTCCCCACTTC	59.675	20	95	100	GGGGAGGTTGAAACTGGGTT	59.812	20	95	100	176	61	236	TGTTCTCACCCTCCCCACTT	60.401	20	95	100	GGGGAGGTTGAAACTGGGTT	59.812	20	95	100	177	60	236	GTTCTCACCCTCCCCACTTC	59.675	20	95	100	TCGCTGTACACTTGGAGGAC	59.398	20	100	100	133	61	193
CPSSR_37|AC	GTTCTCACCCTCCCCACTTC	59.675	20	95	100	GGGGAGGTTGAAACTGGGTT	59.812	20	95	100	176	61	236	TGTTCTCACCCTCCCCACTT	60.401	20	95	100	GGGGAGGTTGAAACTGGGTT	59.812	20	95	100	177	60	236	GTTCTCACCCTCCCCACTTC	59.675	20	95	100	TCGCTGTACACTTGGAGGAC	59.398	20	100	100	133	61	193
CPSSR_38|AC	CCCAGCCCTGTGAAGATTGT	59.961	20	100	100	GGATTTACACATGCGCGAACA	59.87	21	100	100	146	94	239	CCCAGCCCTGTGAAGATTGT	59.961	20	100	100	TGGATTTACACATGCGCGAAC	59.87	21	100	100	147	94	240	AGCCCTGTGAAGATTGTGCA	59.889	20	100	100	GGATTTACACATGCGCGAACA	59.87	21	100	100	143	97	239
CPSSR_39|AC	CCGCCAATCCGAGATCGTAT	59.756	20	100	100	AGCCCTGCATTTGTTTGTGC	60.25	20	95	100	167	98	264	CGCAGACCCTCCAAATCTCA	59.75	20	95	100	AGCCCTGCATTTGTTTGTGC	60.25	20	95	100	106	159	264	CGCAGACCCTCCAAATCTCA	59.75	20	95	100	TGGGGCTTCATTTGGAGGTG	60.252	20	100	100	171	159	329
CPSSR_40|ACA	GCCCAGGTCCATCTCTCACT	60.98	20	100	100	CGTGCATTGTGGAGAATTGGG	60.135	21	100	100	194	169	362	CCCAGGTCCATCTCTCACTC	58.881	20	100	100	CGTGCATTGTGGAGAATTGGG	60.135	21	100	100	193	170	362	TGTCCTCGAATCGCCAATCC	60.179	20	100	100	AGACACCTTTCTTCTTGCTGCT	60.159	22	100	100	173	72	244
CPSSR_41|ACA	ATTTCGCTGAGATGGGCCAA	60.034	20	100	100	ATGGCTCTTCGTGTTGCTCT	59.677	20	100	100	100	178	277	TTGCCATGTTCGCGAATTGG	60.109	20	100	100	CTCTGCCACGAAATCTCCCA	59.75	20	100	85	168	88	255	TTGCCATGTTCGCGAATTGG	60.109	20	100	100	TTCGTGTTGCTCTCCCTCTG	59.682	20	100	85	183	88	270
CPSSR_42|ACC	GGCCGTTGGGTACTCTGATC	60.179	20	100	100	CTGGCCGATCTGGAAACACT	60.036	20	100	100	187	66	252	GGCCGTTGGGTACTCTGATC	60.179	20	100	100	CACTGGCCGATCTGGAAACA	60.322	20	100	100	189	66	254	GGCCGTTGGGTACTCTGATC	60.179	20	100	100	ACTGGCCGATCTGGAAACAC	60.322	20	100	100	188	66	253
CPSSR_43|ACC	GAAAGCACCAGCAGCAGATG	59.829	20	100	100	GGACCTGCTTCTGTTGCTCT	59.964	20	100	80	174	152	325	GAAAGCACCAGCAGCAGATG	59.829	20	100	100	CGGCTCCGTGATCTAGCTTT	59.897	20	100	100	114	152	265	GAAAGCACCAGCAGCAGATG	59.829	20	100	100	AATTCCTCGGCTCCGTGATC	59.895	20	100	100	121	152	272
CPSSR_44|ACC	CCTCAAATACGCCTGGAGCA	60.108	20	95	100	TAGCGAGATGGAGGGGACAA	60.033	20	100	80	196	95	290	CCTCAAATACGCCTGGAGCA	60.108	20	95	100	TTAGCGAGATGGAGGGGACA	60.033	20	100	85	197	95	291	AATACGCCTGGAGCAGACAC	60.108	20	N/A	N/A	TAGCGAGATGGAGGGGACAA	60.033	20	100	80	191	100	290
CPSSR_45|ACG	TTCTCTGCTCCCACGTCAAC	59.966	20	95	100	AGGCCTCTGGAGTGCAAATC	60.035	20	100	100	118	79	196	TTCTCCCTTCTCTGCTCCCA	59.883	20	95	100	AGGCCTCTGGAGTGCAAATC	60.035	20	100	100	125	72	196	TTCTCTGCTCCCACGTCAAC	59.966	20	95	100	CTCCTCCCAGAAAGGTGCTC	59.748	20	100	100	177	79	255
CPSSR_46|ACT	ACTCCTCCTCGCCACTCATA	59.741	20	100	90	AAGGGCTCCTCCTTCGTTTG	59.963	20	100	100	137	148	284	ACTCCTCCTCGCCACTCATA	59.741	20	100	90	GCCTGAGAGCTCTTCACCAG	60.108	20	100	100	182	148	329	ACTCCTCCTCGCCACTCATA	59.741	20	100	90	CAGCCTGAGAGCTCTTCACC	60.108	20	100	100	184	148	331
CPSSR_47|ACT	GACATCGTGGGAAGAGCGAT	59.897	20	100	100	CGTGGCTGGGATTAGGGTTT	60.034	20	N/A	N/A	171	101	271	GACATCGTGGGAAGAGCGAT	59.897	20	100	100	CACAAGGAGGAATCGTGGCT	60.036	20	100	80	184	101	284	GACATCGTGGGAAGAGCGAT	59.897	20	100	100	GAGGAATCGTGGCTGGGATT	59.819	20	100	65	178	101	278
CPSSR_48|AG	TGGTGATGGTGATGGTGGTG	59.962	20	95	100	TCTACCTCCCGTTCCGTCTC	60.394	20	100	100	196	83	278	TGGTGGTGATGGTGATGGTG	59.962	20	95	100	TCTACCTCCCGTTCCGTCTC	60.394	20	100	100	199	80	278	GTGGTGATGGTGATGGTGGT	59.962	20	95	100	TCTACCTCCCGTTCCGTCTC	60.394	20	100	100	197	82	278
CPSSR_49|AG	CTAACGGTGGAGACGCAGAG	60.179	20	100	100	AATCGCTGCCTCTCCCTTTC	60.107	20	100	100	165	174	338	CTAACGGTGGAGACGCAGAG	60.179	20	100	100	TCGCACACAACATCAGCTCA	60.25	20	100	100	140	174	313	CGACGACTCGAGATCAGTGG	59.973	20	100	95	CAGTTGACACGCGTCTTCTG	59.496	20	100	100	178	89	266
CPSSR_50|AG	TGGCCCTCCTTTTACTGCAA	59.519	20	100	80	TTACACACACCAAGCTTGCC	58.971	20	100	100	185	50	234	TTGGCCCTCCTTTTACTGCA	59.519	20	95	100	TTACACACACCAAGCTTGCC	58.971	20	100	100	186	49	234	TGGCCCTCCTTTTACTGCAA	59.519	20	100	80	TTTACACACACCAAGCTTGCC	59.593	21	100	100	186	50	235
CPSSR_51|AG	GGGAGAGAACGAAGTGCGAA	60.039	20	100	100	AGAGAGCAGGCAGTACTGGA	59.96	20	100	100	159	96	254	TAAGGTGGGGTTGTGAGGGA	60.104	20	100	100	AGAGAGCAGGCAGTACTGGA	59.96	20	100	100	183	72	254	GACGGGGAGAGAACGAAGTG	60.109	20	100	100	AGAGAGCAGGCAGTACTGGA	59.96	20	100	100	163	92	254
CPSSR_52|AG	GGGAGAGAACGAAGTGCGAA	60.039	20	100	100	AGAGAGCAGGCAGTACTGGA	59.96	20	100	100	159	96	254	TAAGGTGGGGTTGTGAGGGA	60.104	20	100	100	AGAGAGCAGGCAGTACTGGA	59.96	20	100	100	183	72	254	GACGGGGAGAGAACGAAGTG	60.109	20	100	100	AGAGAGCAGGCAGTACTGGA	59.96	20	100	100	163	92	254
CPSSR_53|AG	TGTCGTCTGATACAAGCAACA	57.621	21	100	100	CGAGGAGATCGTCAGCAAGG	60.249	20	100	100	113	170	282	GTCGTCTGATACAAGCAACAACA	59.507	23	100	100	CGAGGAGATCGTCAGCAAGG	60.249	20	100	100	112	171	282	TGTCGTCTGATACAAGCAACAAC	59.507	23	100	100	CGAGGAGATCGTCAGCAAGG	60.249	20	100	100	113	170	282
CPSSR_54|AG	CGAAAACTTCAGCGCCTCAA	59.414	20	100	100	TCGAGACGCATTGGAACCAA	59.966	20	100	100	120	121	240	CGAAAACTTCAGCGCCTCAA	59.414	20	100	100	TGTCATACGGGCCAAGATCG	59.896	20	95	100	137	121	257	CGAAAACTTCAGCGCCTCAA	59.414	20	100	100	TGGTTTGTCATACGGGCCAA	59.889	20	95	100	142	121	262
CPSSR_55|AG	CGAAAACTTCAGCGCCTCAA	59.414	20	100	100	TCGAGACGCATTGGAACCAA	59.966	20	100	100	120	121	240	CGAAAACTTCAGCGCCTCAA	59.414	20	100	100	TGTCATACGGGCCAAGATCG	59.896	20	95	100	137	121	257	CGAAAACTTCAGCGCCTCAA	59.414	20	100	100	TGGTTTGTCATACGGGCCAA	59.889	20	95	100	142	121	262
CPSSR_56|AG	CGAAAACTTCAGCGCCTCAA	59.414	20	100	100	TCGAGACGCATTGGAACCAA	59.966	20	100	100	120	121	240	CGAAAACTTCAGCGCCTCAA	59.414	20	100	100	TGTCATACGGGCCAAGATCG	59.896	20	95	100	137	121	257	CGAAAACTTCAGCGCCTCAA	59.414	20	100	100	TGGTTTGTCATACGGGCCAA	59.889	20	95	100	142	121	262
CPSSR_57|AG	AGCTGAACTGGCAAATTGGC	59.681	20	N/A	N/A	GCGGGCTTGATGTTTTGAGA	59.119	20	94.4	90	170	131	300	AGCTGAACTGGCAAATTGGC	59.681	20	N/A	N/A	AGCGGGCTTGATGTTTTGAG	59.116	20	N/A	N/A	171	131	301	AAGTCCATGGCAGCTGAACT	59.597	20	100	90	GCGGGCTTGATGTTTTGAGA	59.119	20	94.4	90	181	120	300
CPSSR_58|AG	GGCGGCCATAGGTGTATTCA	59.892	20	100	100	GCAGGTTGATGCTGCAAAGA	59.4	20	100	100	159	155	313	TGGCGGCCATAGGTGTATTC	59.892	20	100	100	GCAGGTTGATGCTGCAAAGA	59.4	20	100	100	160	154	313	GATTGGCGGCCATAGGTGTA	59.892	20	100	100	GCAGGTTGATGCTGCAAAGA	59.4	20	100	100	163	151	313
CPSSR_59|AG	GTGTGATGGGTTGTGGGAGT	59.89	20	100	85	ACCTAACAAAACATCCCTCTCTCA	59.402	24	100	100	156	120	275	TCGTGGAGTTGTCGTTGTGT	59.826	20	100	75	ACCTAACAAAACATCCCTCTCTCA	59.402	24	100	100	172	104	275	AGAGGAGGTGAGTGGTGAGG	60.252	20	100	55	ACCTAACAAAACATCCCTCTCTCA	59.402	24	100	100	195	81	275
CPSSR_60|AG	TTGGCGATGGAGGAACAGAC	60.036	20	100	100	ACTCCAACTGCGTGAGGAAG	59.966	20	100	100	170	161	330	GGCGATGGAGGAACAGACAT	59.821	20	100	100	ACTCCAACTGCGTGAGGAAG	59.966	20	100	100	168	163	330	GGAGGAACAGACATGGCGTT	60.322	20	100	100	ACTCCAACTGCGTGAGGAAG	59.966	20	100	100	162	169	330
CPSSR_61|AG	CCAAGTCAGCCCAAGTACGT	59.965	20	100	100	AGCTTCGTTTCTAGCCGAATCA	60.094	22	100	54.55	183	59	241	CCACGGTACTGCCCTCTTTT	59.964	20	100	100	AGCTTCGTTTCTAGCCGAATCA	60.094	22	100	54.55	126	116	241	CCAAGTCAGCCCAAGTACGT	59.965	20	100	100	GCTTCGTTTCTAGCCGAATCA	58.732	21	100	57.14	182	59	240
CPSSR_62|AG	GGTTAATGCATAGCGGCCTCT	60.543	21	100	100	CATGACTTTGTACACATGCAAG	56.261	22	100	68.18	173	175	347	GTTAATGCATAGCGGCCTCT	58.116	20	100	100	CATGACTTTGTACACATGCAAG	56.261	22	100	68.18	172	176	347	GTTAATGCATAGCGGCCTCT	58.116	20	100	100	CATGACTTTGTACACATGCA	54.223	20	100	65	172	176	347
CPSSR_63|AG	GGTTAATGCATAGCGGCCTCT	60.543	21	100	100	CATGACTTTGTACACATGCAAG	56.261	22	100	68.18	173	175	347	GTTAATGCATAGCGGCCTCT	58.116	20	100	100	CATGACTTTGTACACATGCAAG	56.261	22	100	68.18	172	176	347	GTTAATGCATAGCGGCCTCT	58.116	20	100	100	CATGACTTTGTACACATGCA	54.223	20	100	65	172	176	347
CPSSR_64|AG	GCAATTCGATGTGGCAACCA	59.757	20	100	100	CAATACCACCAGGCTGCGT	60.377	19	100	100	165	3	167	AGCAATTCGATGTGGCAACC	59.472	20	100	100	CAATACCACCAGGCTGCGT	60.377	19	100	100	166	2	167	GCAATTCGATGTGGCAACCA	59.757	20	100	100	TCAATACCACCAGGCTGCGT	61.837	20	100	100	166	3	168
CPSSR_65|AG	AGTGGGTGTTTGAGACAGACA	59.163	21	100	100	TGCCTCTCAAGCTGCTCATC	60.108	20	95	100	122	166	287	GAGGGGAAGAGGGAGCGATA	60.179	20	100	100	TCGATCTGATCTGCCCTCAA	58.219	20	100	100	191	64	254	AGTGGGTGTTTGAGACAGACA	59.163	21	100	100	GCCTCTCAAGCTGCTCATCT	59.821	20	95	100	121	166	286
CPSSR_66|AG	AATGGCAGAGGTGTGTCCAG	59.963	20	100	100	TGTCTCAAGGATGTGGTTTGGA	59.559	22	100	90.91	184	143	326	GGCAGAGGTGTGTCCAGTAG	59.752	20	100	100	TGTCTCAAGGATGTGGTTTGGA	59.559	22	100	90.91	181	146	326	CAATGGCAGAGGTGTGTCCA	60.251	20	100	100	TGTCTCAAGGATGTGGTTTGGA	59.559	22	100	90.91	185	142	326
CPSSR_67|AG	AATGGCAGAGGTGTGTCCAG	59.963	20	100	100	TGTCTCAAGGATGTGGTTTGGA	59.559	22	100	90.91	187	143	329	GGCAGAGGTGTGTCCAGTAG	59.752	20	100	100	TGTCTCAAGGATGTGGTTTGGA	59.559	22	100	90.91	184	146	329	CAATGGCAGAGGTGTGTCCA	60.251	20	100	100	TGTCTCAAGGATGTGGTTTGGA	59.559	22	100	90.91	188	142	329
CPSSR_68|AG	AGAAACGAAGAACGCGTGGA	60.249	20	100	100	CGCAATCGCTCCTCTTCTCT	59.898	20	100	100	125	57	181	AGAAACGAAGAACGCGTGGA	60.249	20	100	100	ACGCAATCGCTCCTCTTCTC	60.179	20	100	100	126	57	182	ACGAAGAACGCGTGGATTTG	59.489	20	100	100	CGCAATCGCTCCTCTTCTCT	59.898	20	100	100	121	61	181
CPSSR_69|AG	ATAAGTTGCCGAGCGTTGGA	60.037	20	95	100	TGCCCGTTCTTACATAAAAGGA	57.711	22	100	100	183	104	286	GGCTGCTGTGAAGCTGTAGA	60.037	20	100	100	TGCCCGTTCTTACATAAAAGGA	57.711	22	100	100	118	169	286	ATAAGTTGCCGAGCGTTGGA	60.037	20	95	100	ACATTTGCCCGTTCTTACAT	55.628	20	100	100	188	104	291
CPSSR_70|AG	GCACCACTACCAGCTGTTCT	59.965	20	100	80	TGGAATAAGAGAGAGCATGCAG	57.931	22	100	81.82	170	74	243	AGCACCACTACCAGCTGTTC	59.965	20	100	85	TGGAATAAGAGAGAGCATGCAG	57.931	22	100	81.82	171	73	243	ATAAGTTGCCGAGCGTTGGA	60.037	20	95	100	TGGAATAAGAGAGAGCATGCAG	57.931	22	100	81.82	140	104	243
CPSSR_71|AGA	CCGGGTGGATCTTATGGCAA	59.817	20	N/A	N/A	AAGGCGTCACCGTGTTTACT	59.895	20	100	100	183	109	291	TTGCCGGGTGGATCTTATGG	59.817	20	N/A	N/A	AAGGCGTCACCGTGTTTACT	59.895	20	100	100	186	106	291	CCGGGTGGATCTTATGGCAA	59.817	20	N/A	N/A	CAAGGCGTCACCGTGTTTAC	59.766	20	100	100	184	109	292
CPSSR_72|AGA	AGCGAGGAGGTGAAGGAGAT	60.033	20	100	100	TCCTAGCAGAAATGCACGCA	60.036	20	100	100	149	139	287	TGCTCCGATGCTGTTGGAAT	60.035	20	94.4	90	TCCTAGCAGAAATGCACGCA	60.036	20	100	100	174	114	287	GCGAGGAGGTGAAGGAGATG	59.896	20	100	100	TCCTAGCAGAAATGCACGCA	60.036	20	100	100	148	140	287
CPSSR_73|AGA	GCAAGAATGCGACATTTGTGT	58.335	21	100	100	TCGGTGTCCCAAACCTCTTT	59.159	20	100	100	160	150	309	ACTCTAGTCTCTGCTGCAAGA	58.199	21	100	100	TCGGTGTCCCAAACCTCTTT	59.159	20	100	100	175	135	309	AGAATGCGACATTTGTGTTCCA	59.116	22	100	100	TCGGTGTCCCAAACCTCTTT	59.159	20	100	100	157	153	309
CPSSR_74|AGA	GCAAGAATGCGACATTTGTGT	58.335	21	100	100	TCGGTGTCCCAAACCTCTTT	59.159	20	100	100	160	150	309	ACTCTAGTCTCTGCTGCAAGA	58.199	21	100	100	TCGGTGTCCCAAACCTCTTT	59.159	20	100	100	175	135	309	AGAATGCGACATTTGTGTTCCA	59.116	22	100	100	TCGGTGTCCCAAACCTCTTT	59.159	20	100	100	157	153	309
CPSSR_75|AGA	ACAGCTCCAAACAGCACTGA	59.819	20	100	100	AAGGCCCTTCTTTGCTGAGG	60.252	20	100	80	199	153	351	ACACAGCTCCAAACAGCACT	60.107	20	100	100	GCCCTTCTTTGCTGAGGAGA	59.674	20	100	95	198	151	348	ACAGCTCCAAACAGCACTGA	59.819	20	100	100	GCCCTTCTTTGCTGAGGAGA	59.674	20	100	95	196	153	348
CPSSR_76|AGA	GGGTTTTAACAGGCGGAGGA	59.963	20	100	100	TCCATTCTCTCCCCAGCTCT	59.659	20	100	100	103	169	271	GGGTTTTAACAGGCGGAGGA	59.963	20	100	100	CCATTCTCTCCCCAGCTCTC	59.242	20	100	100	102	169	270	AGCTTAACCGCTTCCATGGA	59.382	20	100	100	TCCCCAGCTCTCTCAACCTT	60.179	20	100	100	200	63	262
CPSSR_77|AGA	CTCGTTTCATGGGAGGCTGT	60.036	20	100	100	TGGTCCTTTTGCAGCCTAACA	60.134	21	100	100	200	114	313	CTCGTTTCATGGGAGGCTGT	60.036	20	100	100	TCAGCCTCCGAATCATCAGT	58.511	20	100	90	167	114	280	CTCGTTTCATGGGAGGCTGT	60.036	20	100	100	GGTCCTTTTGCAGCCTAACA	58.384	20	100	100	199	114	312
CPSSR_78|AGA	CGTCGTTGCTATGCGATGAG	59.5	20	100	100	GGGTATAGCGCCAGTGATCC	60.037	20	100	100	195	100	294	CGTCGTTGCTATGCGATGAG	59.5	20	100	100	ATAGCGCCAGTGATCCATCG	60.038	20	100	100	191	100	290	CGTCGTTGCTATGCGATGAG	59.5	20	100	100	GCGCCAGTGATCCATCGATA	60.038	20	100	100	188	100	287
CPSSR_79|AGA	GCCCGTCCATCAATTTACGC	59.971	20	100	80	GCACCTGTACCAACCTTCGA	59.966	20	100	100	140	97	236	TCAATCCGAACAGCCAGTCC	60.036	20	100	100	GCACCTGTACCAACCTTCGA	59.966	20	100	100	176	61	236	GCCCGTCCATCAATTTACGC	59.971	20	100	80	CTCGTGGAGAGCCTCTGTTC	59.828	20	100	100	167	97	263
CPSSR_80|AGA	GTGAGTGACACCACCGTCAT	59.966	20	100	100	GTCTCGCAACGTCTTCTCCA	60.039	20	95	100	187	167	353	AGTCGGAGAGTGGTGAGTGA	59.889	20	100	100	GTCTCGCAACGTCTTCTCCA	60.039	20	95	100	199	155	353	TCGGAGAGTGGTGAGTGACA	60.179	20	100	100	GTCTCGCAACGTCTTCTCCA	60.039	20	95	100	197	157	353
CPSSR_81|AGA	CCCCAATCCGACGAAGAAGA	59.465	20	95	100	GCCGCGATGAAACAGAGAGA	60.459	20	N/A	N/A	191	181	371	CCCCAATCCGACGAAGAAGA	59.465	20	95	100	AGCCGCGATGAAACAGAGAG	60.459	20	100	45	192	181	372	CCCCAATCCGACGAAGAAGA	59.465	20	95	100	CAGCCGCGATGAAACAGAGA	60.737	20	N/A	N/A	193	181	373
CPSSR_82|AGA	ATTTCTCGCCCCGCACTAAA	60.036	20	100	80	CGGAGCATCGTCGCATAGAT	60.11	20	100	100	157	88	244	ATTTCTCGCCCCGCACTAAA	60.036	20	100	80	GTGGTGGAAGAGACGACTCG	60.11	20	95	100	198	88	285	GATTTCTCGCCCCGCACTAA	60.461	20	100	85	CGGAGCATCGTCGCATAGAT	60.11	20	100	100	158	87	244
CPSSR_83|AGA	TCGGTTCAACTTGGGACTCG	59.967	20	100	100	TTCCAAAAGCCACCGGTGAA	60.396	20	N/A	N/A	192	56	247	TCGGTTCAACTTGGGACTCG	59.967	20	100	100	TTTCCAAAAGCCACCGGTGA	60.396	20	N/A	N/A	193	56	248	TCAACTTGGGACTCGCCTTC	59.965	20	100	100	TTCCAAAAGCCACCGGTGAA	60.396	20	N/A	N/A	187	61	247
CPSSR_84|AGA	GATTCCGGTCCTGCAAATGC	59.899	20	100	100	GTCCCCTCCGTACTCTCTGT	60.034	20	95	100	183	90	272	ATTGCGGATGTGACGTTGGA	60.321	20	100	100	GTCCCCTCCGTACTCTCTGT	60.034	20	95	100	149	124	272	CTGGATTCCGGTCCTGCAAA	60.322	20	100	100	GTCCCCTCCGTACTCTCTGT	60.034	20	95	100	186	87	272
CPSSR_85|AGA	AGCCACCTTCAACACTGTCA	59.454	20	100	100	CCAGCCCACCTTGTCACATA	59.672	20	100	100	170	181	350	TGAGCCACCTTCAACACTGT	59.454	20	100	100	CCAGCCCACCTTGTCACATA	59.672	20	100	100	172	179	350	TTGAGCCACCTTCAACACTGT	60.065	21	100	100	CCAGCCCACCTTGTCACATA	59.672	20	100	100	173	178	350
CPSSR_86|AGA	CTCGCACCATTGGAGGACTT	60.036	20	100	100	CATTTGCAGAGGGAGTGCCA	60.61	20	100	100	185	59	243	ACTTGGGCAGCCTGCTTTAT	59.96	20	100	100	CATTTGCAGAGGGAGTGCCA	60.61	20	100	100	169	75	243	GGACCTCAGCATGCAGGAAT	60.107	20	100	100	CATTTGCAGAGGGAGTGCCA	60.61	20	100	100	107	137	243
CPSSR_87|AGA	CTCGCACCATTGGAGGACTT	60.036	20	100	100	CATTTGCAGAGGGAGTGCCA	60.61	20	100	100	185	59	243	ACTTGGGCAGCCTGCTTTAT	59.96	20	100	100	CATTTGCAGAGGGAGTGCCA	60.61	20	100	100	169	75	243	GGACCTCAGCATGCAGGAAT	60.107	20	100	100	CATTTGCAGAGGGAGTGCCA	60.61	20	100	100	107	137	243
CPSSR_88|AGA	CTCGCACCATTGGAGGACTT	60.036	20	100	100	CATTTGCAGAGGGAGTGCCA	60.61	20	100	100	185	59	243	ACTTGGGCAGCCTGCTTTAT	59.96	20	100	100	CATTTGCAGAGGGAGTGCCA	60.61	20	100	100	169	75	243	GGACCTCAGCATGCAGGAAT	60.107	20	100	100	CATTTGCAGAGGGAGTGCCA	60.61	20	100	100	107	137	243
CPSSR_89|AGA	GCTGCGGAGTTTTCATGCAA	60.039	20	100	100	TCTTCAAATTCGCTCTCCGA	56.97	20	95	100	148	97	244	AGACCCTAATCTCCCTGGCT	59.355	20	100	100	CTTCTTCTTCGTCGTGTTCGA	58.353	21	100	100	200	122	321	ACCCTAATCTCCCTGGCTTCT	59.99	21	100	100	TCTTCTTCTTCGTCGTGTTCGA	59.711	22	100	100	199	124	322
CPSSR_90|AGAAC	TCCCTCAAGAATTCCTGCACT	59.012	21	100	100	TCCTCCACCTCGTCACGTAA	60.251	20	100	100	177	133	309	TCCCTCAAGAATTCCTGCACT	59.012	21	100	100	CCTCCACCTCGTCACGTAAA	59.4	20	100	100	176	133	308	TCCCTCAAGAATTCCTGCACT	59.012	21	100	100	CTGTCTCCTCCACCTCGTCA	60.609	20	100	100	182	133	314
CPSSR_91|AGACGA	TCGCACTTGTCCTGACCTTC	59.966	20	100	100	GCAACCGTTGAGACCGTTTC	60.042	20	100	100	169	139	307	CTCGCACTTGTCCTGACCTT	59.966	20	100	100	GCAACCGTTGAGACCGTTTC	60.042	20	100	100	170	138	307	TCGCACTTGTCCTGACCTTC	59.966	20	100	100	TTACGTGGCAACCGTTGAGA	59.896	20	100	100	176	139	314
CPSSR_92|AGACGA	TCGCACTTGTCCTGACCTTC	59.966	20	100	100	GCAACCGTTGAGACCGTTTC	60.042	20	100	100	175	139	313	CTCGCACTTGTCCTGACCTT	59.966	20	100	100	GCAACCGTTGAGACCGTTTC	60.042	20	100	100	176	138	313	TCGCACTTGTCCTGACCTTC	59.966	20	100	100	TTACGTGGCAACCGTTGAGA	59.896	20	100	100	182	139	320
CPSSR_93|AGAT	GGAAGGCCTGATACATGCGA	59.893	20	95	100	CCACTTGTGCCACCATCGAT	60.678	20	100	100	149	162	310	TGGGAAGGCCTGATACATGC	59.817	20	95	100	CCACTTGTGCCACCATCGAT	60.678	20	100	100	151	160	310	CTGTGCTGCCTGAACATGTG	59.76	20	100	100	CCACTTGTGCCACCATCGAT	60.678	20	100	100	197	114	310
CPSSR_94|AGAT	CAGAAGTCTGTGCTGCCTGA	59.966	20	95	100	CGACTCCACAGAGCTGGTTT	59.966	20	94.7	95	179	107	285	GCACCTCAGAAGTCTGTGCT	59.965	20	95	100	CGACTCCACAGAGCTGGTTT	59.966	20	94.7	95	185	101	285	GGAAGGCCTGATACATGCGA	59.893	20	95	100	CGACTCCACAGAGCTGGTTT	59.966	20	94.7	95	124	162	285
CPSSR_95|AGC	CGGTTAGTCCTCCTACGTGGA	60.68	21	100	100	ATGCTGGAGCTGCTGAAACT	59.962	20	100	85	127	180	306	TCGGTTAGTCCTCCTACGTG	58.257	20	100	100	ATGCTGGAGCTGCTGAAACT	59.962	20	100	85	128	179	306	ACCCGAGAGAAACTTGCACT	59.241	20	100	100	AGATGCTGATGCTGATGCTGA	59.859	21	100	95.24	199	38	236
CPSSR_96|AGC	AAGAGACTGCCCCACAAGTG	59.891	20	100	100	GGAGGGGTTTGAAGGGCAAT	60.252	20	100	100	196	111	306	CCAAAGAGACTGCCCCACAA	60.179	20	100	100	GGAGGGGTTTGAAGGGCAAT	60.252	20	100	100	199	108	306	TCCATTGGACCACCTGCTTC	59.962	20	100	100	ATTTTCCCTTGGTCCACCGT	59.519	20	100	100	178	82	259
CPSSR_97|AGG	TTCTGGCGGAATCGTAGTCG	59.9	20	100	80	CCCGTATCCGAAGCTCGATC	60.11	20	95	100	181	68	248	GGTTCTCTCGCCATTTCGGA	60.108	20	100	100	CCCGTATCCGAAGCTCGATC	60.11	20	95	100	138	111	248	TTCTGGCGGAATCGTAGTCG	59.9	20	100	80	GATTACGCCCCGTATCCGAA	59.685	20	100	100	189	68	256
CPSSR_98|AGG	TTCTGGCGGAATCGTAGTCG	59.9	20	100	80	CCCGTATCCGAAGCTCGATC	60.11	20	95	100	181	68	248	GGTTCTCTCGCCATTTCGGA	60.108	20	100	100	CCCGTATCCGAAGCTCGATC	60.11	20	95	100	138	111	248	TTCTGGCGGAATCGTAGTCG	59.9	20	100	80	GATTACGCCCCGTATCCGAA	59.685	20	100	100	189	68	256
CPSSR_99|AGG	ACGGTCGGGATGGTACGATA	60.179	20	100	100	CGACATCGTCACGTTTCAGC	59.909	20	95	100	187	167	353	ACGGTCGGGATGGTACGATA	60.179	20	100	100	GCGACATCGTCACGTTTCAG	59.909	20	95	100	188	167	354	CGGTCGGGATGGTACGATAG	59.48	20	100	100	CGACATCGTCACGTTTCAGC	59.909	20	95	100	186	168	353
CPSSR_100|AGG	ACGGTCGGGATGGTACGATA	60.179	20	100	100	CGACATCGTCACGTTTCAGC	59.909	20	95	100	187	167	353	ACGGTCGGGATGGTACGATA	60.179	20	100	100	GCGACATCGTCACGTTTCAG	59.909	20	95	100	188	167	354	CGGTCGGGATGGTACGATAG	59.48	20	100	100	CGACATCGTCACGTTTCAGC	59.909	20	95	100	186	168	353
CPSSR_101|AGG	AACTGCACCCAAGGGAGATG	59.961	20	100	100	TCACTTCAGCCAGCACTTCT	59.239	20	100	100	200	60	259	AACTGCACCCAAGGGAGATG	59.961	20	100	100	CACTTCAGCCAGCACTTCTG	59.127	20	100	100	199	60	258	AACTGCACCCAAGGGAGATG	59.961	20	100	100	ACTTCAGCCAGCACTTCTGC	60.888	20	100	100	198	60	257
CPSSR_102|AGT	GCTTTGCGCTCTTCATAGCC	59.971	20	100	100	TGGCCTCCTCTGACACTCAG	60.902	20	100	100	133	126	258	GCTTTGCGCTCTTCATAGCC	59.971	20	100	100	TGTGGCCTCCTCTGACACT	60.152	19	100	100	135	126	260	GCTTTGCGCTCTTCATAGCC	59.971	20	100	100	TGGCCTCCTCTGACACTCA	59.844	19	100	100	133	126	258
CPSSR_103|AGT	GCTTTGCGCTCTTCATAGCC	59.971	20	100	100	TGGCCTCCTCTGACACTCAG	60.902	20	100	100	133	126	258	GCTTTGCGCTCTTCATAGCC	59.971	20	100	100	TGTGGCCTCCTCTGACACT	60.152	19	100	100	135	126	260	GCTTTGCGCTCTTCATAGCC	59.971	20	100	100	TGGCCTCCTCTGACACTCA	59.844	19	100	100	133	126	258
CPSSR_104|AGT	GCGGAACCAATGACGTCATG	59.903	20	N/A	N/A	AGTACTGTGGCATGTAGTGAGC	60.094	22	100	100	178	63	240	TAGTCGGCGGAACCAATGAC	60.109	20	100	80	AGTACTGTGGCATGTAGTGAGC	60.094	22	100	100	184	57	240	CTAGTCGGCGGAACCAATGA	59.825	20	100	85	AGTACTGTGGCATGTAGTGAGC	60.094	22	100	100	185	56	240
CPSSR_105|AT	TCACATGCCAGAGCCAGATC	59.82	20	100	100	GGTGCCAATCGGGGAGATAG	59.965	20	100	100	111	137	247	CACATGCCAGAGCCAGATCT	59.819	20	100	100	GGTGCCAATCGGGGAGATAG	59.965	20	100	100	110	138	247	TCACATGCCAGAGCCAGATC	59.82	20	100	100	GCCAATCGGGGAGATAGACG	60.038	20	100	100	108	137	244
CPSSR_106|AT	GGCTTGTGCAAGTGAACACC	60.249	20	100	100	AGAAGCTGCTCCCAAGTGTC	59.964	20	100	85	140	164	303	GGCTTGTGCAAGTGAACACC	60.249	20	100	100	GAGAAGCTGCTCCCAAGTGT	59.964	20	100	90	141	164	304	GGCTTGTGCAAGTGAACACC	60.249	20	100	100	AGATGTCGGCAAGCCTTACC	60.108	20	100	100	174	164	337
CPSSR_107|AT	GGCTTGTGCAAGTGAACACC	60.249	20	100	100	AGAAGCTGCTCCCAAGTGTC	59.964	20	100	85	141	163	303	GGCTTGTGCAAGTGAACACC	60.249	20	100	100	GAGAAGCTGCTCCCAAGTGT	59.964	20	100	90	142	163	304	GGCTTGTGCAAGTGAACACC	60.249	20	100	100	AGATGTCGGCAAGCCTTACC	60.108	20	100	100	175	163	337
CPSSR_108|AT	GGATCTGTTCTGCCTGTGCT	60.036	20	100	100	ACGAGGAAGGCACTGGATTG	60.036	20	100	100	165	161	325	GGATCTGTTCTGCCTGTGCT	60.036	20	100	100	AATGACGAGGAAGGCACTGG	60.036	20	100	100	169	161	329	GGATCTGTTCTGCCTGTGCT	60.036	20	100	100	GACCAATGACGAGGAAGGCA	60.036	20	100	100	173	161	333
CPSSR_109|AT	GGATCTGTTCTGCCTGTGCT	60.036	20	100	100	ACGAGGAAGGCACTGGATTG	60.036	20	100	100	165	161	325	GGATCTGTTCTGCCTGTGCT	60.036	20	100	100	AATGACGAGGAAGGCACTGG	60.036	20	100	100	169	161	329	GGATCTGTTCTGCCTGTGCT	60.036	20	100	100	GACCAATGACGAGGAAGGCA	60.036	20	100	100	173	161	333
CPSSR_110|AT	TCCTTCTTCATTTGAGGCTCCA	59.356	22	100	86.36	TCAAGAGCTGCGATGAATGGA	59.792	21	100	100	121	153	273	TCCTTCTTCATTTGAGGCTCCA	59.356	22	100	86.36	AGAGCTGCGATGAATGGAAGT	59.791	21	100	100	118	153	270	TCCTTCTTCATTTGAGGCTCCAA	59.926	23	100	82.61	TCAAGAGCTGCGATGAATGGA	59.792	21	100	100	121	153	273
CPSSR_111|AT	TAGCTCTTCTCAGGCTGCCA	60.616	20	100	100	AGTGAAGCCTGCAGAACACA	59.819	20	100	100	187	136	322	TAGCTCTTCTCAGGCTGCCA	60.616	20	100	100	CCAGTGAAGCCTGCAGAACA	60.536	20	100	100	189	136	324	TAGCTCTTCTCAGGCTGCCA	60.616	20	100	100	CAGTGAAGCCTGCAGAACAC	59.41	20	100	100	188	136	323
CPSSR_112|AT	TGAGTCGTCTTAGTGTTCCAGT	58.78	22	100	100	AGCCAGCTTGACTGTTATGCT	59.996	21	100	100	184	80	263	AGTCGTCTTAGTGTTCCAGTTGT	59.616	23	100	100	AGCCAGCTTGACTGTTATGCT	59.996	21	100	100	182	82	263	AGTGTTCCAGTTGTTCAAACCA	58.573	22	100	100	AGCCAGCTTGACTGTTATGCT	59.996	21	100	100	173	91	263
CPSSR_113|AT	ACCTTGCCCAGTTCATTGGT	59.812	20	100	100	TGAAGGTTCACACTTGTGCA	57.879	20	N/A	N/A	187	163	349	ACCTTGCCCAGTTCATTGGT	59.812	20	100	100	AATGTGACTCAAGCCAGAGG	57.514	20	100	100	165	163	327	ACCTTGCCCAGTTCATTGGT	59.812	20	100	100	GATGAAGGTTCACACTTGTGCA	59.382	22	N/A	N/A	189	163	351
CPSSR_114|AT	CCAAAGTGCCACCTCCATCT	59.961	20	100	90	CTGGTTCTCGTGCCCTTCTT	59.965	20	100	100	146	145	290	CCAAAGTGCCACCTCCATCT	59.961	20	100	90	CCTTGCTCGTGATGGTCACT	60.037	20	100	80	181	145	325	ACCAAAGTGCCACCTCCATC	60.251	20	100	95	CTGGTTCTCGTGCCCTTCTT	59.965	20	100	100	147	144	290
CPSSR_115|AT	GCAAGTGAAAGGCAGGGTTG	59.967	20	100	100	ACATCCAAGGTAAGAATGCCCTT	59.988	23	100	100	178	145	322	AGCAAGTGAAAGGCAGGGTT	60.106	20	100	100	ACATCCAAGGTAAGAATGCCCTT	59.988	23	100	100	179	144	322	GCAAGTGAAAGGCAGGGTTG	59.967	20	100	100	GGTTTGACACCTAGTAAGCAAGC	59.811	23	100	100	133	145	277
CPSSR_116|AT	ACCAAGCCACAGTAATAGCA	56.828	20	100	100	GGTTTGGTATTGGATTTGTGAGCA	60.022	24	100	100	154	39	192	ACCAAGCCACAGTAATAGCA	56.828	20	100	100	TGGTTTGGTATTGGATTTGTGAGC	60.022	24	100	100	155	39	193	ATTGACTACCAAGCCACAGT	56.747	20	100	100	GGTTTGGTATTGGATTTGTGAGCA	60.022	24	100	100	161	32	192
CPSSR_117|AT	CCTTGTGATAGGACGTGCCA	59.751	20	100	100	CGCCGCTTACCACTTACTCT	59.827	20	100	100	197	42	238	CCTTGTGATAGGACGTGCCA	59.751	20	100	100	CCGCCGCTTACCACTTACTC	60.805	20	100	100	198	42	239	CCTTGTGATAGGACGTGCCAT	60.134	21	100	100	CGCCGCTTACCACTTACTCT	59.827	20	100	100	197	42	238
CPSSR_118|AT	CCTTGTGATAGGACGTGCCA	59.751	20	100	100	CGCCGCTTACCACTTACTCT	59.827	20	100	100	197	42	238	CCTTGTGATAGGACGTGCCA	59.751	20	100	100	CCGCCGCTTACCACTTACTC	60.805	20	100	100	198	42	239	CCTTGTGATAGGACGTGCCAT	60.134	21	100	100	CGCCGCTTACCACTTACTCT	59.827	20	100	100	197	42	238
CPSSR_119|AT	CACCGGATCTTGCTGCATTG	59.9	20	95	100	CCTAACATGCCTCGCCTCAA	60.108	20	100	100	173	176	348	CACCGGATCTTGCTGCATTG	59.9	20	95	100	GGTCGTCTCATACCCACACC	59.825	20	100	100	101	176	276	ACACCGGATCTTGCTGCATT	60.323	20	95	100	CCTAACATGCCTCGCCTCAA	60.108	20	100	100	174	175	348
CPSSR_120|AT	CACCGGATCTTGCTGCATTG	59.9	20	95	100	CCTAACATGCCTCGCCTCAA	60.108	20	100	100	173	176	348	CACCGGATCTTGCTGCATTG	59.9	20	95	100	GGTCGTCTCATACCCACACC	59.825	20	100	100	101	176	276	ACACCGGATCTTGCTGCATT	60.323	20	95	100	CCTAACATGCCTCGCCTCAA	60.108	20	100	100	174	175	348
CPSSR_121|AT	CACCGGATCTTGCTGCATTG	59.9	20	95	100	CCTAACATGCCTCGCCTCAA	60.108	20	100	100	173	176	348	CACCGGATCTTGCTGCATTG	59.9	20	95	100	GGTCGTCTCATACCCACACC	59.825	20	100	100	101	176	276	ACACCGGATCTTGCTGCATT	60.323	20	95	100	CCTAACATGCCTCGCCTCAA	60.108	20	100	100	174	175	348
CPSSR_122|AT	CACCGGATCTTGCTGCATTG	59.9	20	95	100	CCTAACATGCCTCGCCTCAA	60.108	20	100	100	173	176	348	CACCGGATCTTGCTGCATTG	59.9	20	95	100	GGTCGTCTCATACCCACACC	59.825	20	100	100	101	176	276	ACACCGGATCTTGCTGCATT	60.323	20	95	100	CCTAACATGCCTCGCCTCAA	60.108	20	100	100	174	175	348
CPSSR_123|AT	CAACAGAGCAAGGGACCAGT	59.891	20	100	100	AACCTCTCCCACATCCAACC	59.301	20	95	100	183	56	238	ACAACAGAGCAAGGGACCAG	59.891	20	100	100	AACCTCTCCCACATCCAACC	59.301	20	95	100	184	55	238	AGAGCAAGGGACCAGTCTCA	60.179	20	100	100	AACCTCTCCCACATCCAACC	59.301	20	95	100	179	60	238
CPSSR_124|AT	GGAAAGCCTGATGGGATGGT	59.74	20	100	100	TCCGGCACAGATGATGATGA	58.878	20	N/A	N/A	178	119	296	GGAAAGCCTGATGGGATGGT	59.74	20	100	100	ACAGAAGATTTCCGGCACAGA	59.652	21	N/A	N/A	188	119	306	AGGAAAGCCTGATGGGATGG	59.445	20	100	100	TCCGGCACAGATGATGATGA	58.878	20	N/A	N/A	179	118	296
CPSSR_125|AT	TGTACCTGCTTGTTGGCCTT	59.815	20	100	100	ACTGACGGTGAGAATATCGTGT	59.247	22	100	100	197	74	270	TGGCCTTTCATCTACGCCAA	59.673	20	95	100	ACTGACGGTGAGAATATCGTGT	59.247	22	100	100	184	87	270	ACCTGCTTGTTGGCCTTTCA	60.397	20	100	100	ACTGACGGTGAGAATATCGTGT	59.247	22	100	100	194	77	270
CPSSR_126|AT	AGATCACAATCTTTGCAGCACA	58.848	22	100	100	GGTGGCTCTTGAGCTTCACA	60.25	20	100	100	114	56	169	AGATCACAATCTTTGCAGCACA	58.848	22	100	100	TGGTGGCTCTTGAGCTTCAC	60.25	20	100	100	115	56	170	AGATCACAATCTTTGCAGCACA	58.848	22	100	100	TGGTATGGTGGCTCTTGAGC	59.747	20	100	100	120	56	175
CPSSR_127|AT	CGACTTGGGTGACGGATTGA	60.038	20	100	100	GGTCGCCTTTGCCTCCAAAA	61.46	20	100	100	164	35	198	CGACTTGGGTGACGGATTGA	60.038	20	100	100	GGTCGCCTTTGCCTCCAAA	60.901	19	100	100	164	35	198	CGACTTGGGTGACGGATTGA	60.038	20	100	100	TTTAATGGTCGCCTTTGCCT	58.082	20	100	100	170	35	204
CPSSR_128|AT	GCTCCAAGGATCCCAGGTTAC	60.134	21	100	100	ATCAAACATGCCCACGTCCA	60.251	20	100	100	188	133	320	GCTCCAAGGATCCCAGGTTA	58.787	20	100	100	ATCAAACATGCCCACGTCCA	60.251	20	100	100	188	133	320	GTTAGGCTCCAAGGATCCCA	58.787	20	100	100	ATCAAACATGCCCACGTCCA	60.251	20	100	100	193	128	320
CPSSR_129|AT	TCGACATCAGGAACCTGGTTG	59.998	21	100	100	AGCTAGCAGTCACCTCAACG	59.755	20	100	100	173	115	287	TGGCATGTGGTAAGGGCTTT	59.886	20	100	100	ACCTCAACGGCAGCCAAAA	60.455	19	100	100	192	85	276	TCGACATCAGGAACCTGGTT	58.652	20	100	100	AGCTAGCAGTCACCTCAACG	59.755	20	100	100	173	115	287
CPSSR_130|AT	AGCTTTTGTGTTCTTGGCTGA	58.622	21	100	100	TCTGGGGCAACTATAAGATAGT	55.77	22	100	90.91	162	128	289	GCTTTTGTGTTCTTGGCTGA	57.131	20	100	100	TCTGGGGCAACTATAAGATAGT	55.77	22	100	90.91	161	129	289	AGCTTTTGTGTTCTTGGCTGA	58.622	21	100	100	CTGGGGCAACTATAAGATAGT	54.203	21	100	95.24	161	128	288
CPSSR_131|ATC	TTGGCCTGATCCTGACAACC	59.962	20	100	100	AGAGATGCAGCAGGGGTTTC	60.035	20	100	100	138	104	241	TTGGCCTGATCCTGACAACC	59.962	20	100	100	AGATGCAGCAGGGGTTTCAA	59.887	20	100	100	136	104	239	TCACGAACCCACAAGAAGCA	59.821	20	100	100	AGAGATGCAGCAGGGGTTTC	60.035	20	100	100	178	64	241
CPSSR_132|ATC	TTGGCCTGATCCTGACAACC	59.962	20	100	100	AGAGATGCAGCAGGGGTTTC	60.035	20	100	100	138	104	241	TTGGCCTGATCCTGACAACC	59.962	20	100	100	AGATGCAGCAGGGGTTTCAA	59.887	20	100	100	136	104	239	TCACGAACCCACAAGAAGCA	59.821	20	100	100	AGAGATGCAGCAGGGGTTTC	60.035	20	100	100	178	64	241
CPSSR_133|ATC	GACAACACAACAGCAGAACCA	59.257	21	100	100	GTTTCTGATGCAGCCAAGGC	60.109	20	100	100	178	92	269	TGACAACACAACAGCAGAACC	59.257	21	100	100	GTTTCTGATGCAGCCAAGGC	60.109	20	100	100	179	91	269	ACAACACAACAGCAGAACCA	58.167	20	100	100	GTTTCTGATGCAGCCAAGGC	60.109	20	100	100	177	93	269
CPSSR_134|ATC	GCCTCCTCTTCCACCAACTT	59.598	20	100	100	ACCAAACCCACCAGCTAAACA	60.064	21	100	100	104	154	257	AAGCCTCCTCTTCCACCAAC	59.598	20	100	100	ACCAAACCCACCAGCTAAACA	60.064	21	100	100	106	152	257	AGCCTCCTCTTCCACCAACT	60.475	20	100	100	ACCAAACCCACCAGCTAAACA	60.064	21	100	100	105	153	257
CPSSR_135|ATC	TCCACTTCCTTCGTCAGCAC	59.966	20	100	100	AGTTGTTGAAGGCTGAACTGGA	60.092	22	100	100	176	131	306	CCACTTCCTTCGTCAGCACT	59.966	20	100	100	AGTTGTTGAAGGCTGAACTGGA	60.092	22	100	100	175	132	306	TCCACTTCCTTCGTCAGCAC	59.966	20	100	100	TGTTGAAGGCTGAACTGGATCA	59.894	22	100	100	173	131	303
CPSSR_136|ATC	CAAACGTCCATGGCACTTGG	60.039	20	N/A	N/A	ACGGAGGGCTAGGAAAGAGT	59.959	20	N/A	N/A	189	55	243	CCAAACGTCCATGGCACTTG	60.039	20	95	100	ACGGAGGGCTAGGAAAGAGT	59.959	20	N/A	N/A	190	54	243	CTCGTACTGCACCTCGTCTC	59.903	20	95	100	ACGGAGGGCTAGGAAAGAGT	59.959	20	N/A	N/A	161	83	243
CPSSR_137|ATC	TCGGAGTAACAAGAAGCGTTCT	59.705	22	95.5	100	CGGAGTTCCTCGCCTTGATT	60.108	20	100	100	194	59	252	CCAATCGGAGTAACAAGAAGCG	59.651	22	95.5	100	CGGAGTTCCTCGCCTTGATT	60.108	20	100	100	198	55	252	TCGGAGTAACAAGAAGCGTTC	58.331	21	95.2	100	CGGAGTTCCTCGCCTTGATT	60.108	20	100	100	194	59	252
CPSSR_138|ATG	TCATGGGCACTAGGGCAAAC	60.323	20	100	100	GCAAGCACAACTCATGCCAA	59.968	20	100	100	114	105	218	TCATGGGCACTAGGGCAAAC	60.323	20	100	100	GGGCTTGGAGTTGACGATGA	60.036	20	94.1	85	193	105	297	TCATGGGCACTAGGGCAAAC	60.323	20	100	100	GAGCAAGCACAACTCATGCC	60.109	20	100	100	116	105	220
CPSSR_139|ATG	TAACGGCCTTGGGAACTAGC	59.749	20	100	100	TACCCAACTCCAGCAAACCG	60.251	20	100	100	177	155	331	CTGCGAACGTCCCAAGGATA	59.825	20	100	80	CTTCAGGTGCCTTGGGATCA	59.671	20	95	100	174	94	267	TAACGGCCTTGGGAACTAGC	59.749	20	100	100	CCAACTCCAGCAAACCGTTC	59.689	20	100	100	174	155	328
CPSSR_140|CA	AACTGGGCCCTTGACAAACA	60.033	20	N/A	N/A	CACGTGTCCTGTCGAGTTGA	59.97	20	100	100	199	107	305	AACTGGGCCCTTGACAAACA	60.033	20	N/A	N/A	ACACGTGTCCTGTCGAGTTG	60.249	20	100	100	200	107	306	TGGGCCCTTGACAAACACAA	60.325	20	N/A	N/A	CACGTGTCCTGTCGAGTTGA	59.97	20	100	100	196	110	305
CPSSR_141|CA	CCCACAGTTCTCCCTTCTCC	59.384	20	95	100	TCAAACTCAAGACCCGCCAT	59.6	20	95	100	190	164	353	CCCACAGTTCTCCCTTCTCC	59.384	20	95	100	ACCCGCCATAGACTTTGAGG	59.458	20	95	100	179	164	342	CCCACAGTTCTCCCTTCTCC	59.384	20	95	100	ACTCAAGACCCGCCATAGAC	59.175	20	95	100	186	164	349
CPSSR_142|CA	TAGCAGAATCGCCTCGCTTT	59.824	20	100	100	ACTCCAACCCAACAACAGCA	60.034	20	100	55	181	101	281	TTAGCAGAATCGCCTCGCTT	59.824	20	100	100	ACTCCAACCCAACAACAGCA	60.034	20	100	55	182	100	281	TTTAGCAGAATCGCCTCGCT	59.824	20	100	100	ACTCCAACCCAACAACAGCA	60.034	20	100	55	183	99	281
CPSSR_143|CA	TAGCAGAATCGCCTCGCTTT	59.824	20	100	100	ACTCCAACCCAACAACAGCA	60.034	20	100	55	181	101	281	TTAGCAGAATCGCCTCGCTT	59.824	20	100	100	ACTCCAACCCAACAACAGCA	60.034	20	100	55	182	100	281	TTTAGCAGAATCGCCTCGCT	59.824	20	100	100	ACTCCAACCCAACAACAGCA	60.034	20	100	55	183	99	281
CPSSR_144|CA	TAGCAGAATCGCCTCGCTTT	59.824	20	100	100	ACTCCAACCCGACAACAACA	59.746	20	100	100	179	101	279	TTAGCAGAATCGCCTCGCTT	59.824	20	100	100	ACTCCAACCCGACAACAACA	59.746	20	100	100	180	100	279	TTTAGCAGAATCGCCTCGCT	59.824	20	100	100	ACTCCAACCCGACAACAACA	59.746	20	100	100	181	99	279
CPSSR_145|CA	TGTACAACACTGTTCCAATCCA	57.842	22	95.5	100	CATGCAGATGGACGGGGAAC	61.098	20	100	100	187	132	318	TGTACAACACTGTTCCAATCCA	57.842	22	95.5	100	CATGCAGATGGACGGGGAA	59.776	19	100	100	187	132	318	TGTACAACACTGTTCCAATCCA	57.842	22	95.5	100	ATGCAGATGGACGGGGAAC	59.775	19	100	100	186	132	317
CPSSR_146|CA	TGTACAACACTGTTCCAATCCA	57.842	22	95.5	100	CAGATGGATGGGGAGCCATG	60.251	20	90	100	183	132	314	TGTTCCAAATGCATTCTAGGGA	57.685	22	100	100	ACTTAGAGGTGGGCAGTGGA	60.179	20	N/A	N/A	189	160	348	TGTTCCAAATGCATTCTAGGGA	57.685	22	100	100	CAGATGGATGGGGAGCCATG	60.251	20	90	100	155	160	314
CPSSR_147|CA	TGTACAACACTGTTCCAATCCA	57.842	22	95.5	100	CATGCAGATGGACGGGGAAC	61.098	20	100	100	187	132	318	TGTACAACACTGTTCCAATCCA	57.842	22	95.5	100	CATGCAGATGGACGGGGAA	59.776	19	100	100	187	132	318	TGTACAACACTGTTCCAATCCA	57.842	22	95.5	100	ATGCAGATGGACGGGGAAC	59.775	19	100	100	186	132	317
CPSSR_148|CA	TGTACAACACTGTTCCAATCCA	57.842	22	95.5	100	CAGATGGATGGGGAGCCATG	60.251	20	90	100	183	132	314	TGTTCCAAATGCATTCTAGGGA	57.685	22	100	100	ACTTAGAGGTGGGCAGTGGA	60.179	20	N/A	N/A	189	160	348	TGTTCCAAATGCATTCTAGGGA	57.685	22	100	100	CAGATGGATGGGGAGCCATG	60.251	20	90	100	155	160	314
CPSSR_149|CA	TGTACAACACTGTTCCAATCCA	57.842	22	95.5	100	CAGATGGATGGGGAGCCATG	60.251	20	90	100	183	132	314	TGTTCCAAATGCATTCTAGGGA	57.685	22	100	100	CAGATGGATGGGGAGCCATG	60.251	20	90	100	155	160	314	ACATGTTCCAAATGCATTCTAGGG	59.597	24	100	100	CAGATGGATGGGGAGCCATG	60.251	20	90	100	158	157	314
CPSSR_150|CA	TGTACAACACTGTTCCAATCCA	57.842	22	95.5	100	CAGATGGATGGGGAGCCATG	60.251	20	90	100	183	132	314	TGTTCCAAATGCATTCTAGGGA	57.685	22	100	100	ACTTAGAGGTGGGCAGTGGA	60.179	20	N/A	N/A	189	160	348	TGTTCCAAATGCATTCTAGGGA	57.685	22	100	100	CAGATGGATGGGGAGCCATG	60.251	20	90	100	155	160	314
CPSSR_151|CAA	AGTGGGATGGTTGGATTTGTGT	60.158	22	100	100	TTCTCCAAGCTGGTGGCAAA	60.106	20	100	100	164	154	317	AGTGGGATGGTTGGATTTGTGT	60.158	22	100	100	AGCTGGTGGCAAAGGAATGA	59.887	20	100	100	157	154	310	AGTGGGATGGTTGGATTTGTGT	60.158	22	100	100	ATTCTCCAAGCTGGTGGCAA	59.887	20	100	100	165	154	318
CPSSR_152|CAA	TACTACCCTGGCCATCACCA	59.957	20	100	100	GGGTTAGCAGGGCCAACTAA	59.67	20	95	100	197	105	301	CGCCACCAATCTTACAGGCT	60.393	20	95	100	TTGTTTGGAGGGCGCATAGT	59.962	20	100	100	159	174	332	CCAGCCATATCGCCACCAAT	60.538	20	100	100	TTGTTTGGAGGGCGCATAGT	59.962	20	100	100	169	164	332
CPSSR_153|CAA	CCGAGAACGAAAGCGAGGTA	59.83	20	N/A	N/A	TCTTGCTGACCTTTGGCCAA	60.106	20	100	100	122	153	274	CCGAGAACGAAAGCGAGGTA	59.83	20	N/A	N/A	CACCGCCGGCCTTAATATCA	60.25	20	100	100	184	153	336	CCGAGAACGAAAGCGAGGTA	59.83	20	N/A	N/A	ACACCGCCGGCCTTAATATC	60.25	20	100	100	185	153	337
CPSSR_154|CAA	CCGAGAACGAAAGCGAGGTA	59.83	20	N/A	N/A	TCTTGCTGACCTTTGGCCAA	60.106	20	100	100	122	153	274	CCGAGAACGAAAGCGAGGTA	59.83	20	N/A	N/A	CACCGCCGGCCTTAATATCA	60.25	20	100	100	184	153	336	CCGAGAACGAAAGCGAGGTA	59.83	20	N/A	N/A	ACACCGCCGGCCTTAATATC	60.25	20	100	100	185	153	337
CPSSR_155|CAA	CTCCGGTTCCACTGTATCGG	59.898	20	N/A	N/A	CCCCTCTCTTGCTGCTGTAC	60.108	20	100	100	145	180	324	CCTCATCAGCCCATTCCGTT	60.107	20	N/A	N/A	CCCCTCTCTTGCTGCTGTAC	60.108	20	100	100	200	125	324	CTCCGGTTCCACTGTATCGG	59.898	20	N/A	N/A	GGCACCGACTCGAACACTAT	59.827	20	100	100	181	180	360
CPSSR_156|CAA	ACCTTCCATTGCTCCCCTTG	59.96	20	100	100	CACCTCTTGGGCTGTCACTT	59.891	20	100	100	188	116	303	TGAGAGCCCAACACTCCAAC	59.891	20	100	100	CACCTCTTGGGCTGTCACTT	59.891	20	100	100	170	134	303	CCAACACTCCAACTGGCTCT	59.891	20	100	100	CACCTCTTGGGCTGTCACTT	59.891	20	100	100	163	141	303
CPSSR_157|CAA	AGCATGAGCCACGAGTTCAA	59.965	20	100	100	TCTTCACCGATCCTCGCAAG	59.827	20	100	100	107	138	244	AGCATGAGCCACGAGTTCAA	59.965	20	100	100	CTCTTCACCGATCCTCGCAA	59.827	20	100	100	108	138	245	CGCTTTCCGTCACCAGTAGT	60.039	20	100	100	TCTTCACCGATCCTCGCAAG	59.827	20	100	100	145	100	244
CPSSR_158|CAA	AGGGATGACGAGCCTCTTCT	60.033	20	100	100	TCTCACTTTTGCGCTCGTCT	59.968	20	100	100	161	138	298	AGGGATGACGAGCCTCTTCT	60.033	20	100	100	TCTCTCACTTTTGCGCTCGT	59.968	20	100	100	163	138	300	ACGTGGAAAGCGTAGGGATG	60.108	20	100	100	TCTCACTTTTGCGCTCGTCT	59.968	20	100	100	174	125	298
CPSSR_159|CAA	ACCACAACAGCATCAACAGC	59.33	20	100	100	GCACTGGAGCTCCATACGAA	59.824	20	100	100	144	181	324	ACCACAACAGCATCAACAGC	59.33	20	100	100	AAGCACTGGAGCTCCATACG	59.823	20	100	100	146	181	326	ACCACAACAGCATCAACAGC	59.33	20	100	100	GGTTCCACCGAATACGTGGA	59.753	20	100	100	190	181	370
CPSSR_160|CAC	GCCAAAACCTCAAGGCACAG	59.967	20	100	100	TCATCAATGTCGTCGCTCGT	59.83	20	100	100	165	21	185	AAGGCACAGATTCGCAGTCA	59.965	20	100	100	TCATCAATGTCGTCGCTCGT	59.83	20	100	100	154	32	185	TCAAGGCACAGATTCGCAGT	59.965	20	100	100	TCATCAATGTCGTCGCTCGT	59.83	20	100	100	156	30	185
CPSSR_161|CAC	GCCAAAACCTCAAGGCACAG	59.967	20	100	100	TCATCAATGTCGTCGCTCGT	59.83	20	100	100	165	21	185	AAGGCACAGATTCGCAGTCA	59.965	20	100	100	TCATCAATGTCGTCGCTCGT	59.83	20	100	100	154	32	185	TCAAGGCACAGATTCGCAGT	59.965	20	100	100	TCATCAATGTCGTCGCTCGT	59.83	20	100	100	156	30	185
CPSSR_162|CAC	CTTCGGATAGGCGTCCAGAC	59.969	20	100	100	AACAGCAACGGTCGATACGA	59.758	20	100	100	133	125	257	TCTTCGGATAGGCGTCCAGA	60.107	20	100	100	AACAGCAACGGTCGATACGA	59.758	20	100	100	134	124	257	CTTCGGATAGGCGTCCAGAC	59.969	20	100	100	ACCAACAGCAACGGTCGATA	59.681	20	100	100	136	125	260
CPSSR_163|CAG	CTGCAAACAGCCTACCTCCA	59.963	20	100	100	GATTACTGCCGGGGAAGAGG	59.893	20	100	100	196	123	318	CTGCAAACAGCCTACCTCCA	59.963	20	100	100	TGTTGCCTGCTGTTGTTGTG	59.827	20	100	100	113	123	235	CTGCAAACAGCCTACCTCCA	59.963	20	100	100	CCTGTTGCCTGCTGTTGTTG	60.249	20	100	100	115	123	237
CPSSR_164|CAG	CTGCAAACAGCCTACCTCCA	59.963	20	100	100	GATTACTGCCGGGGAAGAGG	59.893	20	100	100	196	123	318	CTGCAAACAGCCTACCTCCA	59.963	20	100	100	TGTTGCCTGCTGTTGTTGTG	59.827	20	100	100	113	123	235	CTGCAAACAGCCTACCTCCA	59.963	20	100	100	CCTGTTGCCTGCTGTTGTTG	60.249	20	100	100	115	123	237
CPSSR_165|CAG	CTGCAAACAGCCTACCTCCA	59.963	20	100	100	GATTACTGCCGGGGAAGAGG	59.893	20	100	100	196	123	318	CTGCAAACAGCCTACCTCCA	59.963	20	100	100	TGTTGCCTGCTGTTGTTGTG	59.827	20	100	100	113	123	235	CTGCAAACAGCCTACCTCCA	59.963	20	100	100	CCTGTTGCCTGCTGTTGTTG	60.249	20	100	100	115	123	237
CPSSR_166|CAG	CTTGGGGACGACGACAATGA	60.038	20	100	85	GGCCTTCAGTCTTTGCCTCT	59.963	20	95	100	190	89	278	CTTGGGGACGACGACAATGA	60.038	20	100	85	ACAGGCTTGGAGGGCAATTT	60.179	20	100	100	149	89	237	ATGGCGACCATGAACCCTTT	59.96	20	100	100	ACAGGCTTGGAGGGCAATTT	60.179	20	100	100	176	62	237
CPSSR_167|CAG	TGCAACTGGAGCCACTTCTT	59.817	20	100	100	TGTTGGGCTAGGAGTTGCTG	59.963	20	100	100	192	79	270	TGCAACTGGAGCCACTTCTT	59.817	20	100	100	ACTGTTGGGCTAGGAGTTGC	59.963	20	100	100	194	79	272	AACCACTTCACCACTGCCAT	59.814	20	100	95	TGTTGGGCTAGGAGTTGCTG	59.963	20	100	100	162	109	270
CPSSR_168|CAG	TGCAACTGGAGCCACTTCTT	59.817	20	100	100	TGTTGGGCTAGGAGTTGCTG	59.963	20	100	100	192	79	270	TGCAACTGGAGCCACTTCTT	59.817	20	100	100	ACTGTTGGGCTAGGAGTTGC	59.963	20	100	100	194	79	272	AACCACTTCACCACTGCCAT	59.814	20	100	95	TGTTGGGCTAGGAGTTGCTG	59.963	20	100	100	162	109	270
CPSSR_169|CAG	CCTCGCTTCTTCCAACACCA	60.25	20	95	100	CTCTTCAGACGCACGAACCA	60.319	20	100	100	136	109	244	ACCTCGCTTCTTCCAACACC	60.25	20	100	80	CTCTTCAGACGCACGAACCA	60.319	20	100	100	137	108	244	CCTCGCTTCTTCCAACACCA	60.25	20	95	100	CTTTGGTCCGATCGGAGGTG	60.46	20	100	80	199	109	307
CPSSR_170|CAG	AGAAGAGGGTGGTGTGTGTG	59.53	20	100	100	AGCTTTCAAAGAGTGGACACCA	60.092	22	95.5	100	127	41	167	GAAGAGGGTGGTGTGTGTGG	60.535	20	100	100	AGCTTTCAAAGAGTGGACACCA	60.092	22	95.5	100	126	42	167	GGTGGTGTGTGTGGTGCATA	60.536	20	100	100	AGCTTTCAAAGAGTGGACACCA	60.092	22	95.5	100	120	48	167
CPSSR_171|CAG	TCTCAGCTTCAAGGGCTTGG	59.963	20	100	100	GAGGACGACAGGCTAGTTGG	59.826	20	100	100	146	113	258	TCTCAGCTTCAAGGGCTTGG	59.963	20	100	100	CCTGACTGGTCAAGCCCAAA	60.179	20	100	100	188	113	300	TCTCAGCTTCAAGGGCTTGG	59.963	20	100	100	CGAGGACGACAGGCTAGTTG	60.179	20	100	100	147	113	259
CPSSR_172|CAGCT	TCCACTCCGGTGAAGGAAGA	60.179	20	100	100	AGTCACCTTTGCCGGATCTG	60.036	20	100	100	136	152	287	TCCACTCCGGTGAAGGAAGA	60.179	20	100	100	CAGAGTCACCTTTGCCGGAT	60.036	20	100	100	139	152	290	CCACTCCGGTGAAGGAAGAG	59.752	20	100	100	AGTCACCTTTGCCGGATCTG	60.036	20	100	100	135	153	287
CPSSR_173|CAT	GCCAGCTAATTCGCATCTTGA	59.057	21	N/A	N/A	GCATCACTGTCCCTGATCCA	59.457	20	N/A	N/A	174	128	301	GCCAGCTAATTCGCATCTTGA	59.057	21	N/A	N/A	TGCATCACTGTCCCTGATCC	59.457	20	N/A	N/A	175	128	302	AGCCAGCTAATTCGCATCTTG	59.055	21	95.2	100	GCATCACTGTCCCTGATCCA	59.457	20	N/A	N/A	175	127	301
CPSSR_174|CAT	GTGTAGCACGGACCTGCATA	59.825	20	100	100	AATTCCTCCTCGGCTGATGC	60.179	20	100	100	184	68	251	GCACGGACCTGCATATCCTT	60.179	20	100	100	AATTCCTCCTCGGCTGATGC	60.179	20	100	100	179	73	251	AGCTTCTCACCTGCATCAGC	60.393	20	100	85	ATGACAGGAGTGCGCTTGAA	59.965	20	100	100	151	181	331
CPSSR_175|CAT	TGGCATGGTGTGGAAGGATC	60.034	20	100	100	CATGCACTGTGGAGGGAAGT	59.963	20	100	100	138	158	295	TGGCATGGTGTGGAAGGATC	60.034	20	100	100	ACATGCACTGTGGAGGGAAG	59.963	20	100	100	139	158	296	TGGCATGGTGTGGAAGGATC	60.034	20	100	100	TGTGGAGGGAAGTCTGGACT	59.809	20	95	100	131	158	288
CPSSR_176|CAT	ACGGGTGACAGTGTGTTGTT	60.036	20	95	100	GTCAGGGTTAGGGACAAGCC	60.035	20	100	100	156	164	319	ACGGGTGACAGTGTGTTGTT	60.036	20	95	100	GGTTAGGGACAAGCCAAGCT	59.962	20	100	100	151	164	314	ATTTGTCGACACGGGTGACA	59.895	20	100	100	GTCAGGGTTAGGGACAAGCC	60.035	20	100	100	166	154	319
CPSSR_177|CAT	AAGACGGGCCTCATCAATCG	60.179	20	100	100	GCTGATCACTCTGCCAGGTT	60.036	20	95	100	144	150	293	CCTCATCAATCGCCCATCGT	60.25	20	100	85	GCTGATCACTCTGCCAGGTT	60.036	20	95	100	136	158	293	AAGACGGGCCTCATCAATCG	60.179	20	100	100	TCTGCCAGGTTTTCTGCACT	59.817	20	100	100	135	150	284
CPSSR_178|CCA	CCATTTGCTGCTGCTGACTC	59.829	20	100	100	CATCAGTGCAGGACGGTCTA	59.182	20	95	100	133	161	293	CATTTGCTGCTGCTGACTCG	60.179	20	100	95	CATCAGTGCAGGACGGTCTA	59.182	20	95	100	132	162	293	CCATTTGCTGCTGCTGACTC	59.829	20	100	100	CAGTGCAGGACGGTCTAAGA	59.111	20	95	100	130	161	290
CPSSR_179|CCA	GTGGTTCCTCTCTGCCACTC	60.037	20	100	100	CTTGGTCGGGCTTGATGTCT	60.036	20	100	100	173	73	245	GTGGTTCCTCTCTGCCACTC	60.037	20	100	100	TCTTGGTCGGGCTTGATGTC	60.036	20	100	100	174	73	246	TGCATCGTGGTTCCTCTCTG	59.753	20	100	100	CTTGGTCGGGCTTGATGTCT	60.036	20	100	100	179	67	245
CPSSR_180|CCA	GTGGTTCCTCTCTGCCACTC	60.037	20	100	100	CTTGGTCGGGCTTGATGTCT	60.036	20	100	100	173	73	245	GTGGTTCCTCTCTGCCACTC	60.037	20	100	100	TCTTGGTCGGGCTTGATGTC	60.036	20	100	100	174	73	246	TGCATCGTGGTTCCTCTCTG	59.753	20	100	100	CTTGGTCGGGCTTGATGTCT	60.036	20	100	100	179	67	245
CPSSR_181|CCA	CAGCTCCACCTCCGTCTCTA	60.394	20	100	100	GAGGCAGTAGTTGTGGCAGT	59.965	20	100	100	129	175	303	AGCTCCACCTCCGTCTCTAC	60.395	20	100	100	GAGGCAGTAGTTGTGGCAGT	59.965	20	100	100	128	176	303	CAGCTCCACCTCCGTCTCTA	60.394	20	100	100	CGAGACGGAGGCAGTAGTTG	60.179	20	100	100	136	175	310
CPSSR_182|CCA	CAGCTCCACCTCCGTCTCTA	60.394	20	100	100	GAGGCAGTAGTTGTGGCAGT	59.965	20	100	100	129	175	303	AGCTCCACCTCCGTCTCTAC	60.395	20	100	100	GAGGCAGTAGTTGTGGCAGT	59.965	20	100	100	128	176	303	CAGCTCCACCTCCGTCTCTA	60.394	20	100	100	CGAGACGGAGGCAGTAGTTG	60.179	20	100	100	136	175	310
CPSSR_183|CCA	CGTTTGATGACGCCGTTTGT	60.042	20	100	100	CCCCTCGTGGCTGATATGTC	59.966	20	100	100	124	153	276	CGTTTGATGACGCCGTTTGT	60.042	20	100	100	CAAGGTCCTGAGCATGAGCA	60.036	20	100	100	170	153	322	CGTTTGATGACGCCGTTTGT	60.042	20	100	100	TCTGAGGGAGGAGGTGACTG	59.96	20	100	100	103	153	255
CPSSR_184|CCA	CGTTTGATGACGCCGTTTGT	60.042	20	100	100	CCCCTCGTGGCTGATATGTC	59.966	20	100	100	124	153	276	CGTTTGATGACGCCGTTTGT	60.042	20	100	100	CAAGGTCCTGAGCATGAGCA	60.036	20	100	100	170	153	322	CGTTTGATGACGCCGTTTGT	60.042	20	100	100	TCTGAGGGAGGAGGTGACTG	59.96	20	100	100	103	153	255
CPSSR_185|CCA	CGTTTGATGACGCCGTTTGT	60.042	20	100	100	CCCCTCGTGGCTGATATGTC	59.966	20	100	100	124	153	276	CGTTTGATGACGCCGTTTGT	60.042	20	100	100	CAAGGTCCTGAGCATGAGCA	60.036	20	100	100	170	153	322	CGTTTGATGACGCCGTTTGT	60.042	20	100	100	TCTGAGGGAGGAGGTGACTG	59.96	20	100	100	103	153	255
CPSSR_186|CCA	GCTTCGTCGCAACAGCTTTT	60.317	20	100	100	CTTGTGACCCTGTCGTCCTC	60.038	20	N/A	N/A	199	118	316	GCTTCGTCGCAACAGCTTTT	60.317	20	100	100	GTCCTCCGCCGATTTTACCT	59.823	20	100	100	185	118	302	GCTTCGTCGCAACAGCTTTT	60.317	20	100	100	TCGTCCTCCGCCGATTTTAC	60.179	20	100	100	187	118	304
CPSSR_187|CCA	ACCAACAACCCTTCCTTCCC	59.812	20	100	100	AGGGTTAGGGTTTCCGAGGA	59.882	20	100	100	171	157	327	CAATCTCCGCACCAACAACC	59.759	20	100	100	AGGGTTAGGGTTTCCGAGGA	59.882	20	100	100	181	147	327	ACCAACAACCCTTCCTTCCC	59.812	20	100	100	TGGGGCTAGGGTTAGGGTTT	60.179	20	100	100	178	157	334
CPSSR_188|CCA	TCAGCTTCCTCACCACACAC	59.893	20	100	100	CCGGTTGAGGATTGTTTGGC	59.756	20	100	90	198	118	315	AGCTTCCTCACCACACACAC	60.179	20	100	100	CCGGTTGAGGATTGTTTGGC	59.756	20	100	90	196	120	315	CAGCTTCCTCACCACACACA	60.179	20	100	100	CCGGTTGAGGATTGTTTGGC	59.756	20	100	90	197	119	315
CPSSR_189|CCA	TGGTGGGTCTTGACAAAGGG	59.815	20	100	100	GTACAACACACTGGGGCTGA	59.892	20	100	100	178	164	341	GGTGGGTCTTGACAAAGGGT	59.815	20	100	100	GTACAACACACTGGGGCTGA	59.892	20	100	100	177	165	341	TGGTGGGTCTTGACAAAGGG	59.815	20	100	100	TACAACACACTGGGGCTGAG	59.604	20	100	100	177	164	340
CPSSR_190|CCA	CGCGGTGCCATATGTCCTAT	60.037	20	100	100	AGTCGTACTAGCGGTAGAGA	56.734	20	95	100	148	109	256	ACTCAACTCTCCTCTTCACTGC	59.701	22	100	100	ACCAGCAAAAGCAGAGACTCA	59.858	21	100	100	175	155	329	GAGGTCCCGTTCCATTTCGA	59.752	20	100	100	AGTCGTACTAGCGGTAGAGA	56.734	20	95	100	195	62	256
CPSSR_191|CCG	GTAAAACTCGGCTCCGTCGA	60.11	20	100	100	TGAGATCAGCAGGGGAGGAA	59.957	20	100	100	169	93	261	GTAAAACTCGGCTCCGTCGA	60.11	20	100	100	TCAGCAGGGGAGGAAGGAAT	60.253	20	100	100	164	93	256	GTAAAACTCGGCTCCGTCGA	60.11	20	100	100	ATCAGCAGGGGAGGAAGGAA	60.253	20	100	100	165	93	257
CPSSR_192|CCG	CGCCAGGTTCTTCACTGTGA	60.25	20	100	100	CGTCTCGGTCGGAAGTTGAA	60.04	20	100	100	119	153	271	GCATTGAAGGCATGGAGAGC	59.615	20	100	100	CGTCTCGGTCGGAAGTTGAA	60.04	20	100	100	199	73	271	TCATCCACTTCGCCACTTCG	60.39	20	100	90	CGTCTCGGTCGGAAGTTGAA	60.04	20	100	100	156	116	271
CPSSR_193|CCG	CGCCAGGTTCTTCACTGTGA	60.25	20	100	100	CGTCTCGGTCGGAAGTTGAA	60.04	20	100	100	119	153	271	GCATTGAAGGCATGGAGAGC	59.615	20	100	100	CGTCTCGGTCGGAAGTTGAA	60.04	20	100	100	199	73	271	TCATCCACTTCGCCACTTCG	60.39	20	100	90	CGTCTCGGTCGGAAGTTGAA	60.04	20	100	100	156	116	271
CPSSR_194|CCG	AGAACTTGCTCTCGCTGGTC	60.038	20	100	100	ACACGGCGAAAGATGTCGAT	60.109	20	100	100	115	161	275	GAGAACTTGCTCTCGCTGGT	60.038	20	100	100	ACACGGCGAAAGATGTCGAT	60.109	20	100	100	116	160	275	AGAACTTGCTCTCGCTGGTC	60.038	20	100	100	CGTCAAAACACGGCGAAAGA	59.698	20	100	100	122	161	282
CPSSR_195|CCT	CAACAGCAGCTAACCGCAAC	60.386	20	100	60	GTTGAGTTTGCTGGGAGGGT	60.179	20	100	100	147	95	241	CAACAGCAGCTAACCGCAAC	60.386	20	100	60	TGAGTTTGCTGGGAGGGTTT	59.444	20	100	100	145	95	239	CAACAGCAGCTAACCGCAAC	60.386	20	100	60	TTGAGTTTGCTGGGAGGGTT	59.444	20	100	100	146	95	240
CPSSR_196|CCT	CAACAGCAGCTAACCGCAAC	60.386	20	100	60	GTTGAGTTTGCTGGGAGGGT	60.179	20	100	100	147	95	241	CAACAGCAGCTAACCGCAAC	60.386	20	100	60	TGAGTTTGCTGGGAGGGTTT	59.444	20	100	100	145	95	239	CAACAGCAGCTAACCGCAAC	60.386	20	100	60	TTGAGTTTGCTGGGAGGGTT	59.444	20	100	100	146	95	240
CPSSR_197|CG	TGAAACTGTCAAGGAAGAGA	53.836	20	100	100	CCTCCAGGTCCTGATCATGA	58.201	20	100	100	190	132	321	CTGTTTCAGAAGTTGGGAACCA	58.713	22	100	86.36	CAACTCTCAAGTATGGTAGCAGT	57.922	23	100	100	200	63	262	CTGTTTCAGAAGTTGGGAACCA	58.713	22	100	86.36	ACTCTCAAGTATGGTAGCAGT	55.809	21	100	100	198	63	260
CPSSR_198|CGA	CGGATCCGAGGAGGTTTACG	59.97	20	100	100	AACGAGATCAAGCGGTCCAG	60.109	20	100	100	200	106	305	AAGCCGATCGGTGGAAGAAG	60.108	20	100	100	AACGAGATCAAGCGGTCCAG	60.109	20	100	100	170	136	305	AAGCCGATCGGTGGAAGAAG	60.108	20	100	100	GAACGAGATCAAGCGGTCCA	60.109	20	100	100	171	136	306
CPSSR_199|CGA	CGGATCCGAGGAGGTTTACG	59.97	20	100	100	AACGAGATCAAGCGGTCCAG	60.109	20	100	100	200	106	305	AAGCCGATCGGTGGAAGAAG	60.108	20	100	100	AACGAGATCAAGCGGTCCAG	60.109	20	100	100	170	136	305	AAGCCGATCGGTGGAAGAAG	60.108	20	100	100	GAACGAGATCAAGCGGTCCA	60.109	20	100	100	171	136	306
CPSSR_200|CGA	CGGATCCGAGGAGGTTTACG	59.97	20	100	100	AACGAGATCAAGCGGTCCAG	60.109	20	100	100	200	106	305	AAGCCGATCGGTGGAAGAAG	60.108	20	100	100	AACGAGATCAAGCGGTCCAG	60.109	20	100	100	170	136	305	AAGCCGATCGGTGGAAGAAG	60.108	20	100	100	GAACGAGATCAAGCGGTCCA	60.109	20	100	100	171	136	306
CPSSR_201|CGC	CGCCTACCAACATCCCTTGT	60.035	20	100	100	TCAATTTCCCTGGCGGAGTC	60.035	20	100	90	147	160	306	CATCCCTTGTCTGCTTCCGT	60.036	20	100	100	TCAATTTCCCTGGCGGAGTC	60.035	20	100	90	137	170	306	ACATCCCTTGTCTGCTTCCG	60.036	20	100	100	TCAATTTCCCTGGCGGAGTC	60.035	20	100	90	138	169	306
CPSSR_202|CGT	GACACCGACACCAAATCCCA	60.251	20	100	100	TGGGAGCTCGTCAACTCAAC	59.966	20	100	100	200	151	350	CACCGACACCAAATCCCAGT	60.251	20	100	100	TGGGAGCTCGTCAACTCAAC	59.966	20	100	100	198	153	350	CACCGACACCAAATCCCAGT	60.251	20	100	100	GTGGGAGCTCGTCAACTCAA	59.966	20	100	100	199	153	351
CPSSR_203|CT	CCCCACCCACCTCAAACAAA	60.398	20	95	100	GCGGAAACTAAGCCAGCGAT	61.09	20	100	95	149	176	324	CCCCACCCACCTCAAACAAA	60.398	20	95	100	GCGGAAACTAAGCCAGCGA	60.74	19	100	94.74	149	176	324	CCCCACCCACCTCAAACAAA	60.398	20	95	100	GCGGAAACTAAGCCAGCGATA	60.805	21	100	95.24	149	176	324
CPSSR_204|CT	TGACAGCTGATTTGGGTGTT	57.637	20	100	100	GACCACTCACTACATCGGCAT	59.863	21	100	100	173	159	331	TGACAGCTGATTTGGGTGTT	57.637	20	100	100	ACCACTCACTACATCGGCAT	58.805	20	100	100	172	159	330	TGACAGCTGATTTGGGTGTT	57.637	20	100	100	TGTTCCTGTTCCCCAAGTGA	58.782	20	100	100	131	159	289
CPSSR_205|CT	AGATCGCTCGTTGCCTTCTC	60.179	20	100	100	AGACGCAACGCCGAAAATTT	59.69	20	100	100	179	139	317	AGATCGCTCGTTGCCTTCTC	60.179	20	100	100	TTGGTCTCTCAGACGCAACG	60.319	20	100	75	189	139	327	AAGATCGCTCGTTGCCTTCT	59.752	20	100	100	AGACGCAACGCCGAAAATTT	59.69	20	100	100	180	138	317
CPSSR_206|CT	CCATCGTTTGCGCCATTTCT	59.829	20	100	100	TCGCAGAAACAGAGAGACAGT	59.043	21	N/A	N/A	154	169	322	TGCGCCATTTCTCTCTCCTC	59.823	20	95	100	TCGCAGAAACAGAGAGACAGT	59.043	21	N/A	N/A	146	177	322	GCGCCATTTCTCTCTCCTCT	59.536	20	95	100	TCGCAGAAACAGAGAGACAGT	59.043	21	N/A	N/A	145	178	322
CPSSR_207|CT	TTGCTGCTCTGCTCTGTGTT	60.179	20	100	100	TTCGCTCGAAGCCATCAGTT	60.037	20	100	100	199	173	371	TTTGCTGCTCTGCTCTGTGT	60.179	20	100	100	TTCGCTCGAAGCCATCAGTT	60.037	20	100	100	200	172	371	CTTCGTTTGCTGCTCTGCTC	59.834	20	100	100	GTTGCAACTCCGTGTTTGCT	59.899	20	100	100	188	167	354
CPSSR_208|CT	CAGGTCTAACAGCCTCCGAA	59.104	20	100	100	ACGGTGTCATCTGTGCACAA	60.179	20	100	100	195	71	265	AGACCAAACGAGATGGAGCA	59.023	20	95	100	ACGGTGTCATCTGTGCACAA	60.179	20	100	100	148	118	265	AGACCAAACGAGATGGAGCA	59.023	20	95	100	GAGAGGCTTGCATTGGGAGA	59.746	20	100	100	198	118	315
CPSSR_209|CT	CGCGACGAAGAGCAGAATCT	60.524	20	100	100	GGCACAGAAGAGAAGCCCAT	60.035	20	100	95	190	124	313	CGCGACGAAGAGCAGAATCT	60.524	20	100	100	TGCTCGGCACAGAAGAGAAG	60.038	20	95	100	195	124	318	CGCGACGAAGAGCAGAATCT	60.524	20	100	100	TGATGCTCGGCACAGAAGAG	60.108	20	95	100	198	124	321
CPSSR_210|CT	CGCGACGAAGAGCAGAATCT	60.524	20	100	100	GGCACAGAAGAGAAGCCCAT	60.035	20	100	95	190	124	313	CGCGACGAAGAGCAGAATCT	60.524	20	100	100	TGCTCGGCACAGAAGAGAAG	60.038	20	95	100	195	124	318	CGCGACGAAGAGCAGAATCT	60.524	20	100	100	TGATGCTCGGCACAGAAGAG	60.108	20	95	100	198	124	321
CPSSR_211|CT	CGTGGCGCAATTCTAAGCTG	60.248	20	100	100	CCGCGCTTTGATTTCTCGAG	59.974	20	100	100	197	29	225	CGTGGCGCAATTCTAAGCTG	60.248	20	100	100	CGCCATTAGACAACGCGATG	60.043	20	N/A	N/A	145	29	173	TTCGCCAAAGCAAGCACAAT	59.611	20	100	100	CCGCGCTTTGATTTCTCGAG	59.974	20	100	100	173	53	225
CPSSR_212|CT	CGTGGCGCAATTCTAAGCTG	60.248	20	100	100	CCGCGCTTTGATTTCTCGAG	59.974	20	100	100	197	29	225	CGTGGCGCAATTCTAAGCTG	60.248	20	100	100	CGCCATTAGACAACGCGATG	60.043	20	N/A	N/A	145	29	173	TTCGCCAAAGCAAGCACAAT	59.611	20	100	100	CCGCGCTTTGATTTCTCGAG	59.974	20	100	100	173	53	225
CPSSR_213|CT	CCAGTTGCGTCTTTGGTTCG	60.041	20	100	100	GGATTTCCCCACACCAGTGT	59.888	20	100	100	166	83	248	GCGTCTTTGGTTCGCTTAGC	60.179	20	95	100	GGATTTCCCCACACCAGTGT	59.888	20	100	100	160	89	248	CCAGTTGCGTCTTTGGTTCG	60.041	20	100	100	GGATAACCGCAGATGCAACG	59.695	20	100	100	100	83	182
CPSSR_214|CT	TTTGTCGCCTCCAGATGATG	57.972	20	100	100	TGAGCAGATCTGGAATTTGGACA	59.991	23	100	100	198	172	369	TTTTGTCGCCTCCAGATGATG	58.641	21	100	100	TGAGCAGATCTGGAATTTGGACA	59.991	23	100	100	199	171	369	TTTGTCGCCTCCAGATGATG	57.972	20	100	100	GAGCAGATCTGGAATTTGGACA	58.386	22	100	100	197	172	368
CPSSR_215|CT	ATGTCAGAGCAGTGCAGACC	60.037	20	100	100	AAGTGAGAGTGTGTGTGCGT	59.824	20	100	100	180	16	195	CCATGTCAGAGCAGTGCAGA	60.037	20	100	100	AAGTGAGAGTGTGTGTGCGT	59.824	20	100	100	182	14	195	TTCCAAGCCCCACTCAATCC	59.96	20	100	90	AAGTGAGAGTGTGTGTGCGT	59.824	20	100	100	125	71	195
CPSSR_216|CT	CAGGTCTAACAGCCTCCGAA	59.104	20	100	100	ACGGTGTCATCTGTGCACAA	60.179	20	100	100	195	71	265	AGACCAAACGAGATGGAGCA	59.023	20	95	100	ACGGTGTCATCTGTGCACAA	60.179	20	100	100	148	118	265	AGACCAAACGAGATGGAGCA	59.023	20	95	100	GAGAGGCTTGCATTGGGAGA	59.746	20	100	100	198	118	315
CPSSR_217|CT	GCACATGCACAGCACATCAA	60.039	20	100	100	CTGTTCCAGGCCCATGAGAG	60.107	20	100	100	152	79	230	TGCACAAAACAGCACATGCA	59.825	20	100	100	CTGTTCCAGGCCCATGAGAG	60.107	20	100	100	163	68	230	GCACATGCACAGCACATCAA	60.039	20	100	100	TTGTCTGTTCCAGGCCCATG	60.251	20	100	100	156	79	234
CPSSR_218|CT	TCGAGTCGCCGCTTTCATAG	60.248	20	100	100	TCATCACTCTCGTGCCCTAT	57.927	20	100	100	199	57	255	TCGAGTCGCCGCTTTCATAG	60.248	20	100	100	ATCATCACTCTCGTGCCCTA	57.927	20	100	100	200	57	256	CTCGAGTCGCCGCTTTCATA	60.248	20	100	100	TCATCACTCTCGTGCCCTAT	57.927	20	100	100	200	56	255
CPSSR_219|CT	ACGGGGATTCCACTTTTGCT	59.888	20	100	60	GCCCACTTTTGGCGAAAGAA	59.612	20	100	100	194	75	268	CCCCATTGGAGGAGAGCAAC	60.395	20	100	100	TCCCAAAACCCTTCCAACCC	60.105	20	100	80	158	170	327	CCCCATTGGAGGAGAGCAAC	60.395	20	100	100	CACTGCCGTCTCCACTCAAA	60.25	20	95	100	198	170	367
CPSSR_220|CT	ACGGGGATTCCACTTTTGCT	59.888	20	100	60	GCCCACTTTTGGCGAAAGAA	59.612	20	100	100	194	75	268	CCCCATTGGAGGAGAGCAAC	60.395	20	100	100	TGCCTTTTCTGAGCCCACTT	59.814	20	100	100	111	170	280	CCCCATTGGAGGAGAGCAAC	60.395	20	100	100	ATGCCTTTTCTGAGCCCACT	59.593	20	100	100	112	170	281
CPSSR_221|CT	GGGAGGCTCTGATTGGGAGA	60.692	20	100	100	CGCTTGAGAGTACTTGGGACT	59.454	21	100	100	164	105	268	GGGAGGCTCTGATTGGGAGA	60.692	20	100	100	ACGCTTGAGAGTACTTGGGA	58.371	20	100	100	165	105	269	GGGAGGCTCTGATTGGGAGA	60.692	20	100	100	CGCTTGAGAGTACTTGGGACTT	60.029	22	100	100	164	105	268
CPSSR_222|CT	GGGAGGCTCTGATTGGGAGA	60.692	20	100	100	CGCTTGAGAGTACTTGGGACT	59.454	21	100	100	164	105	268	GGGAGGCTCTGATTGGGAGA	60.692	20	100	100	ACGCTTGAGAGTACTTGGGA	58.371	20	100	100	165	105	269	GGGAGGCTCTGATTGGGAGA	60.692	20	100	100	CGCTTGAGAGTACTTGGGACTT	60.029	22	100	100	164	105	268
CPSSR_223|CT	CGGACCATCCATCCAACCTC	60.179	20	100	100	GCTGGCCTCATTCTTGTATTCC	59.379	22	100	100	198	103	300	TGCTGATGCATGCCTTCCAA	60.612	20	100	100	GCTGGCCTCATTCTTGTATTCC	59.379	22	100	100	175	126	300	GTACTCACCACGGACCATCC	59.825	20	100	55	TGAGTTGGATCTTTGGCTGAAC	58.851	22	100	100	148	93	240
CPSSR_224|CT	GCGAAAGAGAGACAGCACCA	60.32	20	100	100	GCTGCTGTTGTTGATCTGTGG	60.069	21	100	100	137	103	239	AGCAACAAGAACCCCACGTC	60.818	20	100	85	GCTGCTGTTGTTGATCTGTGG	60.069	21	100	100	101	139	239	GCGAAAGAGAGACAGCACCA	60.32	20	100	100	TGCTGCTGTTGTTGATCTGTG	59.395	21	100	100	138	103	240
CPSSR_225|CT	TTCTTCTCTCTCGGGCAACG	59.756	20	95	100	AGCTCCTGAGTGCGTTTCTC	60.038	20	N/A	N/A	162	105	266	TTCTTCTCTCTCGGGCAACG	59.756	20	95	100	GCTCCTGAGTGCGTTTCTCA	60.32	20	N/A	N/A	161	105	265	TTCTTCTCTCTCGGGCAACG	59.756	20	95	100	CAGCTCCTGAGTGCGTTTCT	60.32	20	N/A	N/A	163	105	267
CPSSR_226|CT	ATCGGACCTTCGCGAACATT	60.108	20	100	100	GGGGAATTCCACTCCGTCTG	60.108	20	100	100	196	127	322	TCTGGAACTCTCCCGAACCT	59.885	20	100	100	GGGGAATTCCACTCCGTCTG	60.108	20	100	100	177	146	322	ATCGGACCTTCGCGAACATT	60.108	20	100	100	GTTTGTACGGTCGCTTCGTG	59.84	20	100	100	127	127	253
CPSSR_227|CT	AAACATCTGCTGCAGCTTGC	60.039	20	100	100	ATGCTCACCTCCTTCGAAGC	60.108	20	100	95	196	113	308	AAACATCTGCTGCAGCTTGC	60.039	20	100	100	TTCGAAGCGTGCGATTCAAC	59.837	20	95	100	184	113	296	AAACATCTGCTGCAGCTTGC	60.039	20	100	100	CGATGCTCACCTCCTTCGAA	59.827	20	100	95	198	113	310
CPSSR_228|CT	TTGCGTCGTTGGTTCGGATA	60.038	20	100	100	GCTGGGACGCTCAGGATAAA	59.822	20	100	100	132	81	212	GTCGTTGGTTCGGATAGCCT	59.825	20	100	100	GCTGGGACGCTCAGGATAAA	59.822	20	100	100	128	85	212	TTGGTTCGGATAGCCTCTGC	59.822	20	100	100	GCTGGGACGCTCAGGATAAA	59.822	20	100	100	124	89	212
CPSSR_229|CT	GGTGCCTATTCCGGTAAACCA	60.065	21	95.2	100	CCATGAGCTGGCTTGAACCA	60.61	20	100	100	197	159	355	GATCGGTGCCTATTCCGGTA	59.036	20	N/A	N/A	GTGAATGGGCCCGATCTAGT	59.241	20	100	100	171	155	325	TCGGTGCCTATTCCGGTAAAC	60.135	21	95.2	100	CCATGAGCTGGCTTGAACCA	60.61	20	100	100	199	157	355
CPSSR_230|CT	TTCAAGCATGGCCTGAGGTT	59.887	20	100	100	ACGCGCTTTAACTTCAAACCC	60.002	21	94.4	85.71	181	149	329	TTCAAGCATGGCCTGAGGTT	59.887	20	100	100	CGCGCTTTAACTTCAAACCCA	60.002	21	94.7	90.48	180	149	328	AGCATGGCCTGAGGTTGATT	59.666	20	100	100	ACGCGCTTTAACTTCAAACCC	60.002	21	94.4	85.71	177	153	329
CPSSR_231|CTA	GGCCATTGCTGCAGTGTTAC	60.109	20	100	100	TTCCAGAGAAATGCCGGCTT	59.962	20	95	100	157	153	309	AGCTCCCAGACAGACCATCA	60.252	20	100	100	TTCCAGAGAAATGCCGGCTT	59.962	20	95	100	133	177	309	GGCCATTGCTGCAGTGTTAC	60.109	20	100	100	CACCTCCACCAACACTTCCA	59.817	20	100	100	172	153	324
CPSSR_232|CTC	GCTCCATCGTCTCAGACCAC	60.179	20	100	100	CTCCCGGCCGAAAATGTACT	60.108	20	100	100	198	99	296	TCCATCGTCTCAGACCACCA	60.252	20	100	100	CTCCCGGCCGAAAATGTACT	60.108	20	100	100	196	101	296	GCTCCATCGTCTCAGACCAC	60.179	20	100	100	GACCGTACGTCTTCCATCGG	60.248	20	95	100	176	99	274
CPSSR_233|CTC	AGAGGGAACAGGAACCAACT	58.179	20	100	85	TGGGCTTGCTGCAGATAACA	59.962	20	100	100	169	147	315	AGGGAACAGGAACCAACTTGA	59.15	21	100	95.24	TGGGCTTGCTGCAGATAACA	59.962	20	100	100	167	149	315	CACAGTAGAGGGAACAGGAACC	60.028	22	95.5	100	TGGGCTTGCTGCAGATAACA	59.962	20	100	100	175	141	315
CPSSR_234|CTC	ACTCGAACTCCGACTTGCAG	60.039	20	100	100	CTCCCGCTTGACTTCTTCGA	59.756	20	100	100	190	142	331	ACTCGAACTCCGACTTGCAG	60.039	20	100	100	TCTCCCGCTTGACTTCTTCG	59.756	20	100	100	191	142	332	GACTCGAACTCCGACTTGCA	60.039	20	100	100	CTCCCGCTTGACTTCTTCGA	59.756	20	100	100	191	141	331
CPSSR_235|CTC	GTTGGGCAATTGCTCCTTGG	60.037	20	100	100	AGGAGAAGGAGAGGAAGTGGT	59.565	21	100	100	108	138	245	TGTGCCGAGCATAACGATGT	60.108	20	100	100	AGGAGAAGGAGAGGAAGTGGT	59.565	21	100	100	192	54	245	GTTGGGCAATTGCTCCTTGG	60.037	20	100	100	GGAGAAGGAGAGGAAGTGGTG	59.447	21	100	100	107	138	244
CPSSR_236|CTC	GTTGGGCAATTGCTCCTTGG	60.037	20	100	100	AGGAGAAGGAGAGGAAGTGGT	59.565	21	100	100	108	138	245	TGTGCCGAGCATAACGATGT	60.108	20	100	100	AGGAGAAGGAGAGGAAGTGGT	59.565	21	100	100	192	54	245	GTTGGGCAATTGCTCCTTGG	60.037	20	100	100	GGAGAAGGAGAGGAAGTGGTG	59.447	21	100	100	107	138	244
CPSSR_237|CTC	ACTCGAACTCCGACTTGCAG	60.039	20	100	100	CTCCCGCTTGACTTCTTCGA	59.756	20	100	100	190	142	331	ACTCGAACTCCGACTTGCAG	60.039	20	100	100	TCTCCCGCTTGACTTCTTCG	59.756	20	100	100	191	142	332	GACTCGAACTCCGACTTGCA	60.039	20	100	100	CTCCCGCTTGACTTCTTCGA	59.756	20	100	100	191	141	331
CPSSR_238|CTC	CTCCTCTTCTGCCTTGCACA	59.964	20	100	100	GAACTGATGGTGCAGCAACG	60.11	20	100	80	192	59	250	CTCCTCTTCTGCCTTGCACA	59.964	20	100	100	GGAACTGATGGTGCAGCAAC	59.758	20	100	85	193	59	251	AACGTCAGGCAAGCAGACAT	60.25	20	100	100	GAACACGTTGCAGGACATCG	59.836	20	100	100	153	162	314
CPSSR_239|CTC	CCCGGGCACTACAAGAAAGT	59.964	20	100	100	GATGCCAAACTGCACCCATG	60.109	20	100	100	192	161	352	CCCGGGCACTACAAGAAAGT	59.964	20	100	100	CATTCCGGATGCCAAACTGC	60.179	20	100	100	199	161	359	CCCGGGCACTACAAGAAAGT	59.964	20	100	100	ATTCCGGATGCCAAACTGCA	60.612	20	100	100	198	161	358
CPSSR_240|CTC	CCGTCGTCGTCCATGAAGAT	59.899	20	100	100	TTGGGATGCTTGTGGTGTCA	59.815	20	100	100	175	91	265	GATCTCCGTCGTCGTCCATG	60.317	20	100	100	TTGGGATGCTTGTGGTGTCA	59.815	20	100	100	180	86	265	CAGATCCGGCAGCAGATCTC	60.32	20	100	100	TTGGGATGCTTGTGGTGTCA	59.815	20	100	100	194	72	265
CPSSR_241|CTG	TCATCGTCGCTGCTGGATAC	59.969	20	100	100	GATGATGCAGTCGACGAACG	59.432	20	100	100	101	117	217	CATCGTCGCTGCTGGATACT	59.969	20	100	100	GATGATGCAGTCGACGAACG	59.432	20	100	100	100	118	217	TCATCGTCGCTGCTGGATAC	59.969	20	100	100	ATGATGCAGTCGACGAACGG	60.802	20	100	100	100	117	216
CPSSR_242|CTG	TGGGCTTCTGTCTCTCTGGT	60.179	20	100	100	ACCACCGGAAGTGTAGCAAG	59.965	20	100	100	182	139	320	TGGGCTTCTGTCTCTCTGGT	60.179	20	100	100	ACCGGAAGTGTAGCAAGAGC	60.037	20	100	100	179	139	317	TGGGCTTCTGTCTCTCTGGT	60.179	20	100	100	CCGGAAGTGTAGCAAGAGCA	60.037	20	100	100	178	139	316
CPSSR_243|CTG	CCAGCATCGGTCCTTGATGT	60.108	20	100	100	CGGTAGAAGGGGCAAAGAGG	60.108	20	100	100	141	178	318	CCGTGAACCAACCCAGGATT	60.251	20	100	100	ATCAGTTGCATTGCCGGAGA	60.035	20	100	100	193	72	264	CCGTGAACCAACCCAGGATT	60.251	20	100	100	AGCGACGGAGAACAAGAACA	59.612	20	100	100	174	72	245
CPSSR_244|CTG	CCAGCATCGGTCCTTGATGT	60.108	20	100	100	CGGTAGAAGGGGCAAAGAGG	60.108	20	100	100	141	178	318	CCGTGAACCAACCCAGGATT	60.251	20	100	100	ATCAGTTGCATTGCCGGAGA	60.035	20	100	100	193	72	264	CCGTGAACCAACCCAGGATT	60.251	20	100	100	AGCGACGGAGAACAAGAACA	59.612	20	100	100	174	72	245
CPSSR_245|CTG	GCTGAACCATTGCCAAGAGC	60.109	20	100	100	CTCCATCGATCGGGTTCTGG	59.967	20	100	100	167	136	302	GCTGAACCATTGCCAAGAGC	60.109	20	100	100	TCTTGCCTGCTCCATCGATC	59.894	20	100	100	176	136	311	GCTGAACCATTGCCAAGAGC	60.109	20	100	100	CATCTTGCCTGCTCCATCGA	60.179	20	100	100	178	136	313
CPSSR_246|CTG	TCTACAGCTGACGCTTTGGC	60.671	20	100	100	ACCGCTCGAATCACAACAGT	59.966	20	100	100	110	36	145	CTACAGCTGACGCTTTGGCT	60.672	20	100	100	ACCGCTCGAATCACAACAGT	59.966	20	100	100	109	37	145	GCGAGAAGGACCTGAACAGT	59.681	20	100	100	AGACGGGTACTTCCTCCAGT	59.591	20	100	100	107	66	172
CPSSR_247|CTT	AAAAGCAAGCATGGCAGCAA	59.893	20	100	100	CGTTCAACTGCGACGACAAG	60.112	20	100	100	152	78	229	AAAAGCAAGCATGGCAGCAA	59.893	20	100	100	CAACTGCGACGACAAGAACC	59.768	20	100	100	148	78	225	AAAAGCAAGCATGGCAGCAA	59.893	20	100	100	TGCGACGACAAGAACCCTAG	59.757	20	100	100	144	78	221
CPSSR_248|CTT	GCCTTTGCCAAGAACAGAGC	60.039	20	100	100	TTGACCCACTTCTCCAGCAC	59.891	20	100	80	190	50	239	GCCTTTGCCAAGAACAGAGC	60.039	20	100	100	GCCCATCTCCCATGGATCAC	60.251	20	100	100	136	50	185	GTTGGGACACTGCTGGGTTA	59.89	20	100	90	GCCCATCTCCCATGGATCAC	60.251	20	100	100	171	15	185
CPSSR_249|CTT	TCTGTTGCTGTTGCTGTTGC	59.899	20	100	95	AGAGACCCATCTGTCAGAGACT	59.688	22	95.5	100	101	178	278	CTGTTGCTGTTGCTGTTGCT	59.898	20	100	90	AGAGACCCATCTGTCAGAGACT	59.688	22	95.5	100	100	179	278	TCTGTTGCTGTTGCTGTTGC	59.899	20	100	95	CAGAGACCCATCTGTCAGAGAC	59.573	22	95.2	95.45	102	178	279
CPSSR_250|CTT	GCGATGCCTTTCGTTCATCC	59.972	20	100	100	CCCATCGATTGAGCTCTGCT	59.894	20	100	100	193	85	277	CGATGCCTTTCGTTCATCCG	59.698	20	100	100	CCCATCGATTGAGCTCTGCT	59.894	20	100	100	192	86	277	ACAGACGACGTGAAATCGGT	59.687	20	100	100	CCCATCGATTGAGCTCTGCT	59.894	20	100	100	123	155	277
CPSSR_251|CTT	GGCTTCACTCTCCACTCACC	60.037	20	N/A	N/A	GCGCAGTTGAAGCATTGACA	60.04	20	100	100	193	76	268	GGCTTCACTCTCCACTCACC	60.037	20	N/A	N/A	TTGGCGCAGTTGAAGCATTG	60.319	20	100	100	196	76	271	GGCTTCACTCTCCACTCACC	60.037	20	N/A	N/A	GTTGGCGCAGTTGAAGCATT	60.319	20	100	100	197	76	272
CPSSR_252|CTT	ACCATCGATTCCGCTTGGTT	60.035	20	100	100	GTGGGCTAACGCTTCCTTCT	60.036	20	100	100	178	100	277	ACCATCGATTCCGCTTGGTT	60.035	20	100	100	AGTGGGCTAACGCTTCCTTC	60.036	20	100	100	179	100	278	ACCATCGATTCCGCTTGGTT	60.035	20	100	100	CAGGGTGCGCATTTTAGTGG	59.829	20	100	100	194	100	293
CPSSR_253|CTT	TGGCCGGACCATTCTTATGT	59.084	20	100	100	GCAGCAAAGCCAAGTCCTTC	60.039	20	100	100	173	146	318	TGGCCGGACCATTCTTATGT	59.084	20	100	100	GAAGCAGCAAAGCCAAGTCC	60.039	20	100	100	176	146	321	TGGCCGGACCATTCTTATGT	59.084	20	100	100	CTTGCGAGATGGCGAAAAGG	59.902	20	100	100	141	146	286
CPSSR_254|CTT	GCAGGAGTGGTACTACCTCT	57.853	20	N/A	N/A	CGACTGATCAAAACACAACA	54.49	20	100	100	200	39	238	TGATCACGTTCATCAGGGAT	56.327	20	100	100	TGCACACAATTCTTCAAAAGGG	57.943	22	100	100	181	94	274	ATGATCACGTTCATCAGGGA	56.327	20	100	100	TGCACACAATTCTTCAAAAGGG	57.943	22	100	100	182	93	274
CPSSR_255|CTT	TTCAACACTCTCGGCTCCAC	59.966	20	100	100	ATCACGCGAAGAGTCTGGTG	60.109	20	100	100	139	117	255	CAGCGCATTCAACACTCTCG	59.906	20	100	100	ATCACGCGAAGAGTCTGGTG	60.109	20	100	100	146	110	255	TTCAACACTCTCGGCTCCAC	59.966	20	100	100	GATCACGCGAAGAGTCTGGT	59.829	20	100	100	140	117	256
CPSSR_256|CTT	TGTAACCATCAAGCTGCTCGA	59.725	21	95.2	100	GCTCCGATCGTGAAATCAAGC	60.005	21	100	100	184	64	247	CCCTGTAACCATCAAGCTGCT	60.34	21	100	71.43	GCTCCGATCGTGAAATCAAGC	60.005	21	100	100	187	61	247	ACCATCAAGCTGCTCGATTG	58.623	20	95	100	GCTCCGATCGTGAAATCAAGC	60.005	21	100	100	180	68	247
CPSSR_257|CTT	CTGTTTACGTCCCCGCTCTT	60.038	20	N/A	N/A	GCAGCACAGAAGAAACGCAA	59.971	20	100	90	115	49	163	TGTTTACGTCCCCGCTCTTC	60.038	20	N/A	N/A	GCAGCACAGAAGAAACGCAA	59.971	20	100	90	114	50	163	CTGTTTACGTCCCCGCTCTT	60.038	20	N/A	N/A	AAGTGATCGTGTGAGCAGCA	59.966	20	100	100	129	49	177
CPSSR_258|CTT	TGCGGACCCTCTTCCTTCTA	59.959	20	100	100	AGGATGAGGACGAGGAGGAC	60.106	20	100	100	129	134	262	TGCGGACCCTCTTCCTTCTA	59.959	20	100	100	ACGAGGAGGAGGATGAGGAC	60.106	20	100	100	138	134	271	TGCGGACCCTCTTCCTTCTA	59.959	20	100	100	GAATTCGCAGGAGACGACGA	60.179	20	100	100	169	134	302
CPSSR_259|CTT	GTAGTGGTGTTGCTGCTCCT	59.965	20	100	100	ATTGCAGTGTAGTCGCAGCT	60.037	20	100	100	105	144	248	GTAGTGGTGTTGCTGCTCCT	59.965	20	100	100	GGCTCCCTCCTATTCCTCCA	60.105	20	100	100	135	144	278	GTAGTGGTGTTGCTGCTCCT	59.965	20	100	100	CAGTGTAGTCGCAGCTCCTC	60.179	20	100	100	101	144	244
CPSSR_260|CTT	GCTTCGCTTCTTGTCTGCAG	59.834	20	100	100	AGGTGGACCCCAAGAGTCTT	60.104	20	100	90	182	124	305	TTCTTGTCTGCAGTGCTGGT	59.819	20	100	100	AGGTGGACCCCAAGAGTCTT	60.104	20	100	90	175	131	305	CTGGTGGTCATGGAGATGGG	59.818	20	100	100	AGGTGGACCCCAAGAGTCTT	60.104	20	100	90	160	146	305
CPSSR_261|CTTCT	GGAGAAGCTCTATCCTCTCCCT	59.89	22	95.5	100	CCTGTTCTCTTCCCTGCCAA	59.598	20	100	100	176	172	347	GGAGAAGCTCTATCCTCTCCCT	59.89	22	95.5	100	CTGCGGCTCGGACAAAGTAT	60.46	20	100	100	112	172	283	GGAGAAGCTCTATCCTCTCCCT	59.89	22	95.5	100	ACCTGTTCTCTTCCCTGCCA	60.768	20	100	100	177	172	348
CPSSR_262|GA	GCCTATGTCGCTCTCCTCAC	59.969	20	N/A	N/A	AGCTGTCCAGAGCGTCAAAA	59.893	20	100	100	144	164	307	TATGTCGCTCTCCTCACCCA	60.034	20	95	100	AGCTGTCCAGAGCGTCAAAA	59.893	20	100	100	141	167	307	GCCTATGTCGCTCTCCTCAC	59.969	20	N/A	N/A	GCCGATTGTTCCTCCTCTCC	60.179	20	100	100	108	164	271
CPSSR_263|GA	GCCTTGGCCTCATTGGAGAT	60.106	20	100	100	CGAACAGTTGTCCGCACAAA	59.625	20	100	100	161	107	267	AAAGAAAGGCCTTGGCCTCA	59.812	20	100	100	CGAACAGTTGTCCGCACAAA	59.625	20	100	100	169	99	267	GCCTTGGCCTCATTGGAGAT	60.106	20	100	100	TCGAACAGTTGTCCGCACAA	60.46	20	100	100	162	107	268
CPSSR_264|GA	GGAAAACGCAAAGGCATCGT	60.04	20	100	100	TCTGAATTCGGCGGTTCCAT	59.748	20	100	100	185	88	272	GGAAAACGCAAAGGCATCGT	60.04	20	100	100	ATCTGAATTCGGCGGTTCCA	59.748	20	100	100	186	88	273	CCAGACGCACAGAACCAGAA	60.25	20	100	100	GTGGGAGATGGTGGAGAAGC	60.107	20	100	95	199	123	321
CPSSR_265|GA	GGCAAACCCGATCACCAAAC	60.039	20	100	100	TCCGCCATTATCGCCACTAC	59.967	20	100	100	150	122	271	GGCAAACCCGATCACCAAAC	60.039	20	100	100	CCGCCATTATCGCCACTACT	59.966	20	100	100	149	122	270	AGGCAAACCCGATCACCAAA	60.179	20	100	100	TCCGCCATTATCGCCACTAC	59.967	20	100	100	151	121	271
CPSSR_266|GA	TGTGTGTGTCTCTGCATCTGT	59.586	21	94.7	90.48	GCAGCGCAGTTTTATCAGCA	59.831	20	N/A	N/A	169	179	347	GTGTGTGTCTCTGCATCTGTG	59.203	21	95	95.24	GCAGCGCAGTTTTATCAGCA	59.831	20	N/A	N/A	168	180	347	ATGTGTGTGTCTCTGCATCTGT	59.962	22	94.7	86.36	GCAGCGCAGTTTTATCAGCA	59.831	20	N/A	N/A	170	178	347
CPSSR_267|GA	TCTCTCATGAGGGGTCTGCT	59.662	20	100	100	CCCAACCCAAATCCCAACCT	60.179	20	N/A	N/A	190	108	297	CGCTCTCGGTTCCCAGATTT	60.108	20	100	100	CTCCACGATTCCCACTTCGA	59.469	20	100	100	194	80	273	CGCTCTCGGTTCCCAGATTT	60.108	20	100	100	TCTCCACGATTCCCACTTCG	59.469	20	100	100	195	80	274
CPSSR_268|GA	CTTGCGGTGAGAGCACAAAC	60.041	20	100	100	GCCGCACTCTCTCTCTCAAA	59.755	20	100	70	197	66	262	CGAGGCTAGAGTGAAAGCGT	59.829	20	100	100	GCCGCACTCTCTCTCTCAAA	59.755	20	100	70	150	113	262	TCGAGGCTAGAGTGAAAGCG	59.548	20	100	100	GCCGCACTCTCTCTCTCAAA	59.755	20	100	70	151	112	262
CPSSR_269|GA	GGAAAACGCAAAGGCATCGT	60.04	20	100	100	TCTGAATTCGGCGGTTCCAT	59.748	20	100	100	185	88	272	GGAAAACGCAAAGGCATCGT	60.04	20	100	100	ATCTGAATTCGGCGGTTCCA	59.748	20	100	100	186	88	273	CCAGACGCACAGAACCAGAA	60.25	20	100	100	GTGGGAGATGGTGGAGAAGC	60.107	20	100	95	199	123	321
CPSSR_270|GA	CAAGAAGAGGCACCGGGATT	60.035	20	100	100	GGCCTCCCAAGAACCAACAT	60.252	20	100	95	190	89	278	CAAGAAGAGGCACCGGGATT	60.035	20	100	100	GCCTCCCAAGAACCAACATG	59.109	20	100	100	189	89	277	CAAGAAGAGGCACCGGGATT	60.035	20	100	100	CCTCCCAAGAACCAACATGGA	59.925	21	100	100	188	89	276
CPSSR_271|GA	ACTGTGCCAGCAACTCATGA	59.891	20	100	100	CCTGCAATTCTGGATCCACCT	60.064	21	100	100	152	124	275	CACTGTGCCAGCAACTCATG	59.76	20	100	100	CCTGCAATTCTGGATCCACCT	60.064	21	100	100	153	123	275	AGAGCCATCCATGTCCTTGG	59.45	20	100	100	CCTGCAATTCTGGATCCACCT	60.064	21	100	100	108	168	275
CPSSR_272|GA	CGAGGGTCTCCGTTATTTGTG	58.732	21	95.2	100	ACCCAGAAGCAAGAGTGGAA	58.86	20	100	90	200	91	290	CAGGTAAAGCGAGGGTCTCC	59.824	20	100	100	GGTGACAGAGACAGATCAAACCA	60.244	23	100	100	183	82	264	CAGGTAAAGCGAGGGTCTCC	59.824	20	100	100	TGGTGACAGAGACAGATCAAACC	60.244	23	100	100	184	82	265
CPSSR_273|GA	TTGGTGGCGATGATGGTCTC	60.108	20	100	100	GGGCAAGAAGGTTGAAGACG	59.125	20	N/A	N/A	170	147	316	TTTCTGGTTGGTGGCGATGA	59.89	20	100	100	GGGCAAGAAGGTTGAAGACG	59.125	20	N/A	N/A	177	140	316	GATTCGCAGCAACCCATGAC	59.901	20	100	100	TCCCTCTCTCCTCTCTCCTCT	59.989	21	100	100	175	80	254
CPSSR_274|GA	TTGGTGGCGATGATGGTCTC	60.108	20	100	100	GGGCAAGAAGGTTGAAGACG	59.125	20	N/A	N/A	170	147	316	TTTCTGGTTGGTGGCGATGA	59.89	20	100	100	GGGCAAGAAGGTTGAAGACG	59.125	20	N/A	N/A	177	140	316	GATTCGCAGCAACCCATGAC	59.901	20	100	100	TCCCTCTCTCCTCTCTCCTCT	59.989	21	100	100	175	80	254
CPSSR_275|GA	AGCTGAAGACATTGTGTGGGT	59.856	21	100	100	ATGGCCTCCGTGTAAGCATC	60.179	20	100	100	168	129	296	CCCCAGCTGAAGACATTGTG	58.829	20	100	100	ATGGCCTCCGTGTAAGCATC	60.179	20	100	100	172	125	296	AGCTGAAGACATTGTGTGGGT	59.856	21	100	100	GAGTGTAATGGCCTCCGTGT	59.751	20	100	100	175	129	303
CPSSR_276|GA	CTCGCTCTTCGCTTCTCTCC	60.248	20	100	100	CGTTCCTCCATGATCGCAGA	59.897	20	100	100	170	43	212	CCTCGCTCTTCGCTTCTCTC	60.248	20	100	100	CGTTCCTCCATGATCGCAGA	59.897	20	100	100	171	42	212	TCTTCGCTTCTCTCCCACCT	60.252	20	100	100	CGTTCCTCCATGATCGCAGA	59.897	20	100	100	165	48	212
CPSSR_277|GA	CTCGCTCTTCGCTTCTCTCC	60.248	20	100	100	CGTTCCTCCATGATCGCAGA	59.897	20	100	100	170	43	212	CCTCGCTCTTCGCTTCTCTC	60.248	20	100	100	CGTTCCTCCATGATCGCAGA	59.897	20	100	100	171	42	212	TCTTCGCTTCTCTCCCACCT	60.252	20	100	100	CGTTCCTCCATGATCGCAGA	59.897	20	100	100	165	48	212
CPSSR_278|GA	AGCAAGACAATGGGGAGCAA	59.887	20	100	100	GCATTGCTCCTTTCTGAAATCCC	60.43	23	95.7	100	144	106	249	AGCAAGACAATGGGGAGCAA	59.887	20	100	100	AGCATTGCTCCTTTCTGAAATCC	59.553	23	95.7	100	145	106	250	AGCAAGACAATGGGGAGCAA	59.887	20	100	100	TGTAGCATTGCTCCTTTCTGA	57.299	21	100	90.48	148	106	253
CPSSR_279|GA	TTCAACTGCCCCGTCTCTTC	59.965	20	100	100	AAGCCGACATTCGTTCTGGT	59.965	20	100	100	186	77	262	TCTTCCATCGCCCAAAAGCT	59.962	20	100	100	AAGCCGACATTCGTTCTGGT	59.965	20	100	100	171	92	262	GAAAGAGAGGAGCCGCCATT	60.107	20	100	100	AAGCCGACATTCGTTCTGGT	59.965	20	100	100	109	154	262
CPSSR_280|GA	TGCAGAGGGTTTCAGCTTCA	59.526	20	100	100	AGTGCGTACCATGGTCTTGG	60.036	20	100	100	137	163	299	TGGGAAAGGCCACAAACTGT	60.033	20	100	100	TGTGGTGTGTTTGCAAAGCA	59.395	20	100	100	167	72	238	CCTGATGGGAAAGGCCACAA	60.252	20	100	100	TGTGGTGTGTTTGCAAAGCA	59.395	20	100	100	172	67	238
CPSSR_281|GA	CAGAGCAGGAGAGTGTTGGG	60.037	20	100	100	CACTACCGCACCATTTCCCA	60.322	20	100	100	196	110	305	CAGAGCAGGAGAGTGTTGGG	60.037	20	100	100	ACCACTACCGCACCATTTCC	60.322	20	100	100	198	110	307	GGGGAGCTCTCTGCATGTAG	59.608	20	95	100	CTTCACCACTACCGCACCAT	60.036	20	100	100	172	140	311
CPSSR_282|GA	GCCAAAGCGCGCTTGATATT	60.249	20	100	100	GTGTCTCCGAACTGAGATGCT	59.796	21	100	100	162	93	254	GCCAAAGCGCGCTTGATATT	60.249	20	100	100	AGTGTCTCCGAACTGAGATGC	59.796	21	100	100	163	93	255	GCCAAAGCGCGCTTGATATT	60.249	20	100	100	TGTCTCCGAACTGAGATGCT	58.45	20	100	100	161	93	253
CPSSR_283|GA	GCGCCCTTGCTTTGTTAGAT	59.189	20	N/A	N/A	GCAGATGGCTTAGCATGGAC	59.05	20	100	100	188	2	189	GCGCCCTTGCTTTGTTAGATC	60.202	21	N/A	N/A	GCAGATGGCTTAGCATGGAC	59.05	20	100	100	188	2	189	GGCGCCCTTGCTTTGTTAG	59.787	19	N/A	N/A	GCAGATGGCTTAGCATGGAC	59.05	20	100	100	189	1	189
CPSSR_284|GAA	ACCCAAACCAAAACATAGCCA	58.316	21	100	90.48	CTACAGCAGGCACTCCACAA	59.965	20	95	100	190	127	316	ACCCAAACCAAAACATAGCCA	58.316	21	100	90.48	CAGCAGGCACTCCACAAAAG	59.687	20	100	80	187	127	313	ACCCAAACCAAAACATAGCCA	58.316	21	100	90.48	TCTCGTCCCTTCTCTCTGCT	59.67	20	100	100	164	127	290
CPSSR_285|GAA	ACCCAAACCAAAACATAGCCA	58.316	21	100	90.48	CTACAGCAGGCACTCCACAA	59.965	20	95	100	187	127	313	ACCCAAACCAAAACATAGCCA	58.316	21	100	90.48	CAGCAGGCACTCCACAAAAG	59.687	20	100	80	184	127	310	ACCCAAACCAAAACATAGCCA	58.316	21	100	90.48	TCTCGTCCCTTCTCTCTGCT	59.67	20	100	100	161	127	287
CPSSR_286|GAA	AAGGTTCTGCGGCGTAGAAG	60.39	20	100	100	GCTCAAGTCCAGCAAATGCC	60.109	20	100	100	108	139	246	TCAACCCGAAAGCTCTTCGT	59.608	20	94.1	85	GCTCAAGTCCAGCAAATGCC	60.109	20	100	100	197	50	246	AAGGTTCTGCGGCGTAGAAG	60.39	20	100	100	GAGGAATCGGCTGTTGTTGC	59.831	20	N/A	N/A	132	139	270
CPSSR_287|GAA	CGAGAGAAACGCGTTGCAAA	60.043	20	100	100	CGTGTTGTGTCTCTCGACCA	59.97	20	100	100	145	107	251	CGAGAGAAACGCGTTGCAAA	60.043	20	100	100	TCAGGCGTGTTGTGTCTCTC	59.968	20	100	100	150	107	256	ATGATAAGCTCGCTGTCGCA	59.897	20	100	100	CGTGTTGTGTCTCTCGACCA	59.97	20	100	100	120	132	251
CPSSR_288|GAA	CGATCCACCTGTTCGTGTGA	60.039	20	100	100	ACCTCTGCTTCAGCTTCAACT	59.581	21	100	100	183	54	236	TCGATCCACCTGTTCGTGTG	60.039	20	100	100	ACCTCTGCTTCAGCTTCAACT	59.581	21	100	100	184	53	236	CGATCCACCTGTTCGTGTGA	60.039	20	100	100	ACCTCTGCTTCAGCTTCAAC	58.11	20	100	100	183	54	236
CPSSR_289|GAA	AGACGAGCCCAGATCACTCT	60.034	20	95	100	CTGCAGAAGGGTCCTGGTTT	59.889	20	100	100	197	96	292	AGCTACTGCGGGGTAGTAGT	59.742	20	100	100	CTGCAGAAGGGTCCTGGTTT	59.889	20	100	100	155	138	292	GAGACGAGCCCAGATCACTC	59.616	20	95	100	CTGCAGAAGGGTCCTGGTTT	59.889	20	100	100	198	95	292
CPSSR_290|GAA	ATGCTGGAGATGCGGGAAAT	59.816	20	94.4	90	TGCCTCAACACAGTACCATCC	59.997	21	100	100	169	145	313	ATGCTGGAGATGCGGGAAAT	59.816	20	94.4	90	GCCTCAACACAGTACCATCCT	59.721	21	100	100	168	145	312	GATGCTGGAGATGCGGGAAA	60.464	20	94.7	95	TGCCTCAACACAGTACCATCC	59.997	21	100	100	170	144	313
CPSSR_291|GAA	GCCCTTGGATCTTGACTGAGT	59.72	21	100	100	TGCTGGTCATCATTTGCAACA	59.038	21	100	100	153	118	270	ATGTGTGGGCAGTTCGTCTT	59.891	20	100	100	ACATATAGCCACTCCAACCAGA	58.616	22	100	100	178	60	237	AAGATGTGTGGGCAGTTCGT	59.891	20	100	100	ACATATAGCCACTCCAACCAGA	58.616	22	100	100	181	57	237
CPSSR_292|GAA	CCAAGAGACCGAGCTGTGTT	59.966	20	100	100	AGGTCCAAAACATGCCCAGT	59.812	20	100	100	188	87	274	TTCCAAGAGACCGAGCTGTG	59.682	20	100	100	AGGTCCAAAACATGCCCAGT	59.812	20	100	100	190	85	274	TGTTCCAAGAGACCGAGCTG	59.682	20	100	100	AGGTCCAAAACATGCCCAGT	59.812	20	100	100	192	83	274
CPSSR_293|GAA	TGGCTCTCTCTTCCTCTTCCA	59.922	21	100	100	GGGAGGGGCTTTGTTGATCT	59.667	20	100	90	127	110	236	TGGCTCTCTCTTCCTCTTCCA	59.922	21	100	100	CGAGCTCCGACAAATCCTCT	59.542	20	100	100	163	110	272	TGGCTCTCTCTTCCTCTTCCA	59.922	21	100	100	CCGAGCTCCGACAAATCCTC	60.529	20	100	100	164	110	273
CPSSR_294|GAA	TGGCTCTCTCTTCCTCTTCCA	59.922	21	100	100	GGGAGGGGCTTTGTTGATCT	59.667	20	100	90	127	110	236	TGGCTCTCTCTTCCTCTTCCA	59.922	21	100	100	CGAGCTCCGACAAATCCTCT	59.542	20	100	100	163	110	272	TGGCTCTCTCTTCCTCTTCCA	59.922	21	100	100	CCGAGCTCCGACAAATCCTC	60.529	20	100	100	164	110	273
CPSSR_295|GAA	CGATCCACCTGTTCGTGTGA	60.039	20	100	100	ACCTCTGCTTCAGCTTCAACT	59.581	21	100	100	183	54	236	TCGATCCACCTGTTCGTGTG	60.039	20	100	100	ACCTCTGCTTCAGCTTCAACT	59.581	21	100	100	184	53	236	CGATCCACCTGTTCGTGTGA	60.039	20	100	100	ACCTCTGCTTCAGCTTCAAC	58.11	20	100	100	183	54	236
CPSSR_296|GAA	CCTTGTAGCTTCACGTGGCT	60.321	20	100	100	CTTGGCCCTCGATTCTCTCC	59.894	20	100	100	163	91	253	CCTTGTAGCTTCACGTGGCT	60.321	20	100	100	CCTTGGCCCTCGATTCTCTC	59.894	20	100	100	164	91	254	CCTGCCTTGTAGCTTCACGT	60.321	20	100	100	CTTGGCCCTCGATTCTCTCC	59.894	20	100	100	167	87	253
CPSSR_297|GAA	CTCACTTGAGGAGGAGATGGA	58.255	21	100	100	GCCTCCAGCTTTGCTAGGAA	60.035	20	100	100	160	75	234	TCACTTGAGGAGGAGATGGA	57.072	20	100	100	GCCTCCAGCTTTGCTAGGAA	60.035	20	100	100	159	76	234	CTCACTTGAGGAGGAGATGGA	58.255	21	100	100	TGTGCCTCCAGCTTTGCTAG	60.322	20	100	100	163	75	237
CPSSR_298|GAA	CTCACTTGAGGAGGAGATGGA	58.255	21	100	100	GCCTCCAGCTTTGCTAGGAA	60.035	20	100	100	160	75	234	TCACTTGAGGAGGAGATGGA	57.072	20	100	100	GCCTCCAGCTTTGCTAGGAA	60.035	20	100	100	159	76	234	CTCACTTGAGGAGGAGATGGA	58.255	21	100	100	TGTGCCTCCAGCTTTGCTAG	60.322	20	100	100	163	75	237
CPSSR_299|GAA	CTCACTTGAGGAGGAGATGGA	58.255	21	100	100	GCCTCCAGCTTTGCTAGGAA	60.035	20	100	100	160	75	234	TCACTTGAGGAGGAGATGGA	57.072	20	100	100	GCCTCCAGCTTTGCTAGGAA	60.035	20	100	100	159	76	234	CTCACTTGAGGAGGAGATGGA	58.255	21	100	100	TGTGCCTCCAGCTTTGCTAG	60.322	20	100	100	163	75	237
CPSSR_300|GAA	AGCTCGAGAATCAGCAGCTC	59.897	20	100	100	CGCATTCTCAAAACGCTTGC	59.295	20	100	100	168	158	325	GAGAATCAGCAGCTCAAGCG	59.348	20	100	100	CACAAACACACACAGCGCTT	60.179	20	100	90	197	163	359	CGAGAATCAGCAGCTCAAGC	59.348	20	100	100	CACAAACACACACAGCGCTT	60.179	20	100	90	198	162	359
CPSSR_301|GAA	AGCTCGAGAATCAGCAGCTC	59.897	20	100	100	CGCATTCTCAAAACGCTTGC	59.295	20	100	100	168	158	325	GAGAATCAGCAGCTCAAGCG	59.348	20	100	100	CACAAACACACACAGCGCTT	60.179	20	100	90	197	163	359	CGAGAATCAGCAGCTCAAGC	59.348	20	100	100	CACAAACACACACAGCGCTT	60.179	20	100	90	198	162	359
CPSSR_302|GAA	AACCAGAGGAGCACCAGAAG	59.31	20	100	100	CGCCTCCAGAGAATGCAATC	59.057	20	100	100	142	124	265	AACCAGAGGAGCACCAGAAG	59.31	20	100	100	GCGCCTCCAGAGAATGCAAT	61.1	20	100	100	143	124	266	GCAAGAAAGGAAGGGTGGAGA	59.926	21	100	100	CGCCTCCAGAGAATGCAATC	59.057	20	100	100	103	163	265
CPSSR_303|GAA	CTCCAGCGAGGACGAAAGAA	59.756	20	100	65	CGCTCGTCTTCGTTCTCACT	60.11	20	100	100	174	165	338	GAAGACGATCACTCCAGCGA	59.548	20	100	40	CGCTCGTCTTCGTTCTCACT	60.11	20	100	100	185	154	338	TCCAGCGAGGACGAAAGAAA	59.323	20	94.4	90	CGCTCGTCTTCGTTCTCACT	60.11	20	100	100	173	166	338
CPSSR_304|GAA	CCAATCATGGCTTCTGCACA	58.821	20	100	100	ACTCTAGAAACACAACCTAGCA	56.776	22	95.5	100	193	138	330	CCAATCATGGCTTCTGCACA	58.821	20	100	100	CAACTCTAGAAACACAACCTAGCA	58.702	24	95.8	100	195	138	332	CCAATCATGGCTTCTGCACA	58.821	20	100	100	ACAACTCTAGAAACACAACCTAGC	58.702	24	95.8	100	196	138	333
CPSSR_305|GAA	TCCGCCTCTTGGATTGACAC	60.036	20	100	100	TCCATCCCTACGTTCGGCTA	60.107	20	100	100	182	155	336	TCCGCCTCTTGGATTGACAC	60.036	20	100	100	TGAAAGGGCGCAAGGAAGAA	60.179	20	100	100	112	155	266	TCCGCCTCTTGGATTGACAC	60.036	20	100	100	CCGAGATGGCTTTGGGTGAA	60.322	20	100	85	128	155	282
CPSSR_306|GAA	TCCGCCTCTTGGATTGACAC	60.036	20	100	100	TCCATCCCTACGTTCGGCTA	60.107	20	100	100	182	155	336	TCCGCCTCTTGGATTGACAC	60.036	20	100	100	TGAAAGGGCGCAAGGAAGAA	60.179	20	100	100	112	155	266	TCCGCCTCTTGGATTGACAC	60.036	20	100	100	CCGAGATGGCTTTGGGTGAA	60.322	20	100	85	128	155	282
CPSSR_307|GAC	GGGAAGCTTCAAGAGGTGCT	59.963	20	100	100	CCCGAGGTTGGGTCTTCTTT	59.599	20	100	100	153	105	257	ACGCAAGAGGGAAGCTTCAA	59.891	20	100	100	CCCGAGGTTGGGTCTTCTTT	59.599	20	100	100	161	97	257	GAGAGGACGCAAGAGGGAAG	59.825	20	100	100	CCCGAGGTTGGGTCTTCTTT	59.599	20	100	100	167	91	257
CPSSR_308|GAG	TGAAAGTGCAGAGCAACGGA	60.179	20	100	100	AACTTCGGCAACCAAACTGC	59.898	20	100	100	193	68	260	GTGCGATGAAAGTGCAGAGC	60.179	20	100	100	AACTTCGGCAACCAAACTGC	59.898	20	100	100	199	62	260	GTGGTGCGATGAAAGTGCAG	60.11	20	100	100	CAACCAAACTGCCATCGCTT	59.685	20	100	100	194	59	252
CPSSR_309|GAG	TGAAAGTGCAGAGCAACGGA	60.179	20	100	100	AACTTCGGCAACCAAACTGC	59.898	20	100	100	193	68	260	GTGCGATGAAAGTGCAGAGC	60.179	20	100	100	AACTTCGGCAACCAAACTGC	59.898	20	100	100	199	62	260	GTGGTGCGATGAAAGTGCAG	60.11	20	100	100	CAACCAAACTGCCATCGCTT	59.685	20	100	100	194	59	252
CPSSR_310|GAG	TGAAAGTGCAGAGCAACGGA	60.179	20	100	100	AACTTCGGCAACCAAACTGC	59.898	20	100	100	193	68	260	GTGCGATGAAAGTGCAGAGC	60.179	20	100	100	AACTTCGGCAACCAAACTGC	59.898	20	100	100	199	62	260	GTGGTGCGATGAAAGTGCAG	60.11	20	100	100	CAACCAAACTGCCATCGCTT	59.685	20	100	100	194	59	252
CPSSR_311|GAG	CGGTGCTTCCACTGTCAGAT	60.037	20	N/A	N/A	GAGCTCGATGTGCAAATGACC	59.937	21	95.2	100	171	67	237	CGGTGCTTCCACTGTCAGAT	60.037	20	N/A	N/A	AGCTCGATGTGCAAATGACC	58.91	20	100	80	170	67	236	TGCTTCCACTGTCAGATGGG	59.674	20	N/A	N/A	GAGCTCGATGTGCAAATGACC	59.937	21	95.2	100	168	70	237
CPSSR_312|GAT	GTGACCGCTGTATGGTGGAA	60.037	20	100	100	GCCCATTCTCTGACCCTTCC	60.107	20	100	100	111	162	272	GTGACCGCTGTATGGTGGAA	60.037	20	100	100	GCTCCATGCCCATTCTCTGA	59.818	20	100	100	118	162	279	GTGACCGCTGTATGGTGGAA	60.037	20	100	100	AGCTCCATGCCCATTCTCTG	59.817	20	100	100	119	162	280
CPSSR_313|GAT	ACGGATCCTTCACAGCAAGG	60.036	20	100	100	AGCATTTTCCAATGGATCGTGA	58.645	22	100	95.45	137	153	289	GGACGGATCCTTCACAGCAA	60.036	20	100	100	AGCATTTTCCAATGGATCGTGA	58.645	22	100	95.45	139	151	289	ACGGATCCTTCACAGCAAGG	60.036	20	100	100	GCATTTTCCAATGGATCGTGA	57.219	21	100	95.24	136	153	288
CPSSR_314|GAT	GTTCCAAATTGGGCCTCTGC	59.753	20	100	100	CCACTGAGCCTCTCTCTTGC	60.108	20	100	100	134	179	312	GTTCCAAATTGGGCCTCTGC	59.753	20	100	100	ACACCACTGAGCCTCTCTCT	59.886	20	100	100	137	179	315	GTTCCAAATTGGGCCTCTGC	59.753	20	100	100	CGTACACCACTGAGCCTCTC	59.829	20	100	100	140	179	318
CPSSR_315|GAT	GTTCCAAATTGGGCCTCTGC	59.753	20	100	100	CCACTGAGCCTCTCTCTTGC	60.108	20	100	100	134	179	312	GTTCCAAATTGGGCCTCTGC	59.753	20	100	100	ACACCACTGAGCCTCTCTCT	59.886	20	100	100	137	179	315	GTTCCAAATTGGGCCTCTGC	59.753	20	100	100	CGTACACCACTGAGCCTCTC	59.829	20	100	100	140	179	318
CPSSR_316|GAT	GTTCCAAATTGGGCCTCTGC	59.753	20	100	100	CCACTGAGCCTCTCTCTTGC	60.108	20	100	100	134	179	312	GTTCCAAATTGGGCCTCTGC	59.753	20	100	100	ACACCACTGAGCCTCTCTCT	59.886	20	100	100	137	179	315	GTTCCAAATTGGGCCTCTGC	59.753	20	100	100	CGTACACCACTGAGCCTCTC	59.829	20	100	100	140	179	318
CPSSR_317|GAT	TGTACCGGTAGTAGCCCAGT	59.667	20	100	100	AATCGGTCCTAGAGCTGCTG	59.25	20	100	100	148	170	317	GCCCTTGGCCTCCAATATCC	60.541	20	100	100	AATCGGTCCTAGAGCTGCTG	59.25	20	100	100	194	124	317	ACCGGTAGTAGCCCAGTAGT	59.372	20	100	100	AATCGGTCCTAGAGCTGCTG	59.25	20	100	100	145	173	317
CPSSR_318|GAT	ACCCGATGCTGAAGAGGATG	59.533	20	100	80	GGCTCCTTGTGCTCCTCATT	60.035	20	100	100	156	154	309	CACCCGATGCTGAAGAGGAT	59.533	20	95	100	GGCTCCTTGTGCTCCTCATT	60.035	20	100	100	157	153	309	ACCCGATGCTGAAGAGGATG	59.533	20	100	80	AAAGGCTCCTTGTGCTCCTC	59.963	20	100	100	159	154	312
CPSSR_319|GAT	TTCAAAGGGCCCCGAAATGA	59.887	20	100	100	ACTTCTCCTGTTCAGTGCCA	58.868	20	N/A	N/A	194	145	338	GCCCCGAAATGAGGAGAGAC	60.179	20	100	100	ACTTCTCCTGTTCAGTGCCA	58.868	20	N/A	N/A	186	153	338	TCAAAGGGCCCCGAAATGAG	60.323	20	100	100	ACTTCTCCTGTTCAGTGCCA	58.868	20	N/A	N/A	193	146	338
CPSSR_320|GAT	TCTGATGATGAGGGCATGCT	58.862	20	100	100	TCTGCAGGTCTCTTCTTGCC	59.677	20	100	100	131	152	282	TGATGATGAGGGCATGCTTGA	59.787	21	100	100	TCTGCAGGTCTCTTCTTGCC	59.677	20	100	100	129	154	282	TCTGATGATGAGGGCATGCT	58.862	20	100	100	GGCTCAGCCTTCTTAGGTGT	59.384	20	100	95	110	152	261
CPSSR_321|GAT	TGGAAGTAGAAGGCGAGGGA	59.959	20	100	100	CCTGTACTCTCACCCTTGCC	59.749	20	100	100	187	67	253	GCGAGGGAGGGATGAAGAAG	59.894	20	100	100	CCTGTACTCTCACCCTTGCC	59.749	20	100	100	175	79	253	TGGAAGTAGAAGGCGAGGGA	59.959	20	100	100	TCTCACCCTTGCCTCCTTTG	59.598	20	100	100	180	67	246
CPSSR_322|GCA	GCAGCAGCAACAGCTTCATC	60.456	20	100	100	CGCTCGACCAACTGTTCAAC	59.768	20	100	100	105	167	271	CAGCAGCAACAGCTTCATCA	59.121	20	100	100	CGCTCGACCAACTGTTCAAC	59.768	20	100	100	104	168	271	GCAGCAGCAACAGCTTCATC	60.456	20	100	100	TGGGAATGTTGTTGCAGCTG	59.325	20	95	100	192	167	358
CPSSR_323|GCA	GCAGCAGCAACAGCTTCATC	60.456	20	100	100	CGCTCGACCAACTGTTCAAC	59.768	20	100	100	105	167	271	CAGCAGCAACAGCTTCATCA	59.121	20	100	100	CGCTCGACCAACTGTTCAAC	59.768	20	100	100	104	168	271	GCAGCAGCAACAGCTTCATC	60.456	20	100	100	TGGGAATGTTGTTGCAGCTG	59.325	20	95	100	192	167	358
CPSSR_324|GCA	ACGACAGTTTGAGCTCAGACA	59.591	21	100	95.24	ATGAACCTGCTGCTGGTGAA	59.889	20	100	100	145	170	314	ACGACAGTTTGAGCTCAGACA	59.591	21	100	95.24	ATCATGAACCTGCTGCTGGT	59.669	20	100	100	148	170	317	ACGACAGTTTGAGCTCAGACA	59.591	21	100	95.24	TGAACCTGCTGCTGGTGAAG	60.536	20	100	100	144	170	313
CPSSR_325|GCA	ACGACAGTTTGAGCTCAGACA	59.591	21	100	95.24	ATGAACCTGCTGCTGGTGAA	59.889	20	100	100	145	170	314	ACGACAGTTTGAGCTCAGACA	59.591	21	100	95.24	ATCATGAACCTGCTGCTGGT	59.669	20	100	100	148	170	317	ACGACAGTTTGAGCTCAGACA	59.591	21	100	95.24	TGAACCTGCTGCTGGTGAAG	60.536	20	100	100	144	170	313
CPSSR_326|GCC	TTCAGCTCCCCAAGAACTGC	60.251	20	100	100	TGCGCCATTGCCATCTCTTA	60.107	20	95	100	134	118	251	GCTCTTCAGCTCCCCAAGAA	59.674	20	100	100	TGCGCCATTGCCATCTCTTA	60.107	20	95	100	138	114	251	TTCAGCTCCCCAAGAACTGC	60.251	20	100	100	GCGCCATTGCCATCTCTTAC	59.691	20	95	100	133	118	250
CPSSR_327|GCG	GCGGATAGGAACTCCACACG	60.528	20	100	100	GACGTCGAAGTGAACCCACA	60.249	20	100	100	164	137	300	GCAGCGGATAGGAACTCCAC	60.531	20	100	90	GACGTCGAAGTGAACCCACA	60.249	20	100	100	167	134	300	GCGGATAGGAACTCCACACG	60.528	20	100	100	TCGAAGTGAACCCACACGTG	60.529	20	100	100	160	137	296
CPSSR_328|GCG	GCGGATAGGAACTCCACACG	60.528	20	100	100	GACGTCGAAGTGAACCCACA	60.249	20	100	100	164	137	300	GCAGCGGATAGGAACTCCAC	60.531	20	100	90	GACGTCGAAGTGAACCCACA	60.249	20	100	100	167	134	300	GCGGATAGGAACTCCACACG	60.528	20	100	100	TCGAAGTGAACCCACACGTG	60.529	20	100	100	160	137	296
CPSSR_329|GCG	GCGGATAGGAACTCCACACG	60.528	20	100	100	GACGTCGAAGTGAACCCACA	60.249	20	100	100	164	137	300	GCAGCGGATAGGAACTCCAC	60.531	20	100	90	GACGTCGAAGTGAACCCACA	60.249	20	100	100	167	134	300	GCGGATAGGAACTCCACACG	60.528	20	100	100	TCGAAGTGAACCCACACGTG	60.529	20	100	100	160	137	296
CPSSR_330|GCG	GCGGATAGGAACTCCACACG	60.528	20	100	100	GACGTCGAAGTGAACCCACA	60.249	20	100	100	164	137	300	GCAGCGGATAGGAACTCCAC	60.531	20	100	90	GACGTCGAAGTGAACCCACA	60.249	20	100	100	167	134	300	GCGGATAGGAACTCCACACG	60.528	20	100	100	TCGAAGTGAACCCACACGTG	60.529	20	100	100	160	137	296
CPSSR_331|GCT	TGTGCATGAACTGGGCAGAT	59.961	20	100	100	ATCAGCCACCTCCTCCATCT	60.03	20	100	100	108	161	268	TGTGCATGAACTGGGCAGAT	59.961	20	100	100	CCACCCCTACCACCTTTTCC	59.961	20	100	100	184	161	344	GAGCAACACCTGTCAGTGGA	59.893	20	100	100	CTTCATCCCCACTGCCACAT	60.034	20	100	100	198	53	250
CPSSR_332|GCT	GAAAGAGATACGCCCGTGCT	60.179	20	95	100	GCGTCTGTTTCCCCGACAAA	61.162	20	95	100	172	120	291	GAAAGAGATACGCCCGTGCT	60.179	20	95	100	CGTCTGTTTCCCCGACAAAT	58.481	20	95	100	171	120	290	GAAAGAGATACGCCCGTGCT	60.179	20	95	100	GCGTCTGTTTCCCCGACAA	60.596	19	94.7	100	172	120	291
CPSSR_333|GCT	ATGCTCCCCAACACAGTAGC	60.035	20	100	100	ATCGGCGGTGATTACTCGTC	59.97	20	N/A	N/A	185	57	241	ATGCTCCCCAACACAGTAGC	60.035	20	100	100	GATCGGCGGTGATTACTCGT	59.97	20	N/A	N/A	186	57	242	TCTTCCATGCTCCCCAACAC	59.962	20	100	100	ATCGGCGGTGATTACTCGTC	59.97	20	N/A	N/A	191	51	241
CPSSR_334|GCT	ATAGGCTCGACGTGCTTCTG	59.899	20	100	100	CTTCCTCCGCAGAGAATCCC	59.894	20	100	100	166	169	334	CATAGGCTCGACGTGCTTCT	59.899	20	100	100	CTTCCTCCGCAGAGAATCCC	59.894	20	100	100	167	168	334	ATAGGCTCGACGTGCTTCTG	59.899	20	100	100	GCTGGAATGAGCCACTACCA	59.747	20	100	100	120	169	288
CPSSR_335|GCT	TGGGCAGCAGATTTGTGGAA	60.179	20	100	100	TCTTGCCTGCTCCATCGATC	59.894	20	100	100	172	168	339	GGCAGCAGATTTGTGGAACC	59.755	20	100	100	TCTTGCCTGCTCCATCGATC	59.894	20	100	100	170	170	339	GGGCAGCAGATTTGTGGAAC	59.755	20	100	100	TCTTGCCTGCTCCATCGATC	59.894	20	100	100	171	169	339
CPSSR_336|GGA	TCCTCCTCCAGAGAGCAACA	59.885	20	100	100	TTGAACACCCACCCATGCTT	60.106	20	100	100	168	148	315	TCCTCCTCCAGAGAGCAACA	59.885	20	100	100	ATTGAACACCCACCCATGCT	59.885	20	100	100	169	148	316	TCCTCCTCCAGAGAGCAACA	59.885	20	100	100	GCCAAGAGCCTTAACGTCCA	60.321	20	100	100	196	148	343
CPSSR_337|GGA	TCCTCCTCCAGAGAGCAACA	59.885	20	100	100	TTGAACACCCACCCATGCTT	60.106	20	100	100	168	148	315	TCCTCCTCCAGAGAGCAACA	59.885	20	100	100	ATTGAACACCCACCCATGCT	59.885	20	100	100	169	148	316	TCCTCCTCCAGAGAGCAACA	59.885	20	100	100	GCCAAGAGCCTTAACGTCCA	60.321	20	100	100	196	148	343
CPSSR_338|GGA	TCCTCCTCCAGAGAGCAACA	59.885	20	100	100	TTGAACACCCACCCATGCTT	60.106	20	100	100	168	148	315	TCCTCCTCCAGAGAGCAACA	59.885	20	100	100	ATTGAACACCCACCCATGCT	59.885	20	100	100	169	148	316	TCCTCCTCCAGAGAGCAACA	59.885	20	100	100	GCCAAGAGCCTTAACGTCCA	60.321	20	100	100	196	148	343
CPSSR_339|GGA	TGTAGGTGGTGGTGGAGACT	59.81	20	100	95	CCCCTCCACCACCTTACAAG	59.672	20	100	90	116	163	278	AACTGGTGTAGGTGGTGGTG	59.528	20	94.7	95	ACAAGTCTCCACCACCTCCT	60.105	20	100	100	101	157	257	GTGTAGGTGGTGGTGGAGAC	59.679	20	100	90	CCCCTCCACCACCTTACAAG	59.672	20	100	90	117	162	278
CPSSR_340|GGA	AGGTTACGAGGCGGTTGATG	60.108	20	100	100	GGACAAGGAACTCTGTGCCA	59.891	20	100	100	177	115	291	GGTTACGAGGCGGTTGATGA	60.109	20	100	100	GGACAAGGAACTCTGTGCCA	59.891	20	100	100	176	116	291	GAGGTTACGAGGCGGTTGAT	59.825	20	100	100	GGACAAGGAACTCTGTGCCA	59.891	20	100	100	178	114	291
CPSSR_341|GGC	CGATCCCAGAAAGCCGTGAA	60.391	20	100	100	GACCGTAGCTTCCGAGGAAC	60.179	20	100	100	127	177	303	CGATCCCAGAAAGCCGTGAA	60.391	20	100	100	CCGTAGCTTCCGAGGAACAA	59.754	20	100	100	125	177	301	CGATCCCAGAAAGCCGTGAA	60.391	20	100	100	TGCGCTTATCCGTAGCTGAC	60.249	20	95	100	144	177	320
CPSSR_342|GGC	GTATGACGTGGATGCTGGCT	60.179	20	100	100	TCACGTCACCAACCCAACAA	60.035	20	95	100	118	149	266	CGGTGTATGACGTGGATGCT	60.179	20	100	100	TCACGTCACCAACCCAACAA	60.035	20	95	100	122	145	266	CGAGGGATGTTGTGGAGAGG	59.823	20	100	100	CAAACCGCAACTCACTCACG	60.042	20	100	95	110	172	281
CPSSR_343|GGC	AAAAGGGCGGATTTGGAGCT	60.252	20	100	100	CCGCCGGAAAACTTTCACTG	60.04	20	100	100	172	84	255	TAGGGTTTCGGAAGGAGGCT	60.253	20	100	100	CCGCCGGAAAACTTTCACTG	60.04	20	100	100	111	145	255	TAGGGTTTCGGAAGGAGGCT	60.253	20	100	100	AAGCTCGGAAACCCTCGTTT	59.892	20	100	100	154	145	298
CPSSR_344|GGC	AAAAGGGCGGATTTGGAGCT	60.252	20	100	100	CCGCCGGAAAACTTTCACTG	60.04	20	100	100	172	84	255	TAGGGTTTCGGAAGGAGGCT	60.253	20	100	100	CCGCCGGAAAACTTTCACTG	60.04	20	100	100	111	145	255	TAGGGTTTCGGAAGGAGGCT	60.253	20	100	100	AAGCTCGGAAACCCTCGTTT	59.892	20	100	100	154	145	298
CPSSR_345|GGC	AAAAGGGCGGATTTGGAGCT	60.252	20	100	100	CCGCCGGAAAACTTTCACTG	60.04	20	100	100	172	84	255	TAGGGTTTCGGAAGGAGGCT	60.253	20	100	100	CCGCCGGAAAACTTTCACTG	60.04	20	100	100	111	145	255	TAGGGTTTCGGAAGGAGGCT	60.253	20	100	100	AAGCTCGGAAACCCTCGTTT	59.892	20	100	100	154	145	298
CPSSR_346|GGC	GCGTCTGAGTTGCTGAGACT	60.039	20	100	100	TAGAAATTGGCCGCCAGAGG	60.107	20	95	100	189	70	258	CTGCGTCTGAGTTGCTGAGA	60.039	20	100	100	TAGAAATTGGCCGCCAGAGG	60.107	20	95	100	191	68	258	TCTGCGTCTGAGTTGCTGAG	60.039	20	100	100	TAGAAATTGGCCGCCAGAGG	60.107	20	95	100	192	67	258
CPSSR_347|GGC	GGCCGAAGAGGTCTTTGTGA	59.965	20	100	100	CCAAGTTGCGAAACAAGCCA	59.898	20	100	100	111	157	267	GGCCGAAGAGGTCTTTGTGA	59.965	20	100	100	TGAGAGCCTTACACCCCACT	60.179	20	100	100	156	157	312	GGCCGAAGAGGTCTTTGTGA	59.965	20	100	100	TGAAGAGTGCCAAGTTGCGA	60.179	20	100	100	120	157	276
CPSSR_348|GGC	CGGTCTGATCGGTGTAGAGC	59.97	20	94.7	95	CTGGGCCCAGACTAAGAAGC	60.107	20	N/A	N/A	137	145	281	CGGTCTGATCGGTGTAGAGC	59.97	20	94.7	95	GGGCCCAGACTAAGAAGCTC	59.821	20	95	100	135	145	279	CGGTCTGATCGGTGTAGAGC	59.97	20	94.7	95	TCGCCGCCCATCAAAATCTA	59.821	20	100	85	175	145	319
CPSSR_349|GGC	ATTGTGGCTTGTCCTGGTGT	59.814	20	100	100	GGCGAAGTTGTTTGTGCTGT	59.899	20	100	100	200	171	370	TTGTGGCTTGTCCTGGTGTC	60.465	20	100	100	GGCGAAGTTGTTTGTGCTGT	59.899	20	100	100	199	172	370	ATTGTGGCTTGTCCTGGTGT	59.814	20	100	100	TGGATTGGAGCAATGGTGGT	59.591	20	100	100	149	171	319
CPSSR_350|GGC	TTCGGTGGAGACGGAGGTAA	60.251	20	100	70	CAGATCAGACGGCACACTGT	60.038	20	100	100	168	152	319	CGCCTCTTCGTTGAAATGGC	60.179	20	100	100	CACTCGCATCATCTCCACCA	59.824	20	100	80	152	94	245	CGCCTCTTCGTTGAAATGGC	60.179	20	100	100	ACTCGCATCATCTCCACCAC	59.823	20	100	75	151	94	244
CPSSR_351|GGC	GCTTGGACGCTCTCTCTTCA	59.755	20	100	100	CTAGCCTCTATGCGCCACTC	60.039	20	100	100	175	110	284	TGCTTGGACGCTCTCTCTTC	59.755	20	100	100	CTAGCCTCTATGCGCCACTC	60.039	20	100	100	176	109	284	CTGCTTGGACGCTCTCTCTT	59.754	20	100	100	CTAGCCTCTATGCGCCACTC	60.039	20	100	100	177	108	284
CPSSR_352|GGT	GGCTGATGACGTGGTAGAGG	59.897	20	100	100	GTTGAAACCCGCCACTTTCC	59.968	20	100	100	169	167	335	GGCTGATGACGTGGTAGAGG	59.897	20	100	100	CGGAAACCAGGCCTTCTTCT	59.963	20	100	100	191	167	357	GATGAGGCTGATGACGTGGT	59.823	20	100	100	GTTGAAACCCGCCACTTTCC	59.968	20	100	100	174	162	335
CPSSR_353|GGT	CGGCGAATGAGGTAGGGAAA	59.823	20	95	100	TCATCGTCTTCCATGGCGTT	59.751	20	100	100	142	176	317	CGGCGAATGAGGTAGGGAAA	59.823	20	95	100	ACTCTCCGGACTTGCTCTCA	60.251	20	100	100	114	176	289	CGGCGAATGAGGTAGGGAAA	59.823	20	95	100	AAGTCCTTCTTCCCCATGGC	59.667	20	100	100	184	176	359
CPSSR_354|GGT	TTGGGCATTTTCGACATCGG	59.192	20	100	100	TCCTCATCGCCGTTACTTGA	58.821	20	100	100	200	41	240	TGGCTTGAATGTGAGGGTTGA	59.855	21	100	100	AGATCTTCCTCATCGCCGTT	58.885	20	100	100	147	100	246	GGCATTTTCGACATCGGGAA	58.908	20	100	100	TCCTCATCGCCGTTACTTGA	58.821	20	100	100	197	44	240
CPSSR_355|GGT	GGGTTCCAGTCGTACGGAAG	60.109	20	100	100	GGAGCCCTCCGATCATCATC	59.751	20	95	100	113	146	258	GGGTTCCAGTCGTACGGAAG	60.109	20	100	100	TCGCCATTGCCCAGTTATCA	59.746	20	100	100	181	146	326	TTCAACCGTGGGTTCCAGTC	60.179	20	100	100	GGAGCCCTCCGATCATCATC	59.751	20	95	100	122	137	258
CPSSR_356|GGT	ACCACCACCAGACCGTAGTA	59.887	20	100	100	TCGCCGTCTTCGTAATCCAA	59.473	20	100	100	165	143	307	ACCACCACCAGACCGTAGTA	59.887	20	100	100	TTCGCCGTCTTCGTAATCCA	59.473	20	100	100	166	143	308	ACCACCACCAGACCGTAGTA	59.887	20	100	100	GCCGTCTTCGTAATCCAAGC	59.349	20	100	100	163	143	305
CPSSR_357|GGT	CAAGGAAGGAGAGGGACTGC	59.748	20	100	100	TGCATGGCTTCTGCATGGTA	60.034	20	100	100	170	167	336	GCAAGGAAGGAGAGGGACTG	59.748	20	100	100	TGCATGGCTTCTGCATGGTA	60.034	20	100	100	171	166	336	AACTCCCGCCACTTTTCCTC	60.251	20	95	100	TCCACGTCCCCTTCCAAAAC	60.179	20	100	100	160	97	256
CPSSR_358|GGT	CGCACTCCACTCTCTGCATT	60.391	20	100	100	TCCTCATCGGTCTGCTCGTA	60.107	20	100	100	199	102	300	CGCACTCCACTCTCTGCATT	60.391	20	100	100	CATTTACGGCGGCAAATCCC	60.249	20	100	100	156	102	257	CGCACTCCACTCTCTGCATT	60.391	20	100	100	CCATTTACGGCGGCAAATCC	60.249	20	100	100	157	102	258
CPSSR_359|GT	TGCAGTTCATGGAGTCAACCT	59.579	21	100	100	CTCAAGAGCGTCGGATCTCC	59.97	20	100	55	165	78	242	TGCAGTTCATGGAGTCAACCT	59.579	21	100	100	CTCCGTGTCCATCGATCTGG	59.969	20	N/A	N/A	196	78	273	GGCTTCTTCTGCAGTTCATGG	59.528	21	95.2	100	CTCAAGAGCGTCGGATCTCC	59.97	20	100	55	174	69	242
CPSSR_360|GT	TGCAGTTCATGGAGTCAACCT	59.579	21	100	100	CTCAAGAGCGTCGGATCTCC	59.97	20	100	55	165	78	242	TGCAGTTCATGGAGTCAACCT	59.579	21	100	100	CTCCGTGTCCATCGATCTGG	59.969	20	N/A	N/A	196	78	273	GGCTTCTTCTGCAGTTCATGG	59.528	21	95.2	100	CTCAAGAGCGTCGGATCTCC	59.97	20	100	55	174	69	242
CPSSR_361|GT	GGGATTCGTTGGGTTCTTCG	58.916	20	100	100	TCCAACGAACAATCCAAAGT	55.488	20	100	100	198	104	301	GGGATTCGTTGGGTTCTTCG	58.916	20	100	100	CTTCCAACGAACAATCCAAAGT	57.432	22	100	100	200	104	303	GCACAGCTGTTGGTTTCGTT	59.899	20	100	100	CACAATTATTGTAGCCAAGTGAGG	58.116	24	95.8	100	164	79	242
CPSSR_362|GT	TGGGTGTGCATGAGTGGAAA	59.815	20	100	100	TGCACAAATGAGAGCCACCA	60.179	20	100	100	153	109	261	TGGGTGTGCATGAGTGGAAA	59.815	20	100	100	GCACAAATGAGAGCCACCAC	59.758	20	100	100	152	109	260	TGGGTGTGCATGAGTGGAAA	59.815	20	100	100	AGCCACCACTTGTTCTTGGG	60.468	20	100	100	141	109	249
CPSSR_363|GT	GAGGTCCCACTTGAGGAAGC	60.036	20	100	100	ATCTGGGTCTTGTGTCCTGT	58.265	20	100	100	111	171	281	ACCCTGAAGAGGTCCCACTT	60.104	20	100	100	ATCTGGGTCTTGTGTCCTGT	58.265	20	100	100	119	163	281	CCCTGAAGAGGTCCCACTTG	59.674	20	100	100	ATCTGGGTCTTGTGTCCTGT	58.265	20	100	100	118	164	281
CPSSR_364|GTC	CAACAGAAACGGCGACCAAG	60.041	20	100	100	GCAGTTTCGTGTTGCCGATT	60.04	20	95	100	171	66	236	ACACCATCTTCGAGGGCTTG	60.036	20	95	100	GTCAGCGCACTGGGAGTTAT	60.108	20	100	100	120	165	284	ACACCATCTTCGAGGGCTTG	60.036	20	95	100	TCAGCGCACTGGGAGTTATG	60.108	20	100	100	119	165	283
CPSSR_365|GTG	ACGAAGAGAAAACCGTCGCT	59.968	20	100	100	CCCTTAAGCCCTACCCTCCT	60.03	20	95	100	131	127	257	AAGACCAGAAAGCCCAGACG	59.965	20	100	100	CCCTTAAGCCCTACCCTCCT	60.03	20	95	100	178	80	257	AGAAAGCCCAGACGAGAAGC	60.037	20	100	80	CCCTTAAGCCCTACCCTCCT	60.03	20	95	100	172	86	257
CPSSR_366|GTG	GTTTGCCAGCCATGATTGGG	60.108	20	100	100	CACGACGCCATGGAAGAGAT	60.179	20	100	100	122	170	291	GTTTGCCAGCCATGATTGGG	60.108	20	100	100	ATCACGACGCCATGGAAGAG	60.179	20	100	100	124	170	293	CTCTTGGCGTATGTCACCGT	60.109	20	95	100	CACGACGCCATGGAAGAGAT	60.179	20	100	100	140	152	291
CPSSR_367|GTT	AGCCTCGTGATTTCTGTGCT	59.677	20	100	100	ACCGGCCAGACCATTCAATT	59.96	20	100	100	167	130	296	AGCCTCGTGATTTCTGTGCT	59.677	20	100	100	AAATCACCGGCCAGACCATT	59.96	20	100	100	172	130	301	AGCCTCGTGATTTCTGTGCT	59.677	20	100	100	AAAATCACCGGCCAGACCAT	59.96	20	100	100	173	130	302
CPSSR_368|GTT	ACACAGAACAGAGCTGCAGA	59.245	20	100	70	ACTGGGTGGGTTCATTGATGT	59.571	21	100	100	198	144	341	ACAGAGCTGCAGAGAAGAGG	59.103	20	100	100	ACTGGGTGGGTTCATTGATGT	59.571	21	100	100	191	151	341	ACACAGAACAGAGCTGCAGA	59.245	20	100	70	AGACGACTCCTCATTTGTGCT	59.379	21	100	100	122	144	265
CPSSR_369|GTT	TAACCTTTTCTCCGCCGCTT	59.964	20	95	100	CCGTGAGCCTGCAAGAAAAG	59.761	20	100	100	170	103	272	CCCCGTCAGTCGTCATTTCA	60.038	20	100	100	CCGTGAGCCTGCAAGAAAAG	59.761	20	100	100	110	163	272	CCCCGTCAGTCGTCATTTCA	60.038	20	100	100	AGGGCCCAGTGAGTGTGATA	60.253	20	100	100	174	163	336
CPSSR_370|GTT	CAGCCCACTTGGTCAAAGGA	60.179	20	100	100	ATCCCGATGCTATTGCTGGT	59.233	20	100	100	198	91	288	ACAGCCCACTTGGTCAAAGG	60.468	20	100	100	ATCCCGATGCTATTGCTGGT	59.233	20	100	100	199	90	288	CACAGCCCACTTGGTCAAAG	59.33	20	100	100	ATCCCGATGCTATTGCTGGT	59.233	20	100	100	200	89	288
CPSSR_371|GTT	TAACAGCACTTGCCCACCAT	59.888	20	100	100	TTGCCCTTACCTGCACAGAG	59.963	20	100	100	177	112	288	ATAACAGCACTTGCCCACCA	59.888	20	100	100	TTGCCCTTACCTGCACAGAG	59.963	20	100	100	178	111	288	CATCCAGTAGTGGCAGCACT	59.749	20	100	100	TTGCCCTTACCTGCACAGAG	59.963	20	100	100	160	129	288
CPSSR_372|TA	AGACTGAACCAGCGGACAAA	59.532	20	95	100	GCTTTCTTGCTGGAGGGAGT	59.963	20	100	100	187	122	308	TTCAGCAGTTGGGCGGTAAT	59.962	20	N/A	N/A	TGCTGCTGAGGATGGAGTAC	59.173	20	100	100	186	83	268	TTCAGCAGTTGGGCGGTAAT	59.962	20	N/A	N/A	ATTGCTGCTGAGGATGGAGT	59.082	20	100	100	188	83	270
CPSSR_373|TA	TGCTGCTCTTGAACCCAGAG	59.964	20	100	100	TGCGGTTTCAATTGCTGCAA	59.896	20	100	65	199	150	348	TGCTGCTCTTGAACCCAGAG	59.964	20	100	100	ATGCGGTTTCAATTGCTGCA	59.682	20	100	65	200	150	349	GCTGCTCTTGAACCCAGAGA	59.677	20	100	100	TGCGGTTTCAATTGCTGCAA	59.896	20	100	65	198	151	348
CPSSR_374|TA	Primers not available
CPSSR_375|TA	Primers not available
CPSSR_376|TA	TGCCTTCAAGTGACCAAGAGT	59.51	21	94.7	90.48	GGCCATGCCCTCTGTATTGA	59.817	20	N/A	N/A	186	140	325	TTGCCTTCAAGTGACCAAGAGT	60.092	22	95	90.91	GGCCATGCCCTCTGTATTGA	59.817	20	N/A	N/A	187	139	325	GGTTGGAGGAGAGTTGGCAA	59.89	20	100	100	ACCACTCTACCATGCTTAGCA	58.812	21	100	100	195	107	301
CPSSR_377|TA	ACTTCCCAACAACTCTGGCA	59.449	20	100	95	ATGTGGCCATAGGGGTGTTC	59.741	20	100	80	196	46	241	ACTTCCCAACAACTCTGGCA	59.449	20	100	95	GTGGCCATAGGGGTGTTCTG	60.394	20	100	70	194	46	239	TCCCAACAACTCTGGCAAGC	60.823	20	100	100	ATGTGGCCATAGGGGTGTTC	59.741	20	100	80	193	49	241
CPSSR_378|TA	TTCCCATCTCAAAAGCCCAT	57.074	20	100	100	AGAGGTTTGGTTGTGTTCCCT	59.431	21	100	100	146	83	228	GCCCATAAGATCCCACTACAGA	59.027	22	100	100	AGAGGTTTGGTTGTGTTCCCT	59.431	21	100	100	132	97	228	AGCCCATAAGATCCCACTACAG	59.025	22	100	100	AGAGGTTTGGTTGTGTTCCCT	59.431	21	100	100	133	96	228
CPSSR_379|TA	CGGCCATGAAGGGTATTGCT	60.466	20	100	100	TCGGCCTTGAAGAAGAACCT	58.943	20	100	90	195	62	256	AGCGGCCATGAAGGGTATTG	60.466	20	100	100	TCGGCCTTGAAGAAGAACCT	58.943	20	100	90	197	60	256	CAGCGGCCATGAAGGGTATT	60.466	20	100	100	TCGGCCTTGAAGAAGAACCT	58.943	20	100	90	198	59	256
CPSSR_380|TA	CGGCCATGAAGGGTATTGCT	60.466	20	100	100	TCGGCCTTGAAGAAGAACCT	58.943	20	100	90	195	62	256	AGCGGCCATGAAGGGTATTG	60.466	20	100	100	TCGGCCTTGAAGAAGAACCT	58.943	20	100	90	197	60	256	CAGCGGCCATGAAGGGTATT	60.466	20	100	100	TCGGCCTTGAAGAAGAACCT	58.943	20	100	90	198	59	256
CPSSR_381|TA	GAGGAAGTGCCACTTTCCCA	59.89	20	100	100	GGCTCCACAAACAGGTACCA	59.89	20	100	100	182	113	294	TGAGGAAGTGCCACTTTCCC	59.89	20	100	100	GGCTCCACAAACAGGTACCA	59.89	20	100	100	183	112	294	AGTGCCACTTTCCCAACTGT	59.741	20	100	100	GGCTCCACAAACAGGTACCA	59.89	20	100	100	177	118	294
CPSSR_382|TA	GAGGAAGTGCCACTTTCCCA	59.89	20	100	100	GGCTCCACAAACAGGTACCA	59.89	20	100	100	182	113	294	TGAGGAAGTGCCACTTTCCC	59.89	20	100	100	GGCTCCACAAACAGGTACCA	59.89	20	100	100	183	112	294	AGTGCCACTTTCCCAACTGT	59.741	20	100	100	GGCTCCACAAACAGGTACCA	59.89	20	100	100	177	118	294
CPSSR_383|TA	GCCATGAGCACCACCAGAAT	60.682	20	94.4	90	GGGTCAGACTGAGGTCCTGA	60.252	20	100	100	178	124	301	GCCATGAGCACCACCAGAAT	60.682	20	94.4	90	AGGGTCAGACTGAGGTCCTG	60.252	20	100	100	179	124	302	CATGTTCTGCTGGCCATGAG	59.261	20	100	100	GGGTCAGACTGAGGTCCTGA	60.252	20	100	100	190	112	301
CPSSR_384|TA	GCCCGCAGAATTCGTTTCAT	59.548	20	100	100	CTTCGAATCGGAGTGAGCCT	59.542	20	100	100	132	140	271	GCCCGCAGAATTCGTTTCAT	59.548	20	100	100	CGGAGTGAGCCTTAACCGAT	59.54	20	100	100	124	140	263	GCCCGCAGAATTCGTTTCAT	59.548	20	100	100	ATCGGAGTGAGCCTTAACCG	59.54	20	100	100	126	140	265
CPSSR_385|TA	GCCCGCAGAATTCGTTTCAT	59.548	20	100	100	CTTCGAATCGGAGTGAGCCT	59.542	20	100	100	132	140	271	GCCCGCAGAATTCGTTTCAT	59.548	20	100	100	CGGAGTGAGCCTTAACCGAT	59.54	20	100	100	124	140	263	GCCCGCAGAATTCGTTTCAT	59.548	20	100	100	ATCGGAGTGAGCCTTAACCG	59.54	20	100	100	126	140	265
CPSSR_386|TA	TGTTAGAGACGTGCAGATCA	56.316	20	100	100	CACAAGGTGACCAGGCTCAT	59.963	20	100	100	200	47	246	TGTTAGAGACGTGCAGATCAA	57.066	21	100	100	CACAAGGTGACCAGGCTCAT	59.963	20	100	100	200	47	246	TGTTAGAGACGTGCAGATCAAA	57.748	22	100	100	CACAAGGTGACCAGGCTCAT	59.963	20	100	100	200	47	246
CPSSR_387|TA	ACAACAAGCGAATTTCCTGA	55.878	20	100	100	AAGGATGTGATGCCGGAGAC	59.821	20	100	100	148	157	304	ACAACAAGCGAATTTCCTGA	55.878	20	100	100	GCTGATAGGTTCTGCGCTGA	60.179	20	N/A	N/A	178	157	334	ACAACAAGCGAATTTCCTGA	55.878	20	100	100	GGGTGGGCTGATAGGTTCTG	59.819	20	N/A	N/A	184	157	340
CPSSR_388|TAA	GCCCTGAAAACGAAAAGCAGA	59.663	21	100	95.24	TCCACGGAGACAACTTTGGA	58.875	20	100	100	136	49	184	AGCCCTGAAAACGAAAAGCAG	59.662	21	100	90.48	TCCACGGAGACAACTTTGGA	58.875	20	100	100	137	48	184	AGCCCTGAAAACGAAAAGCA	58.601	20	100	90	TCCACGGAGACAACTTTGGA	58.875	20	100	100	137	48	184
CPSSR_389|TAA	GCCCTGAAAACGAAAAGCAGA	59.663	21	100	95.24	TCCACGGAGACAACTTTGGA	58.875	20	100	100	136	49	184	AGCCCTGAAAACGAAAAGCAG	59.662	21	100	90.48	TCCACGGAGACAACTTTGGA	58.875	20	100	100	137	48	184	AGCCCTGAAAACGAAAAGCA	58.601	20	100	90	TCCACGGAGACAACTTTGGA	58.875	20	100	100	137	48	184
CPSSR_390|TAC	CGCTCTTCCATCGCCTAGAT	59.399	20	100	100	AGGTGGTGGTGTTGGTTGTT	59.96	20	100	100	158	160	317	CGCTCTTCCATCGCCTAGAT	59.399	20	100	100	GGTGGTGGTGTTGGTTGTTG	59.825	20	100	100	157	160	316	CGCTCTTCCATCGCCTAGAT	59.399	20	100	100	GAGGTGGTGGTGTTGGTTGT	60.395	20	100	100	159	160	318
CPSSR_391|TAC	GGGGTCACCATTCCTGCAAT	60.325	20	100	100	ACCAGGGAGTCGTAATTCTGA	58.184	21	100	100	165	119	283	GGGGTCACCATTCCTGCAAT	60.325	20	100	100	TGTTAGTTTACCAGGGAGTCGT	58.766	22	100	100	174	119	292	GGGGTCACCATTCCTGCAAT	60.325	20	100	100	ACCAGGGAGTCGTAATTCTG	56.649	20	100	100	165	119	283
CPSSR_392|TAC	TCCAGTTGGTATCGGTAGGGT	59.993	21	100	100	TCAAGCCGCTGAGAAACCTT	59.891	20	100	70	179	107	285	TCCAGTTGGTATCGGTAGGGT	59.993	21	100	100	TTCAAGCCGCTGAGAAACCT	59.891	20	94.7	95	180	107	286	GTTGGTATCGGTAGGGTTGCT	59.791	21	100	100	TCAAGCCGCTGAGAAACCTT	59.891	20	100	70	175	111	285
CPSSR_393|TAC	GACAATGGAATCGCGGCTTC	59.972	20	100	100	GGAGCAGTCCTCGAAACCAT	59.749	20	100	100	200	108	307	GACAATGGAATCGCGGCTTC	59.972	20	100	100	TGGACGAAGCCGAAGAAGAA	59.323	20	100	100	151	108	258	CCGTCCGAGAGAGACAATGG	59.899	20	100	100	TGGACGAAGCCGAAGAAGAA	59.323	20	100	100	163	96	258
CPSSR_394|TAC	TGAGGCTTCTGAGGTAGGGA	59.289	20	95	100	TAGCGTCACCATTGCTCTCC	59.824	20	100	100	193	71	263	TGAGGCTTCTGAGGTAGGGA	59.289	20	95	100	CGTCACCATTGCTCTCCACA	60.321	20	100	95	190	71	260	TGAGGCTTCTGAGGTAGGGA	59.289	20	95	100	GCTCTAGCGTCACCATTGCT	60.461	20	100	100	197	71	267
CPSSR_395|TAGC	CACGTTCACTTGCCCTGTTG	59.971	20	100	100	GAATCCCAACAGGCAGACTCA	59.996	21	94.1	80.95	175	25	199	CACGTTCACTTGCCCTGTTG	59.971	20	100	100	TGAATCCCAACAGGCAGACTC	59.996	21	94.4	85.71	176	25	200	CACGTTCACTTGCCCTGTTG	59.971	20	100	100	AATCCCAACAGGCAGACTCA	58.933	20	N/A	N/A	174	25	198
CPSSR_396|TAT	CTTGCTCTTCGGAGATGCCA	60.108	20	100	100	AGGGTGCTAGGGACTCGAAT	60.032	20	100	100	134	156	289	TCTTGCTCTTCGGAGATGCC	59.823	20	100	100	AGGGTGCTAGGGACTCGAAT	60.032	20	100	100	135	155	289	CGACGATCTCTGCCTCGAAT	59.691	20	100	100	AGGGTGCTAGGGACTCGAAT	60.032	20	100	100	155	135	289
CPSSR_397|TATC	TGATGCAGCATCCAAGGGAA	59.668	20	100	100	ACGTCATGGCCCAGATAGTG	59.534	20	100	100	163	100	262	TTGATGCAGCATCCAAGGGA	59.668	20	100	100	ACGTCATGGCCCAGATAGTG	59.534	20	100	100	164	99	262	GCAGCATCCAAGGGAAATCG	59.617	20	100	100	ACGTCATGGCCCAGATAGTG	59.534	20	100	100	159	104	262
CPSSR_398|TATC	TGATGCAGCATCCAAGGGAA	59.668	20	100	100	ACGTCATGGCCCAGATAGTG	59.534	20	100	100	163	100	262	TTGATGCAGCATCCAAGGGA	59.668	20	100	100	ACGTCATGGCCCAGATAGTG	59.534	20	100	100	164	99	262	GCAGCATCCAAGGGAAATCG	59.617	20	100	100	ACGTCATGGCCCAGATAGTG	59.534	20	100	100	159	104	262
CPSSR_399|TC	ACCCTTGCTGCCATTCAACT	60.179	20	100	100	TTGGGTTGGCAGAGTAGTGC	60.251	20	95	100	197	110	306	ACCCTTGCTGCCATTCAACT	60.179	20	100	100	GCCTAGAGCAACCCATCACA	59.747	20	100	100	176	110	285	TCTGATGCCCAACACCAACA	59.815	20	100	100	GCCTAGAGCAACCCATCACA	59.747	20	100	100	199	87	285
CPSSR_400|TC	TCGCTTTCGTGTCTCCAACA	59.897	20	N/A	N/A	GGGATGGCCAGTATCTGCTC	59.964	20	100	100	197	180	376	TCGCTTTCGTGTCTCCAACA	59.897	20	N/A	N/A	TTAGACGCCATGCCAGATCC	59.893	20	100	100	146	180	325	AAACCCTCGCTTTCGTGTCT	59.894	20	95	100	TTAGACGCCATGCCAGATCC	59.893	20	100	100	152	174	325
CPSSR_401|TC	CCGGCGTGTGACTCTAGATC	59.97	20	100	100	TGTCCCGATATTTGACTCTTCTGT	59.534	24	100	100	169	175	343	GATCCGGCGTGTGACTCTAG	59.97	20	100	100	TGTCCCGATATTTGACTCTTCTGT	59.534	24	100	100	172	172	343	CCGGCGTGTGACTCTAGATC	59.97	20	100	100	CGACTACATGAATCTTGTCCCGAT	60.5	24	100	100	184	175	358
CPSSR_402|TC	CCGGCGTGTGACTCTAGATC	59.97	20	100	100	TGTCCCGATATTTGACTCTTCTGT	59.534	24	100	100	169	175	343	GATCCGGCGTGTGACTCTAG	59.97	20	100	100	TGTCCCGATATTTGACTCTTCTGT	59.534	24	100	100	172	172	343	CCGGCGTGTGACTCTAGATC	59.97	20	100	100	CGACTACATGAATCTTGTCCCGAT	60.5	24	100	100	184	175	358
CPSSR_403|TC	CTCCACTTTCCCACCAACCA	59.815	20	100	100	TGATCAATCTTGGTCATGCCA	57.631	21	100	100	157	162	318	TCTCCACTTTCCCACCAACC	59.523	20	100	100	TGATCAATCTTGGTCATGCCA	57.631	21	100	100	158	161	318	CTCCACTTTCCCACCAACCA	59.815	20	100	100	TGGTCATGCCAGTTATTACAGTCA	60.02	24	100	100	147	162	308
CPSSR_404|TC	GTGGAACTTCTCTTGGTTGGC	59.391	21	100	80.95	ACGCCATTCACCTTGAGGAG	60.036	20	100	100	179	168	346	GTGGAACTTCTCTTGGTTGGC	59.391	21	100	80.95	CGCCATTCACCTTGAGGAGA	59.75	20	100	100	178	168	345	GTGGAACTTCTCTTGGTTGGC	59.391	21	100	80.95	AACGCCATTCACCTTGAGGA	59.6	20	100	100	180	168	347
CPSSR_405|TC	GAGAAAAGGAAGGGGCGGAA	59.962	20	100	100	TCCGTGGAAATTTTGCAGTTCT	59.044	22	100	100	199	73	271	GAGAAAAGGAAGGGGCGGAA	59.962	20	100	100	TGCAGTTCTTACAGATGACGTCA	59.995	23	100	100	186	73	258	TCATGCGGGCTGTTGAGAAA	60.251	20	100	100	TGCAGTTCTTACAGATGACGTCA	59.995	23	100	100	200	59	258
CPSSR_406|TC	TGGGGTGTAAGGCTCTCAGA	59.884	20	N/A	N/A	TGTAGCGAGCACTGCAAAGA	59.967	20	100	65	160	139	298	AGTGGGGTGTAAGGCTCTCA	60.179	20	N/A	N/A	TGTAGCGAGCACTGCAAAGA	59.967	20	100	65	162	137	298	TCGCAACTTGGCACTCTTCA	60.179	20	N/A	N/A	TGTAGCGAGCACTGCAAAGA	59.967	20	100	65	198	101	298
CPSSR_407|TC	TTGTACTCTCGCCTCCTCCA	59.961	20	N/A	N/A	ACTGCTGCGACAGAAGAGAG	59.757	20	100	100	198	119	316	TTGTACTCTCGCCTCCTCCA	59.961	20	N/A	N/A	CTGCTGCGACAGAAGAGAGA	59.475	20	100	100	197	119	315	CCTCCTCCACGACCTTCTCA	60.612	20	100	100	CAGGTTACTGCTGCGACAGA	60.038	20	100	100	193	130	322
CPSSR_408|TC	TTGTACTCTCGCCTCCTCCA	59.961	20	N/A	N/A	ACTGCTGCGACAGAAGAGAG	59.757	20	100	100	198	119	316	TTGTACTCTCGCCTCCTCCA	59.961	20	N/A	N/A	CTGCTGCGACAGAAGAGAGA	59.475	20	100	100	197	119	315	CCTCCTCCACGACCTTCTCA	60.612	20	100	100	CAGGTTACTGCTGCGACAGA	60.038	20	100	100	193	130	322
CPSSR_409|TC	TCCCACCACCGAAGTTCATG	59.964	20	N/A	N/A	GGAAGGTGGTCATCCTGAGC	60.107	20	100	55	128	150	277	CCCACCACCGAAGTTCATGT	60.251	20	N/A	N/A	GGAAGGTGGTCATCCTGAGC	60.107	20	100	55	127	151	277	CCTATGGATGATGCGAGGCA	59.677	20	95	100	GGAAGGTGGTCATCCTGAGC	60.107	20	100	55	106	172	277
CPSSR_410|TC	ACAGGTTGGAACTAGCTCTT	56.074	20	N/A	N/A	TCCAGCAACGAACATGTCCT	59.604	20	100	100	168	127	294	AACAGGTTGGAACTAGCTCT	56.074	20	N/A	N/A	TCCAGCAACGAACATGTCCT	59.604	20	100	100	169	126	294	ACAGGTTGGAACTAGCTCTTTTG	58.862	23	N/A	N/A	TCCAGCAACGAACATGTCCT	59.604	20	100	100	168	127	294
CPSSR_411|TC	CAGTCATGGTGGGAAGCCAT	60.034	20	100	100	GAGCAGGAATCCCAGAGAGC	59.893	20	95	100	176	60	235	GCTCGCTCTCTCCTCGAATC	60.04	20	100	100	ACCATTGGCACAGAGGATCG	60.108	20	100	95	100	168	267	AATCTCCTCTCTCGCCGACT	60.107	20	100	100	CCATTGGCACAGAGGATCGT	60.108	20	100	100	130	137	266
CPSSR_412|TC	CAGTCATGGTGGGAAGCCAT	60.034	20	100	100	GAGCAGGAATCCCAGAGAGC	59.893	20	95	100	176	60	235	GCTCGCTCTCTCCTCGAATC	60.04	20	100	100	ACCATTGGCACAGAGGATCG	60.108	20	100	95	100	168	267	AATCTCCTCTCTCGCCGACT	60.107	20	100	100	CCATTGGCACAGAGGATCGT	60.108	20	100	100	130	137	266
CPSSR_413|TC	ACTGATCTGAGCCTCGTCTCT	60.065	21	95.2	100	GAGAGTAAGCATCGGCAGCT	59.896	20	95	100	137	141	277	CTGACTGATCTGAGCCTCGTC	59.935	21	100	85.71	GAGAGTAAGCATCGGCAGCT	59.896	20	95	100	140	138	277	TGACTGATCTGAGCCTCGTC	58.901	20	100	85	GAGAGTAAGCATCGGCAGCT	59.896	20	95	100	139	139	277
CPSSR_414|TC	ACCAACATGATGACACTCCCA	59.295	21	100	76.19	CCAGAAGAGAGTCGCAGCTC	60.179	20	100	100	196	108	303	ACCAACATGATGACACTCCCA	59.295	21	100	76.19	CCAACCAGAAGAGAGTCGCA	59.682	20	100	100	200	108	307	ACCAACATGATGACACTCCCA	59.295	21	100	76.19	GAGAGTCGCAGCTCACCAAA	60.32	20	100	100	190	108	297
CPSSR_415|TC	GCCGATCTAGCTTCCTCGAC	60.04	20	100	100	GCAGAAATCAGCTCGCGAAG	59.974	20	100	100	140	155	294	TTCCCAACTCCCTCCTCGAT	59.957	20	100	100	GCAGAAATCAGCTCGCGAAG	59.974	20	100	100	114	181	294	TTCCCAACTCCCTCCTCGAT	59.957	20	100	100	GAGCGATGAGTACCGAGCAA	59.899	20	100	100	184	181	364
CPSSR_416|TC	AGAGTTTGGCCACAGTCACC	60.179	20	100	100	AAACTCGATCGTCCGTCTCG	59.903	20	100	100	130	128	257	CCACAGTCACCACAAGAGCA	60.179	20	100	100	AAACTCGATCGTCCGTCTCG	59.903	20	100	100	121	137	257	AGAGTTTGGCCACAGTCACC	60.179	20	100	100	GATCGTCCGTCTCGTCAACA	59.833	20	100	100	124	128	251
CPSSR_417|TC	TTGTCAGCTCAGGTTGCAGA	59.531	20	95	100	TGGAACAGCCAAGCTACACT	59.235	20	95	100	196	120	315	TGTCAGCTCAGGTTGCAGAT	59.311	20	95	100	TGGAACAGCCAAGCTACACT	59.235	20	95	100	195	121	315	TTGTCAGCTCAGGTTGCAGA	59.531	20	95	100	TGGAACAGCCAAGCTACACTT	59.857	21	95.2	100	196	120	315
CPSSR_418|TC	CACCCACACCTAGCATGCAT	60.395	20	100	100	GGTTTTGAGGTTGCAGATGGG	59.727	21	100	100	194	41	234	CACCCACACCTAGCATGCAT	60.395	20	100	100	AGGAGGTTTTGAGGTTGCAGA	59.505	21	100	100	198	41	238	CACCACCCACACCTAGCATG	60.678	20	100	100	GGTTTTGAGGTTGCAGATGGG	59.727	21	100	100	197	38	234
CPSSR_419|TC	GCTTGAATTGTGCCCTCAGC	60.109	20	95	100	GCCACGTGCACACAAGGATA	60.953	20	95	100	160	122	281	GCTTGAATTGTGCCCTCAGC	60.109	20	95	100	CCACGTGCACACAAGGATAT	58.262	20	95	100	159	122	280	GCTTGAATTGTGCCCTCAGC	60.109	20	95	100	TGGAACCAGCTCAATCATCCT	59.082	21	95	95.24	187	122	308
CPSSR_420|TC	GCTTGAATTGTGCCCTCAGC	60.109	20	95	100	GCCACGTGCACACAAGGATA	60.953	20	95	100	160	122	281	GCTTGAATTGTGCCCTCAGC	60.109	20	95	100	CCACGTGCACACAAGGATAT	58.262	20	95	100	159	122	280	GCTTGAATTGTGCCCTCAGC	60.109	20	95	100	TGGAACCAGCTCAATCATCCT	59.082	21	95	95.24	187	122	308
CPSSR_421|TC	GCAAACTGCAAATCTACTGTTC	56.524	22	100	100	CCAAAGTTTGTTCTCGCACGA	59.671	21	100	100	177	101	277	GCAAACTGCAAATCTACTGTTC	56.524	22	100	100	TGTTCTCGCACGAGTTACTCA	59.395	21	100	100	169	101	269	GCAAACTGCAAATCTACTGT	54.505	20	100	100	TGTTCTCGCACGAGTTACTCA	59.395	21	100	100	169	101	269
CPSSR_422|TC	TCTGGCTAATGACGCACAGG	60.108	20	100	100	TCATGCCACCTTGGATGCTT	59.96	20	100	100	102	149	250	TCTGGCTAATGACGCACAGG	60.108	20	100	100	CATGCCACCTTGGATGCTTG	59.825	20	100	100	101	149	249	TCTGGCTAATGACGCACAGG	60.108	20	100	100	ACCCTTCCCTCCCTCAACAT	60.179	20	95	100	196	149	344
CPSSR_423|TC	TCTGGCTAATGACGCACAGG	60.108	20	100	100	TCATGCCACCTTGGATGCTT	59.96	20	100	100	102	149	250	TCTGGCTAATGACGCACAGG	60.108	20	100	100	CATGCCACCTTGGATGCTTG	59.825	20	100	100	101	149	249	TCTGGCTAATGACGCACAGG	60.108	20	100	100	ACCCTTCCCTCCCTCAACAT	60.179	20	95	100	196	149	344
CPSSR_424|TC	TCTGGCTAATGACGCACAGG	60.108	20	100	100	TCATGCCACCTTGGATGCTT	59.96	20	100	100	102	149	250	TCTGGCTAATGACGCACAGG	60.108	20	100	100	CATGCCACCTTGGATGCTTG	59.825	20	100	100	101	149	249	TCTGGCTAATGACGCACAGG	60.108	20	100	100	ACCCTTCCCTCCCTCAACAT	60.179	20	95	100	196	149	344
CPSSR_425|TC	TCTGGCTAATGACGCACAGG	60.108	20	100	100	TCATGCCACCTTGGATGCTT	59.96	20	100	100	102	149	250	TCTGGCTAATGACGCACAGG	60.108	20	100	100	CATGCCACCTTGGATGCTTG	59.825	20	100	100	101	149	249	TCTGGCTAATGACGCACAGG	60.108	20	100	100	ACCCTTCCCTCCCTCAACAT	60.179	20	95	100	196	149	344
CPSSR_426|TC	CGTTTGCCTGCGTGAAGAAA	59.971	20	100	100	GTTCTCGGGAGATTCAGACCT	58.896	21	100	100	155	114	268	CGTTTGCCTGCGTGAAGAAA	59.971	20	100	100	AGTTCTCGGGAGATTCAGACC	58.896	21	100	100	156	114	269	CGTTTGCCTGCGTGAAGAAA	59.971	20	100	100	TCTCGGGAGATTCAGACCTACA	59.759	22	100	100	153	114	266
CPSSR_427|TC	CACCCTTTACCCATGCAGGA	59.669	20	95	100	ACACAAAGGCTTCATTCTGA	55.171	20	100	100	119	172	290	CACCCTTTACCCATGCAGGA	59.669	20	95	100	CACCTACATGATAAACTGAGCACA	58.822	24	100	100	166	172	337	CACCCTTTACCCATGCAGGA	59.669	20	95	100	TCACCTACATGATAAACTGAGCAC	58.58	24	100	100	167	172	338
CPSSR_428|TC	GGCGGCTGCATCTCTACTAG	60.039	20	100	90	AGCCAAAACCCACTTCCCAA	60.032	20	100	100	121	131	251	GGCGGCTGCATCTCTACTAG	60.039	20	100	90	CCCAATTCACCGTACCGACA	60.037	20	N/A	N/A	175	131	305	GGCGGCTGCATCTCTACTAG	60.039	20	100	90	CCCAGATGGCAGAACAGGTT	59.961	20	N/A	N/A	144	131	274
CPSSR_429|TC	CGAGAAAACCAGCTCCACCT	59.965	20	N/A	N/A	GCCATCATCAGTACCGCCAT	60.25	20	100	100	195	69	263	ACCAGCTCCACCTTTTGCTT	60.106	20	90	100	GCCATCATCAGTACCGCCAT	60.25	20	100	100	188	76	263	AACCAGCTCCACCTTTTGCT	60.106	20	N/A	N/A	GCCATCATCAGTACCGCCAT	60.25	20	100	100	189	75	263
CPSSR_430|TC	CGAGAAAACCAGCTCCACCT	59.965	20	N/A	N/A	CCATCGTCAGTACCGCCATT	60.179	20	95	100	194	69	262	ACCAGCTCCACCTTTTGCTT	60.106	20	90	100	CCATCGTCAGTACCGCCATT	60.179	20	95	100	187	76	262	AACCAGCTCCACCTTTTGCT	60.106	20	N/A	N/A	CCATCGTCAGTACCGCCATT	60.179	20	95	100	188	75	262
CPSSR_431|TC	CGAGAAAACCAGCTCCACCT	59.965	20	N/A	N/A	GCCATCATCAGTACCGCCAT	60.25	20	100	100	195	69	263	ACCAGCTCCACCTTTTGCTT	60.106	20	90	100	GCCATCATCAGTACCGCCAT	60.25	20	100	100	188	76	263	AACCAGCTCCACCTTTTGCT	60.106	20	N/A	N/A	GCCATCATCAGTACCGCCAT	60.25	20	100	100	189	75	263
CPSSR_432|TC	CGAGAAAACCAGCTCCACCT	59.965	20	N/A	N/A	CCCCTCTCAACCCCACAAAA	59.813	20	100	100	158	69	226	ACCAGCTCCACCTTTTGCTT	60.106	20	90	100	CCCCTCTCAACCCCACAAAA	59.813	20	100	100	151	76	226	AACCAGCTCCACCTTTTGCT	60.106	20	N/A	N/A	CCCCTCTCAACCCCACAAAA	59.813	20	100	100	152	75	226
CPSSR_433|TC	CGAGAAAACCAGCTCCACCT	59.965	20	N/A	N/A	CCATCGTCAGTACCGCCATT	60.179	20	95	100	194	69	262	ACCAGCTCCACCTTTTGCTT	60.106	20	90	100	CCATCGTCAGTACCGCCATT	60.179	20	95	100	187	76	262	AACCAGCTCCACCTTTTGCT	60.106	20	N/A	N/A	CCATCGTCAGTACCGCCATT	60.179	20	95	100	188	75	262
CPSSR_434|TC	CGAGAAAACCAGCTCCACCT	59.965	20	N/A	N/A	CCCCTCTCAACCCCACAAAA	59.813	20	100	100	158	69	226	ACCAGCTCCACCTTTTGCTT	60.106	20	90	100	CCCCTCTCAACCCCACAAAA	59.813	20	100	100	151	76	226	AACCAGCTCCACCTTTTGCT	60.106	20	N/A	N/A	CCCCTCTCAACCCCACAAAA	59.813	20	100	100	152	75	226
CPSSR_435|TC	CGAGAAAACCAGCTCCACCT	59.965	20	N/A	N/A	CCCCTCTCAACCCCACAAAA	59.813	20	100	100	158	69	226	ACCAGCTCCACCTTTTGCTT	60.106	20	90	100	CCCCTCTCAACCCCACAAAA	59.813	20	100	100	151	76	226	AACCAGCTCCACCTTTTGCT	60.106	20	N/A	N/A	CCCCTCTCAACCCCACAAAA	59.813	20	100	100	152	75	226
CPSSR_436|TC	CACTCTCTCTGCACTGCTGA	59.398	20	100	100	GCAAGAGGCAGAAGAGAGGA	59.099	20	100	100	181	145	325	TCACTCTCTCTGCACTGCTG	59.398	20	100	100	GCAAGAGGCAGAAGAGAGGA	59.099	20	100	100	182	144	325	CACTCTCTCTGCACTGCTGA	59.398	20	100	100	TGTGGAGTTTGTGGATGAGCA	59.857	21	100	100	199	145	343
CPSSR_437|TC	CACTCTCTCTGCACTGCTGA	59.398	20	100	100	GCAAGAGGCAGAAGAGAGGA	59.099	20	100	100	180	145	324	TCACTCTCTCTGCACTGCTG	59.398	20	100	100	GCAAGAGGCAGAAGAGAGGA	59.099	20	100	100	181	144	324	CACTCTCTCTGCACTGCTGA	59.398	20	100	100	TGTGGAGTTTGTGGATGAGCA	59.857	21	100	100	198	145	342
CPSSR_438|TC	GCACCCGCGTCTTTAAATCC	59.902	20	100	100	CAGTCTTGCAAAATGGGCATGA	60.029	22	100	100	126	132	257	GCACCCGCGTCTTTAAATCC	59.902	20	100	100	TCAGTCTTGCAAAATGGGCATG	60.029	22	100	100	127	132	258	GCACCCGCGTCTTTAAATCC	59.902	20	100	100	TGAGTCTTCTTTCCCTCCCTCT	59.887	22	100	100	197	132	328
CPSSR_439|TC	GCACCCGCGTCTTTAAATCC	59.902	20	100	100	CAGTCTTGCAAAATGGGCATGA	60.029	22	100	100	126	132	257	GCACCCGCGTCTTTAAATCC	59.902	20	100	100	TCAGTCTTGCAAAATGGGCATG	60.029	22	100	100	127	132	258	GCACCCGCGTCTTTAAATCC	59.902	20	100	100	TGAGTCTTCTTTCCCTCCCTCT	59.887	22	100	100	197	132	328
CPSSR_440|TC	TCTCCCTTCTCGCTCTCTCC	60.107	20	100	100	TATCCTTGGGAGCAGCGAGT	60.688	20	100	100	141	46	186	CTTCTCGCTCTCTCCACACC	59.828	20	100	100	TATCCTTGGGAGCAGCGAGT	60.688	20	100	100	136	51	186	CCTTCTCGCTCTCTCCACAC	59.828	20	100	100	TATCCTTGGGAGCAGCGAGT	60.688	20	100	100	137	50	186
CPSSR_441|TC	AGCCAATCTCTGCAAAGACCA	59.926	21	100	100	GACTTCATGTCCCTTGTTGTTCT	58.862	23	100	100	190	91	280	AGCCAATCTCTGCAAAGACCA	59.926	21	100	100	ACTTCATGTCCCTTGTTGTTCT	57.83	22	100	100	189	91	279	AGCCAATCTCTGCAAAGACCA	59.926	21	100	100	GACTTCATGTCCCTTGTTGT	55.574	20	100	100	190	91	280
CPSSR_442|TC	GTGCTGACAGTACATGTGGGA	59.998	21	100	100	TCTCACAACCCCAACAACGA	59.458	20	100	100	189	44	232	GTGCTGACAGTACATGTGGGA	59.998	21	100	100	GTCTCACAACCCCAACAACG	59.339	20	100	100	190	44	233	TGCTGACAGTACATGTGGGA	58.653	20	100	100	TCTCACAACCCCAACAACGA	59.458	20	100	100	188	45	232
CPSSR_443|TC	GACCAACGCACCAAGGTTTC	59.97	20	95	100	AACGAAAGCGCGTCTACAGA	60.04	20	N/A	N/A	125	114	238	GACCAACGCACCAAGGTTTC	59.97	20	95	100	ACGAAAGCGCGTCTACAGAT	59.829	20	N/A	N/A	124	114	237	TGCAAGCAAAGCAACACCAA	59.751	20	100	100	AACGAAAGCGCGTCTACAGA	60.04	20	N/A	N/A	148	91	238
CPSSR_444|TC	GGTTGGCCTCCTTCCAGATT	59.667	20	100	100	TCAGGAGAAAATCTGGGACGA	58.464	21	100	100	190	94	283	GGTTGGCCTCCTTCCAGATT	59.667	20	100	100	AGGAGAAAATCTGGGACGAACA	59.362	22	100	100	188	94	281	CATGGTTGGCCTCCTTCCAG	60.682	20	100	100	TCAGGAGAAAATCTGGGACGA	58.464	21	100	100	193	91	283
CPSSR_445|TC	GGTTGGCCTCCTTCCAGATT	59.667	20	100	100	TCAGGAGAAAATCTGGGACGA	58.464	21	100	100	190	94	283	GGTTGGCCTCCTTCCAGATT	59.667	20	100	100	AGGAGAAAATCTGGGACGAACA	59.362	22	100	100	188	94	281	CATGGTTGGCCTCCTTCCAG	60.682	20	100	100	TCAGGAGAAAATCTGGGACGA	58.464	21	100	100	193	91	283
CPSSR_446|TC	GCGAGAGGCAGGATACAAGT	59.538	20	100	90	TGACTTTGTCTCCGCCTTGA	59.244	20	100	80	131	122	252	CGCGAGAGGCAGGATACAAG	60.596	20	100	85	TGACTTTGTCTCCGCCTTGA	59.244	20	100	80	132	121	252	GCGAGAGGCAGGATACAAGT	59.538	20	100	90	CCGCCTTGAAATTCCACACA	59.042	20	95	100	120	122	241
CPSSR_447|TC	GCGAGAGGCAGGATACAAGT	59.538	20	100	90	TGACTTTGTCTCCGCCTTGA	59.244	20	100	80	131	122	252	CGCGAGAGGCAGGATACAAG	60.596	20	100	85	TGACTTTGTCTCCGCCTTGA	59.244	20	100	80	132	121	252	GCGAGAGGCAGGATACAAGT	59.538	20	100	90	CCGCCTTGAAATTCCACACA	59.042	20	95	100	120	122	241
CPSSR_448|TC	GAAGCAGAGGAGAGGCCATG	60.179	20	95	100	GCACTCTCCACTGTCACCAA	59.893	20	100	100	146	139	284	GCCGAGGCTGAGAAGAAGAA	59.752	20	95	100	GCACTCTCCACTGTCACCAA	59.893	20	100	100	184	101	284	TCTTCAGCAGCGGATGTTGA	59.679	20	95	100	GCACTCTCCACTGTCACCAA	59.893	20	100	100	105	180	284
CPSSR_449|TC	GAAGCAGAGGAGAGGCCATG	60.179	20	95	100	GCACTCTCCACTGTCACCAA	59.893	20	100	100	146	139	284	GCCGAGGCTGAGAAGAAGAA	59.752	20	95	100	GCACTCTCCACTGTCACCAA	59.893	20	100	100	184	101	284	TCTTCAGCAGCGGATGTTGA	59.679	20	95	100	GCACTCTCCACTGTCACCAA	59.893	20	100	100	105	180	284
CPSSR_450|TCA	TCCTCCTCTAACTGCCCCTT	59.582	20	100	85	GTCGCCATTGCACCTTCATC	59.901	20	100	100	188	158	345	TCCTCCTCTAACTGCCCCTT	59.582	20	100	85	TGCACCTTCATCACAGGCTT	59.889	20	100	100	180	158	337	TCCTCCTCTAACTGCCCCTT	59.582	20	100	85	TTGCACCTTCATCACAGGCT	59.889	20	100	100	181	158	338
CPSSR_451|TCC	ACATCTCAGCCAAGCACCTC	60.036	20	100	100	CACAGAGGCTGAGAGCAACA	59.966	20	100	100	123	173	295	GCCAAGCACCTCCTCTTCTT	59.963	20	100	90	CACAGAGGCTGAGAGCAACA	59.966	20	100	100	115	181	295	ACATCTCAGCCAAGCACCTC	60.036	20	100	100	GGAGGGCATGGATGAGATGG	59.962	20	95	100	147	173	319
CPSSR_452|TCC	GCTTTTGTTTGGCCCACGAT	59.967	20	100	100	CAGTGAGGCGTCGGTGTAAT	60.109	20	100	100	192	110	301	GCTTTTGTTTGGCCCACGAT	59.967	20	100	100	GTGGTTCTCCCGGCTCATAC	60.179	20	100	100	165	110	274	GCTTTTGTTTGGCCCACGAT	59.967	20	100	100	CTCCCGGCTCATACTCATCG	59.758	20	100	100	159	110	268
CPSSR_453|TCG	GGGCTGCTCCTCTTCTTCAT	59.454	20	100	100	TACAGTGGCCAATGGTGACG	60.321	20	100	100	127	136	262	GGGCTGCTCCTCTTCTTCAT	59.454	20	100	100	GATGATGGTGGTGACGAGGA	59.176	20	100	100	198	136	333	GGCTGCTCCTCTTCTTCATCA	59.791	21	100	95.24	TACAGTGGCCAATGGTGACG	60.321	20	100	100	126	137	262
CPSSR_454|TCG	AAGTCTTCGGCAGCTCCAAG	60.321	20	100	100	CTCCCTCTCCTCCTCGATGA	59.524	20	100	100	137	104	240	CGCTTCCCAGAAGAAGACCA	59.678	20	95	100	CTCCCTCTCCTCCTCGATGA	59.524	20	100	100	195	46	240	TCAGACGCTGACGACTACAG	59.203	20	95	100	TTGTCTTTCGCTCCATGCCT	59.963	20	100	100	191	137	327
CPSSR_455|TCG	GACCTCACTGTCCTTCCTTGT	59.305	21	100	100	GGGGATCGCAGTAGATAGGC	59.467	20	100	95	174	167	340	GACCTCACTGTCCTTCCTTGT	59.305	21	100	100	AGGCTGGTTGGTTTCCAAGA	59.444	20	100	100	158	167	324	ACCTCACTGTCCTTCCTTGT	58.192	20	100	100	GGGGATCGCAGTAGATAGGC	59.467	20	100	95	173	168	340
CPSSR_456|TCG	GACGAGGGATTTCGGGTTCA	59.752	20	100	100	CCATCCCGATTTCGCTCGAT	60.32	20	100	100	166	70	235	TGACGAGGGATTTCGGGTTC	59.752	20	100	100	CCATCCCGATTTCGCTCGAT	60.32	20	100	100	167	69	235	ACGAGGGATTTCGGGTTCAG	59.751	20	100	100	CCATCCCGATTTCGCTCGAT	60.32	20	100	100	165	71	235
CPSSR_457|TCG	GACGAGGGATTTCGGGTTCA	59.752	20	100	100	CCATCCCGATTTCGCTCGAT	60.32	20	100	100	166	70	235	TGACGAGGGATTTCGGGTTC	59.752	20	100	100	CCATCCCGATTTCGCTCGAT	60.32	20	100	100	167	69	235	ACGAGGGATTTCGGGTTCAG	59.751	20	100	100	CCATCCCGATTTCGCTCGAT	60.32	20	100	100	165	71	235
CPSSR_458|TCG	TCGAGCTTTCATTGCCACCT	59.963	20	100	100	CGTGGAGGACGTGAAGGAAG	60.389	20	100	100	113	141	253	TTCGGCTCCGTCCTCCTTAT	60.397	20	95	100	CTCTCTCTCGCTCGCCATTT	59.898	20	100	100	196	172	367	CGAGCTTTCATTGCCACCTG	59.83	20	100	100	CGTGGAGGACGTGAAGGAAG	60.389	20	100	100	112	142	253
CPSSR_459|TCG	ACAGGGATTTCACGGCTGAG	60.036	20	100	95	GCCTCCCTTGAACCCTTCTC	60.035	20	100	100	110	141	250	ACAGGGATTTCACGGCTGAG	60.036	20	100	95	CGTCCAATTCAAGCCTCCCT	60.035	20	100	100	122	141	262	GACAGGGATTTCACGGCTGA	60.036	20	100	100	GCCTCCCTTGAACCCTTCTC	60.035	20	100	100	111	140	250
CPSSR_460|TCG	ACAGGGATTTCACGGCTGAG	60.036	20	100	95	GCCTCCCTTGAACCCTTCTC	60.035	20	100	100	110	141	250	ACAGGGATTTCACGGCTGAG	60.036	20	100	95	CGTCCAATTCAAGCCTCCCT	60.035	20	100	100	122	141	262	GACAGGGATTTCACGGCTGA	60.036	20	100	100	GCCTCCCTTGAACCCTTCTC	60.035	20	100	100	111	140	250
CPSSR_461|TCT	TGAAGGTCCATTGCTCTGCA	59.599	20	100	100	CCGCAATTGCTTCCTTTGCA	60.32	20	N/A	N/A	172	180	351	TGAAGGTCCATTGCTCTGCA	59.599	20	100	100	TGGGTGATACTGCAAAGCGA	59.677	20	100	55	146	180	325	TGAAGGTCCATTGCTCTGCA	59.599	20	100	100	CCCCGCAATTGCTTCCTTTG	60.39	20	N/A	N/A	174	180	353
CPSSR_462|TCT	TGCCTCCACTCATAGCATCA	58.501	20	100	100	ACCATCACTTGCTTGGGTGA	59.522	20	100	80	173	149	321	TTGCCTCCACTCATAGCATCA	59.161	21	100	100	ACCATCACTTGCTTGGGTGA	59.522	20	100	80	174	148	321	TCTTTGCCTCCACTCATAGCA	59.091	21	100	100	ACCATCACTTGCTTGGGTGA	59.522	20	100	80	177	145	321
CPSSR_463|TCT	TGCCTCCACTCATAGCATCA	58.501	20	100	100	ACCATCACTTGCTTGGGTGA	59.522	20	100	80	173	149	321	TTGCCTCCACTCATAGCATCA	59.161	21	100	100	ACCATCACTTGCTTGGGTGA	59.522	20	100	80	174	148	321	TCTTTGCCTCCACTCATAGCA	59.091	21	100	100	ACCATCACTTGCTTGGGTGA	59.522	20	100	80	177	145	321
CPSSR_464|TCT	CCGTCCTGCTCATCATCCTG	60.25	20	100	100	ATGCGTCTCTCAGCTGCTTT	60.037	20	95	100	181	86	266	CCGTCCTGCTCATCATCCTG	60.25	20	100	100	AATGCGTCTCTCAGCTGCTT	60.037	20	95	100	182	86	267	CCGTCCTGCTCATCATCCTG	60.25	20	100	100	ACCACCAATGCGTCTCTCAG	60.037	20	95	100	188	86	273
CPSSR_465|TCT	CATCGCTCTTGTCGCTTTCG	59.976	20	100	100	AAGGGGCCCTGTGTGATCTA	60.253	20	100	100	105	142	246	CGAACGACGGGAGAGTTCTT	59.76	20	100	100	AAGGGGCCCTGTGTGATCTA	60.253	20	100	100	197	50	246	GCATCGCTCTTGTCGCTTTC	60.247	20	100	100	AAGGGGCCCTGTGTGATCTA	60.253	20	100	100	106	141	246
CPSSR_466|TCT	CAGAGGCTCTCCAATGGCAA	60.035	20	100	100	GCTCGCTTCCTTCTCCTCTC	59.898	20	100	100	135	161	295	ACCTCATGTGGCGATCATCC	59.893	20	100	100	GCTCGCTTCCTTCTCCTCTC	59.898	20	100	100	173	123	295	CAGAGGCTCTCCAATGGCAA	60.035	20	100	100	TGCACCTTCCTCACCTCTCT	60.179	20	95	100	191	161	351
CPSSR_467|TCT	ACGAGGAGGGTGAGAGGAAA	59.885	20	100	100	AACCACCAGAGCAACAACGA	60.107	20	100	100	177	118	294	ACGAGGAGGGTGAGAGGAAA	59.885	20	100	100	ACCACCAGAGCAACAACGAT	59.891	20	100	100	176	118	293	ACGAGGAGGGTGAGAGGAAA	59.885	20	100	100	CACCAGAGCAACAACGATGC	60.11	20	100	100	174	118	291
CPSSR_468|TCT	GGCGGAGATAGACGTGGAAA	59.541	20	100	80	CGCTGGTAGATCCATTTCGC	59.138	20	100	100	127	102	228	GGTGAGATTAACGGCGGAGA	59.541	20	95	100	CGCTGGTAGATCCATTTCGC	59.138	20	100	100	139	90	228	GGCGGAGATAGACGTGGAAA	59.541	20	100	80	CGATGTTCAATCACGCTGGT	58.921	20	100	100	140	102	241
CPSSR_469|TCT	CCGTCGAGCCCTACACTTTT	60.038	20	100	100	CTGCCATCTACAGCTGCAGT	60.108	20	100	100	142	23	164	CCGTCGAGCCCTACACTTTT	60.038	20	100	100	TGCCATCTACAGCTGCAGTC	60.108	20	100	100	141	23	163	CCGTCGAGCCCTACACTTTT	60.038	20	100	100	GCCATCTACAGCTGCAGTCT	59.822	20	100	100	140	23	162
CPSSR_470|TCT	CCGTCGAGCCCTACACTTTT	60.038	20	100	100	CTGCCATCTACAGCTGCAGT	60.108	20	100	100	142	23	164	CCGTCGAGCCCTACACTTTT	60.038	20	100	100	TGCCATCTACAGCTGCAGTC	60.108	20	100	100	141	23	163	CCGTCGAGCCCTACACTTTT	60.038	20	100	100	GCCATCTACAGCTGCAGTCT	59.822	20	100	100	140	23	162
CPSSR_471|TCT	CCGTCGAGCCCTACACTTTT	60.038	20	100	100	CTGCCATCTACAGCTGCAGT	60.108	20	100	100	142	23	164	CCGTCGAGCCCTACACTTTT	60.038	20	100	100	TGCCATCTACAGCTGCAGTC	60.108	20	100	100	141	23	163	CCGTCGAGCCCTACACTTTT	60.038	20	100	100	GCCATCTACAGCTGCAGTCT	59.822	20	100	100	140	23	162
CPSSR_472|TCT	CTGCTCAGCACTGCTCTTCT	60.037	20	100	100	TTTGCGATGGGTGGTGATGA	59.963	20	100	100	108	165	272	CTGCTCAGCACTGCTCTTCT	60.037	20	100	100	TGATTTGCGATGGGTGGTGA	59.963	20	100	100	111	165	275	CTCTGCTCAGCACTGCTCTT	60.037	20	100	100	TTTGCGATGGGTGGTGATGA	59.963	20	100	100	110	163	272
CPSSR_473|TCT	GCCCACGAGTGTTTGTTGAC	59.971	20	100	100	TCGAGAGGAGCAAGAGTGGT	60.251	20	100	85	198	58	255	CCATCACTGCTGCCTCTTGA	60.036	20	100	100	TCGAGAGGAGCAAGAGTGGT	60.251	20	100	85	122	134	255	CAACACCTCCACCCTCTTCC	59.963	20	100	100	TCGAGAGGAGCAAGAGTGGT	60.251	20	100	85	179	77	255
CPSSR_474|TCT	CAATCCTCAACCCTGGCCAA	60.252	20	N/A	N/A	CCGGAGCTTTGTAGACGGTA	59.187	20	100	100	194	75	268	CCCTCCTCGCCCAACAAATA	59.745	20	N/A	N/A	CCGGAGCTTTGTAGACGGTA	59.187	20	100	100	117	152	268	CTTAACCCTCCTCGCCCAAC	60.393	20	N/A	N/A	CCGGAGCTTTGTAGACGGTA	59.187	20	100	100	122	147	268
CPSSR_475|TCT	CCTCCCCTTTCCATCACTCG	59.821	20	100	100	GATGCCCTAGACGAGAAGCC	59.967	20	100	100	141	169	309	CCTCCCCTTTCCATCACTCG	59.821	20	100	100	GCCCTAGACGAGAAGCCAAA	59.751	20	100	100	138	169	306	TCCATCACTCGTCTCCTCCT	59.374	20	100	100	GATGCCCTAGACGAGAAGCC	59.967	20	100	100	132	178	309
CPSSR_476|TCT	CATCGCTCTTGTCGCTTTCG	59.976	20	100	100	GGAAGGGACCCTGTGTGATC	59.747	20	100	100	110	142	251	CATCGCTCTTGTCGCTTTCG	59.976	20	100	100	CATGGAAGGGACCCTGTGTG	60.323	20	100	100	113	142	254	CATCGCTCTTGTCGCTTTCG	59.976	20	100	100	TGGAAGGGACCCTGTGTGAT	60.476	20	100	100	111	142	252
CPSSR_477|TCT	TCCGATTCACATCCCCAACG	60.108	20	100	100	TGGGGAATTCACACGGGAAG	59.962	20	100	100	176	9	184	TTCACATCCCCAACGGTCTC	59.676	20	100	100	TGGGGAATTCACACGGGAAG	59.962	20	100	100	171	14	184	CACATCCCCAACGGTCTCTG	60.392	20	100	100	TGGGGAATTCACACGGGAAG	59.962	20	100	100	169	16	184
CPSSR_478|TCT	CGCCCGTCCCTATTTCCATT	60.179	20	100	100	ACGGTGTTTGTGGCTGAGAA	60.107	20	100	100	176	167	342	GAGACGCCCGTCCCTATTTC	60.249	20	100	100	ACGGTGTTTGTGGCTGAGAA	60.107	20	100	100	180	163	342	CGCCCGTCCCTATTTCCATT	60.179	20	100	100	GGTGTTTGTGGCTGAGAACG	59.692	20	100	100	174	167	340
CPSSR_479|TCT	GGGTGTTGGGGTTAAAGCGT	60.825	20	100	100	CCTACTCCAACACTCCATCACA	59.433	22	100	86.36	186	154	339	TGGTGACCGAAAGCGATGAA	59.966	20	100	100	TTCCACCACAAATCCCTTCT	56.63	20	100	100	199	96	294	GGGTGTTGGGGTTAAAGCGT	60.825	20	100	100	ACTCCTACTCCAACACTCCA	57.303	20	100	70	189	154	342
CPSSR_480|TCT	TGGAATATCTTGCCGCCACA	59.746	20	100	100	CGCTGGCTCCGAAACAGATA	60.179	20	100	100	193	111	303	TGCCGCCACACCCTAATTTA	59.671	20	100	100	CGCTGGCTCCGAAACAGATA	60.179	20	100	100	183	121	303	ACGCTGCGTACCATGTTTTC	59.484	20	95	100	CGCTGGCTCCGAAACAGATA	60.179	20	100	100	163	141	303
CPSSR_481|TG	CGTTGCCTTCCCTCGGTAAT	60.108	20	100	100	CCATAACCGCTCTGCCAAAC	59.548	20	100	100	157	153	309	GCCCAAGAACCTTGGCATTC	59.753	20	100	100	CCATAACCGCTCTGCCAAAC	59.548	20	100	100	176	134	309	CGTTGCCTTCCCTCGGTAAT	60.108	20	100	100	CCCATAACCGCTCTGCCAAA	60.68	20	100	100	158	153	310
CPSSR_482|TG	GGCCTCCGTATTCCCCAAAA	60.034	20	N/A	N/A	AGGGAGAAGGGCAAACAAACA	60.063	21	100	100	148	64	211	GGCCTCCGTATTCCCCAAAA	60.034	20	N/A	N/A	GGGAGAAGGGCAAACAAACAC	59.931	21	100	100	147	64	210	CTTCCTGGCCTCCGTATTCC	59.893	20	95	100	AGGGAGAAGGGCAAACAAACA	60.063	21	100	100	154	58	211
CPSSR_483|TG	AGGGTGAAGGAGATGAAGCC	59.085	20	100	100	GTGCTGTCCCCTCCTCTCTA	60.033	20	100	100	153	174	326	AGGGTGAAGGAGATGAAGCC	59.085	20	100	100	CTCCTCGTGACTCTGTGCTG	60.109	20	100	100	167	174	340	AGGGTGAAGGAGATGAAGCC	59.085	20	100	100	TCTCCTCGTGACTCTGTGCT	60.251	20	100	100	168	174	341
CPSSR_484|TG	ACCATAAGAAGGAATTGACAGG	55.776	22	100	100	TGTTGGCAACCATCATCATTCA	58.837	22	100	100	176	46	221	ACCATAAGAAGGAATTGACAGG	55.776	22	100	100	TCCTAACTTTTGTTGGCAACCA	58.634	22	95.5	100	186	46	231	CCATAAGAAGGAATTGACAGGA	55.508	22	100	100	TGTTGGCAACCATCATCATTCA	58.837	22	100	100	175	47	221
CPSSR_485|TG	ACAGTTCCCTTGGCACTGAT	59.226	20	100	100	TTTTGGGGCACTTGAGCTCT	59.814	20	100	100	118	152	269	ACAGTTCCCTTGGCACTGAT	59.226	20	100	100	TTTGGGGCACTTGAGCTCTC	60.251	20	100	100	117	152	268	GCCTTTACAGTTCCCTTGGC	59.111	20	100	100	TTTTGGGGCACTTGAGCTCT	59.814	20	100	100	124	146	269
CPSSR_486|TG	GGCCACCGGTTCTCTAACAA	59.964	20	95	100	GGCTAAGATGTTGGGTGCCT	60.034	20	100	100	176	104	279	TTGGCCACCGGTTCTCTAAC	59.964	20	N/A	N/A	GGCTAAGATGTTGGGTGCCT	60.034	20	100	100	178	102	279	TTACTTGGCCACCGGTTCTC	59.964	20	95	100	GGCTAAGATGTTGGGTGCCT	60.034	20	100	100	182	98	279
CPSSR_487|TG	CATCATTTGTTGGGCGCAGA	59.473	20	100	100	TGATGTCACCTGAGCTTTCTCA	59.366	22	100	100	200	82	281	TCATTTGTTGGGCGCAGAAG	59.402	20	100	100	TGATGTCACCTGAGCTTTCTCA	59.366	22	100	100	198	84	281	AGAAGCCACTCATTCTGCGA	59.39	20	100	100	TGATGTCACCTGAGCTTTCTCA	59.366	22	100	100	183	99	281
CPSSR_488|TGA	CCACAAGCATGGGAGGATGA	59.743	20	N/A	N/A	TACCGCACCCGAAATGTTCA	59.965	20	100	100	158	96	253	CCACAAGCATGGGAGGATGA	59.743	20	N/A	N/A	CCGCACCCGAAATGTTCATC	59.901	20	100	100	156	96	251	CCACCCTGGCACCCATTATT	60.032	20	100	100	ATGTTCATCACAGCCCGTCA	59.675	20	100	100	195	46	240
CPSSR_489|TGA	TCGCATAACAGACTGGCACT	59.392	20	100	85	GTGCAAGAGCTCACAGGGAA	60.25	20	100	100	176	131	306	TCGCATAACAGACTGGCACT	59.392	20	100	85	GGAAAGACTCCACCTTGGCT	59.598	20	100	100	160	131	290	TCGCATAACAGACTGGCACT	59.392	20	100	85	TGCAAGAGCTCACAGGGAAA	59.526	20	100	100	175	131	305
CPSSR_490|TGA	GTGGGATGAAAACGGAACCC	59.114	20	100	100	CACCTCAACAGCAACCCTGA	60.179	20	100	100	166	103	268	GTGGGATGAAAACGGAACCC	59.114	20	100	100	TTCACCTCAACAGCAACCCT	59.449	20	100	100	168	103	270	GTGGGATGAAAACGGAACCC	59.114	20	100	100	ACCTCAACAGCAACCCTGAT	59.226	20	100	100	165	103	267
CPSSR_491|TGA	GGTGATGGCGGAGATTGAGA	59.534	20	100	100	GGGTTTCATCCAGCTCGCTA	59.822	20	N/A	N/A	196	129	324	GGTGATGGCGGAGATTGAGA	59.534	20	100	100	TCATCCAGCTCGCTAATGGC	60.25	20	95	100	191	129	319	CGGTGATGGCGGAGATTGAG	60.878	20	100	100	GGGTTTCATCCAGCTCGCTA	59.822	20	N/A	N/A	197	128	324
CPSSR_492|TGC	GCGAGTATCAGCTGGTGGTA	59.255	20	100	100	ACGTGCAGAGGAATCCTGTG	60.037	20	100	90	188	67	254	AGCGAGTATCAGCTGGTGGT	60.973	20	100	100	ACGTGCAGAGGAATCCTGTG	60.037	20	100	90	189	66	254	GCGAGTATCAGCTGGTGGTA	59.255	20	100	100	GCAACAGTACGTGCAGAGGA	60.32	20	95	100	196	67	262
CPSSR_493|TGC	CCTTGCTGAGACACCATGGT	59.963	20	95	100	CAGCCCAAGTCAACCATTGC	60.038	20	100	100	174	71	244	CCTTGCTGAGACACCATGGT	59.963	20	95	100	TCATCCAGCCCAAGTCAACC	59.962	20	100	100	179	71	249	CCTTGCTGAGACACCATGGT	59.963	20	95	100	GGAGTCATCCAGCCCAAGTC	60.107	20	100	100	183	71	253
CPSSR_494|TGG	TGACTGCCCAAGTTCCTTCT	58.86	20	100	100	TTGGTCAAGTGCACACCCAT	60.106	20	N/A	N/A	178	175	352	TGACTGCCCAAGTTCCTTCT	58.86	20	100	100	ATTGGTCAAGTGCACACCCA	60.106	20	N/A	N/A	179	175	353	TGACTGCCCAAGTTCCTTCT	58.86	20	100	100	TTCACCATTCCAGGCAACGA	59.89	20	100	85	142	175	316
CPSSR_495|TGG	TGGAGGGTGTGGGTTGTCTA	60.105	20	100	100	CCTCCAACACCAGCTCCTTC	60.322	20	100	85	193	61	253	CTTTGGAGGGTGTGGGTTGT	60.106	20	100	100	CCTCCAACACCAGCTCCTTC	60.322	20	100	85	196	58	253	TTTGGAGGGTGTGGGTTGTC	60.106	20	100	100	CCTCCAACACCAGCTCCTTC	60.322	20	100	85	195	59	253
CPSSR_496|TGG	TCCATTCAGCTTCACGGCTT	59.963	20	100	100	TCTGTCACGCAAACCCTGTT	60.107	20	100	65	199	166	364	TCAGCTTCACGGCTTCTTCC	60.321	20	100	100	TCTGTCACGCAAACCCTGTT	60.107	20	100	65	194	171	364	TCCATTCAGCTTCACGGCTT	59.963	20	100	100	CCGTTCGTCCATTGCGTTTC	60.452	20	100	100	147	166	312
CPSSR_497|TGG	GACCGTGTTCCATGTCGACT	60.039	20	100	100	CAACAGCCTCCGATCTCTCC	59.896	20	100	100	183	65	247	GACCGTGTTCCATGTCGACT	60.039	20	100	100	CCTCAACAGCCTCCGATCTC	59.896	20	100	100	186	65	250	GACCGTGTTCCATGTCGACT	60.039	20	100	100	CCTCCGATCTCTCCCTCCAA	60.106	20	100	100	177	65	241
CPSSR_498|TGG	TCGGCATCCTCGTCCTCATA	60.179	20	100	100	CGACGATCATCTCCGGGAAC	60.318	20	100	100	189	71	259	GCTCACTTCCTACGTCTGCA	59.756	20	100	100	CGACGATCATCTCCGGGAAC	60.318	20	100	100	158	102	259	TGCTCACTTCCTACGTCTGC	59.756	20	100	100	CGACGATCATCTCCGGGAAC	60.318	20	100	100	159	101	259
CPSSR_499|TGT	GGGAGAGACACGAATGCGAT	59.897	20	100	100	ACGTTCAAACCCTCTGCACA	60.107	20	100	100	110	148	257	CCGGAGAAGAATTGGAGCGT	60.108	20	100	100	ACGTTCAAACCCTCTGCACA	60.107	20	100	100	141	117	257	AAGGGAGAGACACGAATGCG	60.109	20	100	100	ACGTTCAAACCCTCTGCACA	60.107	20	100	100	112	146	257
CPSSR_500|TGT	GGGAGAGACACGAATGCGAT	59.897	20	100	100	ACGTTCAAACCCTCTGCACA	60.107	20	100	100	110	148	257	CCGGAGAAGAATTGGAGCGT	60.108	20	100	100	ACGTTCAAACCCTCTGCACA	60.107	20	100	100	141	117	257	AAGGGAGAGACACGAATGCG	60.109	20	100	100	ACGTTCAAACCCTCTGCACA	60.107	20	100	100	112	146	257
CPSSR_501|TGT	CGCAATCACATACATTGGAGCA	59.645	22	100	100	GCACCGTCGTGTTAGGGTAA	60.038	20	100	100	162	122	283	CGCAATCACATACATTGGAGCA	59.645	22	100	100	CCAAACCGAACACCATACGC	59.833	20	100	85	141	122	262	ACATTGGAGCAGAACTTCGT	57.449	20	100	100	GCACCGTCGTGTTAGGGTAA	60.038	20	100	100	151	133	283
CPSSR_502|TTA	TTGCTCTTTCGCAGAAACCG	59.414	20	100	100	GCAAAGCATCACAGCCCAAA	59.966	20	100	80	128	58	185	TCGGTGCTGTCTCTTCTTCC	59.396	20	100	100	TCAGCTTGTCTTCCCCGTTC	59.965	20	100	100	163	99	261	TCGGTGCTGTCTCTTCTTCC	59.396	20	100	100	CAGCTTGTCTTCCCCGTTCT	59.965	20	100	100	162	99	260
CPSSR_503|TTAT	AAGGACTGGTGGTGATGTGC	60.251	20	100	100	ACACACACGTAGCCAACCAA	60.108	20	100	60	114	153	266	AAGGACTGGTGGTGATGTGC	60.251	20	100	100	CACACGTAGCCAACCAAACC	59.69	20	100	75	111	153	263	ATGTGCCAGACCACCCTGTA	60.84	20	100	100	ACACACACGTAGCCAACCAA	60.108	20	100	60	100	167	266
CPSSR_504|TTAT	ACCTCTGATGCCTGGAAAGG	59.377	20	95	100	GGCATTTCTACTTATGAGCATC	55.045	22	100	100	179	119	297	AACCTCTGATGCCTGGAAAGG	59.995	21	95.2	100	GGCATTTCTACTTATGAGCATC	55.045	22	100	100	180	118	297	CGCTACAAAACCTCTGATGCC	59.602	21	95.2	100	GGCATTTCTACTTATGAGCATC	55.045	22	100	100	188	110	297
CPSSR_505|TTAT	GGCGTTGCAATCAAGTACGG	60.179	20	100	100	ACACACACGTAGCCAACCAA	60.108	20	100	60	178	89	266	CCGGCGTTGCAATCAAGTAC	60.179	20	100	100	ACACACACGTAGCCAACCAA	60.108	20	100	60	180	87	266	AAGGACTGGTGGTGATGTGC	60.251	20	100	100	ACACACACGTAGCCAACCAA	60.108	20	100	60	114	153	266
CPSSR_506|TTC	GAACAGCCCCAAGAGGAGAC	60.036	20	100	100	TCTGATCCTCTTCGGGACCA	59.665	20	100	100	166	126	291	CCAAGAGGAGACAGCGAGTT	59.394	20	100	100	TCTGATCCTCTTCGGGACCA	59.665	20	100	100	158	134	291	GAACAGCCCCAAGAGGAGAC	60.036	20	100	100	GAAAGACAGCGTGAACTGCA	59.063	20	100	100	199	126	324
CPSSR_507|TTC	CCGACGACTGCAGATTCAGA	59.829	20	100	95	TTCGCAGAGGACCCAGAAAC	59.965	20	100	100	197	105	301	CCGACGACTGCAGATTCAGA	59.829	20	100	95	GTTCGCAGAGGACCCAGAAA	59.965	20	100	100	198	105	302	CCGACGACTGCAGATTCAGA	59.829	20	100	95	CGCAGAGGACCCAGAAACTT	59.965	20	100	100	195	105	299
CPSSR_508|TTC	AGGAGGTCTTTCTCTGGAGCT	59.921	21	100	100	CACACTGCTGCTCCTCTTCA	59.966	20	100	100	153	147	299	AGGAGGTCTTTCTCTGGAGCT	59.921	21	100	100	TCACACTGCTGCTCCTCTTC	59.68	20	100	100	154	147	300	AGGAGGTCTTTCTCTGGAGCT	59.921	21	100	100	ACACTGCTGCTCCTCTTCAG	59.679	20	100	100	152	147	298
CPSSR_509|TTC	AGGAGGTCTTTCTCTGGAGCT	59.921	21	100	100	CACACTGCTGCTCCTCTTCA	59.966	20	100	100	153	147	299	AGGAGGTCTTTCTCTGGAGCT	59.921	21	100	100	TCACACTGCTGCTCCTCTTC	59.68	20	100	100	154	147	300	AGGAGGTCTTTCTCTGGAGCT	59.921	21	100	100	ACACTGCTGCTCCTCTTCAG	59.679	20	100	100	152	147	298
CPSSR_510|TTC	ACACGCATCGTTTCTCCACT	59.966	20	100	85	CCGATCATTAACGGCGTCGA	60.593	20	100	100	174	141	314	CACACGCATCGTTTCTCCAC	59.836	20	100	90	CCGATCATTAACGGCGTCGA	60.593	20	100	100	175	140	314	ACACGCATCGTTTCTCCACT	59.966	20	100	85	GAGCTTCTTCTCGGGCTTGG	60.743	20	100	100	132	141	272
CPSSR_511|TTC	ACACGCATCGTTTCTCCACT	59.966	20	100	85	CCGATCATTAACGGCGTCGA	60.593	20	100	100	174	141	314	CACACGCATCGTTTCTCCAC	59.836	20	100	90	CCGATCATTAACGGCGTCGA	60.593	20	100	100	175	140	314	ACACGCATCGTTTCTCCACT	59.966	20	100	85	GAGCTTCTTCTCGGGCTTGG	60.743	20	100	100	132	141	272
CPSSR_512|TTC	GCTTTGCTTTCTGCCTTGCT	59.967	20	100	100	AATGGCGCTTTCACTCTGGA	59.963	20	95	100	152	97	248	GCTTTGCTTTCTGCCTTGCT	59.967	20	100	100	GCGCTTTCACTCTGGAGGAT	60.108	20	95	100	148	97	244	GCTTTGCTTTCTGCCTTGCT	59.967	20	100	100	ATGGCGCTTTCACTCTGGAG	60.392	20	95	100	151	97	247
CPSSR_513|TTC	GTTGCCCAGAGCCAGAAGAT	60.035	20	100	100	CTCTACTTCGGCAGCGAGAG	59.971	20	100	100	133	128	260	TTGCCCAGAGCCAGAAGATC	59.746	20	100	100	CTCTACTTCGGCAGCGAGAG	59.971	20	100	100	132	129	260	GCCCAGAGCCAGAAGATCAT	59.527	20	100	100	CTCTACTTCGGCAGCGAGAG	59.971	20	100	100	130	131	260
CPSSR_514|TTC	CACCGCCACAGGGTTATTCT	60.035	20	100	100	AGCAGCGCCCTAAAAGTGAT	60.035	20	100	90	182	148	329	ATCATCATCCACCGCCACAG	60.179	20	100	100	AGCAGCGCCCTAAAAGTGAT	60.035	20	100	90	191	139	329	GAATACAAGCTGCCGCCAAG	59.901	20	100	100	AGGGATTGGTGGTTGAGCAA	59.518	20	100	100	145	98	242
CPSSR_515|TTC	TTTCGATTTCGGCCTCGGAT	59.823	20	100	100	CGATTGCGCAGACGAAGAAG	59.976	20	100	100	133	36	168	ATTTCGATTTCGGCCTCGGA	59.823	20	100	100	CGATTGCGCAGACGAAGAAG	59.976	20	100	100	134	35	168	CGGCCTCGGATCCAATTTCT	60.179	20	100	100	CGATTGCGCAGACGAAGAAG	59.976	20	100	100	124	45	168
CPSSR_516|TTC	TCTCTGGGCTTGCTTCTTCA	58.941	20	100	100	AGAGCTCAGAGAGGAGGAAGA	59.078	21	100	100	110	178	287	TCTCTGGGCTTGCTTCTTCA	58.941	20	100	100	GCGAAGTTAGAGCTCAGAGAGG	60.223	22	100	100	118	178	295	TCTCTGGGCTTGCTTCTTCA	58.941	20	100	100	AGCTCAGAGAGGAGGAAGATGA	59.755	22	100	100	108	178	285
CPSSR_517|TTC	CGAGCAAACCGTCAACAAGG	60.041	20	95	100	GACAGTGGCAGGAAAGTTGC	59.688	20	100	100	178	8	185	GAGACGAAAGGGCAGAGTCC	60.109	20	100	100	GACAGTGGCAGGAAAGTTGC	59.688	20	100	100	130	56	185	GGAGACGAAAGGGCAGAGTC	60.109	20	100	100	GACAGTGGCAGGAAAGTTGC	59.688	20	100	100	131	55	185
CPSSR_518|TTC	TGGGACACCGTTTCCTGATG	59.964	20	100	85	TGGAACCAACAGGGAGGAAG	59.229	20	95	100	163	99	261	CTTGGGACACCGTTTCCTGA	59.892	20	100	95	TGGAACCAACAGGGAGGAAG	59.229	20	95	100	165	97	261	ACTTGGGACACCGTTTCCTG	60.179	20	100	100	TGGAACCAACAGGGAGGAAG	59.229	20	95	100	166	96	261
CPSSR_519|TTCT	ACCAGGCCATCAATGACCAG	60.034	20	100	100	TCCAAACCACCAGAACTGCA	59.743	20	100	100	119	129	247	ACCTCACCTAGCCAGTTTGC	59.963	20	100	100	TCCAAACCACCAGAACTGCA	59.743	20	100	100	141	107	247	ACCAGAGGCTCCCCATAGTT	59.955	20	95	100	TCCAAACCACCAGAACTGCA	59.743	20	100	100	104	144	247
CPSSR_520|TTG	TCTGCTGGGGTTTGGTTCTG	60.179	20	95	100	CACTCCTCCTCACACCACAC	59.966	20	100	100	111	160	270	TCTGCTGGGGTTTGGTTCTG	60.179	20	95	100	CAGGAGATGACCCTCTTCGC	59.896	20	100	100	194	160	353	TCTGCTGGGGTTTGGTTCTG	60.179	20	95	100	GCAGGAGATGACCCTCTTCG	59.896	20	100	100	195	160	354
CPSSR_521|TTGA	TCCAATCTTAGCGCCTCTGC	60.179	20	100	100	CCATCACAGAATCGGCTCGA	59.897	20	100	90	185	34	218	TAGCGCCTCTGCTACTTTCC	59.54	20	95	100	CCATCACAGAATCGGCTCGA	59.897	20	100	90	177	42	218	GGTCCAATCTTAGCGCCTCT	59.534	20	100	100	CCATCACAGAATCGGCTCGA	59.897	20	100	90	187	32	218
